# Supplementary material for: Cp*Rh(iii)-catalyzed regioselective cyclization of aromatic amides with allenes
Source: Royal Society of Chemistry journal article supplement (doi:10.1039/d3cc05342c), 2023-12-07

– Supporting Information –

**Cp\*Rh(III)-Catalyzed Regioselective Cyclization of Aromatic Amides with  
Allenenes**

Jing Liu,<sup>a</sup> Deng-Yin Liu,<sup>a</sup> Qian Yang,<sup>a</sup> Yao-Fu Zeng,<sup>\*b</sup> Xiao-Li Wang,<sup>a</sup> Peng-Fei Wang,<sup>a</sup> Yu-Jun Ruan,<sup>a</sup> Miao-Miao Wen,<sup>a</sup> Shang-Shi Zhang,<sup>\*c</sup> Li-da Du,<sup>\*d</sup> Xu-Ge Liu,<sup>\*a</sup>

<sup>a</sup>*Zhongzhou Laborator, School of Pharmacy, Henan University, Kaifeng, Henan 475004, China.*

<sup>b</sup>*School of Pharmaceutical Science, Hengyang Medical School, University of South China, Hengyang 421000, P. R. China.*

<sup>c</sup>*Center for Drug Research and Development, Guangdong Pharmaceutical University, Guangzhou, 510006, P. R. China, E-mail:*

<sup>d</sup>*Institute of Molecular Medicine & Innovative Pharmaceuticals, Qingdao University, Qingdao 266071, China,*

*E-mail: liuxg7@henu.edu.cn.*

|                                                                       |    |
|-----------------------------------------------------------------------|----|
| <b>1. General Information</b> .....                                   | 2  |
| <b>2. Synthesis of Starting Materials</b> .....                       | 2  |
| <b>3. General Procedure for the synthesis of products</b> .....       | 10 |
| <b>4. Application and Preliminary mechanistic investigation</b> ..... | 13 |
| <b>5. X-Ray crystal data for compound 3oa and 5ja.</b> .....          | 17 |
| <b>6. Characterization Data</b> .....                                 | 31 |
| <b>7. References</b> .....                                            | 59 |
| <b>8. Characterization of NMR spectra</b> .....                       | 60 |

## 1. General Information

Unless otherwise noted, all reactions were carried out under an atmosphere of argon in flame-dried glassware. If reaction was not carried out at room temperature, reaction temperatures are reported as the temperature of the bath surrounding the vessel unless otherwise stated. The dry solvents used were purified by distillation over the drying agents indicated in parentheses and were transferred under argon: THF (Na-benzophenone), CH<sub>2</sub>Cl<sub>2</sub> (CaH<sub>2</sub>). Anhydrous triethylamine, DMF, dioxane, EtOH and MeOH were purchased from Acros Organics and stored over molecular sieves under argon.

Proton NMR (<sup>1</sup>H) were recorded at 300/400/500 MHz, and Carbon NMR (<sup>13</sup>C) at 101/126 MHz NMR spectrometer unless otherwise stated. The following abbreviations are used for the multiplicities: s: singlet, d: doublet, t: triplet, q: quartet, m: multiplet, br s: broad singlet for proton spectra. Coupling constants (*J*) are reported in Hertz (Hz).

Analytical thin layer chromatography was performed on Polygram SILG/UV254 plates. Visualization was accomplished with short wave UV light, or KMnO<sub>4</sub> staining solutions followed by heating. Flash column chromatography was performed using silica gel (200-300 mesh or 600-800 mesh) with solvents distilled prior to use.

<sup>1</sup>H and <sup>13</sup>C NMR spectra were recorded on a Bruker AV 300 or AV 400, Varian 500 MHz INOVA or Varian Unity plus 600 in solvents as indicate. Chemical shifts (δ) are given in ppm relative to TMS. The residual solvent signals were used as references and the chemical shifts converted to the TMS scale (CDCl<sub>3</sub>: δH = 7.26 ppm, δC = 77.16 ppm; d<sub>6</sub>-DMSO: δH = 2.50 ppm, δC = 39.52 ppm; d<sub>4</sub>-CD<sub>3</sub>OD: δH = 3.31 ppm, δC = 49.00 ppm). ESI mass spectra were recorded on a Bruker Daltonics MicroTof. No attempts were made to optimize yields for substrate synthesis.

## 2. Synthesis of Starting Materials

### 2.1 Synthesis of *N*-(pivaloyloxy)benzamide

### General Procedure 1a

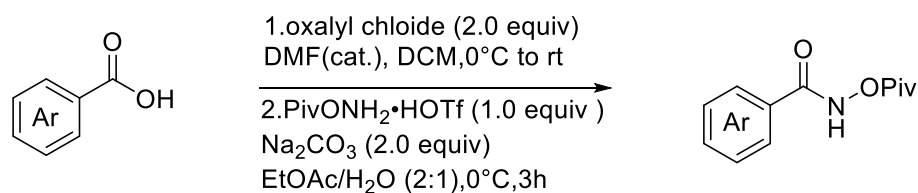

*N*-(pivaloyloxy)benzamide were prepared according to the literature reported procedures:

1) To a solution of the carboxylic acid (3.0 mmol, 1.0 equiv) in dry CH<sub>2</sub>Cl<sub>2</sub> (10 mL) at 0 °C was added dropwise oxalyl chloride (1.0 mL, 6 mmol, 2.0 equiv) followed by a catalytic amount of dry DMF (2 drops). The reaction was allowed to stir at room temperature until completion (typically 2h). The solvent was then removed under reduce pressure to afford the corresponding crude acid chloride.

2) *O*-pivaloylhydroxamine triflic acid (801 mg, 3.0 mmol, 1.2 equiv) was added to a biphasic mixture of Na<sub>2</sub>CO<sub>3</sub> (635 mg, 6.0 mmol, 2.0 equiv) in a 2:1 mixture of EtOAc (20 mL) and H<sub>2</sub>O (10 mL). The resulting solution was cooled to 0 °C followed by dropwise addition of the unpurified acid chloride dissolved in a minimum amount of EtOAc. The flask containing the acid chloride was then rinsed with additional EtOAc. The reaction was allowed to stir for 3h. Afterwards, the phases were separated and the aqueous phase was extracted twice with EtOAc. The combined organic layers were dried over MgSO<sub>4</sub>, filtered, and evaporated under reduced pressure. The pure products were obtained without any further purification or purified by column chromatography.

### General Procedure 1b

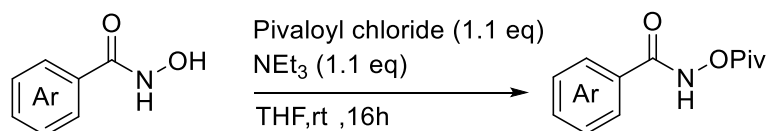

Benzhydroxamic acid (1.37 g, 10.0 mmol, 1.0 equiv), triethylamine (1.5 mL, 11 mmol, 1.1 equiv) and pivaloyl chloride (1.4 mL, 11 mmol, 1.1 equiv) in dry THF (30 mL) was stirred for overnight at rt. EtOAc (20 mL) was added and the reaction was washed with 1 M HCl (20 mL), water (2 x 20 mL) and then brine (20 mL). After drying the organic layer over Na<sub>2</sub>SO<sub>4</sub>, evaporation of the solvent gave a white solid. Recrystallization from pentane/EtOAc gave the pure product as a white solid (1.5 g, 6.8 mmol, 68%).

Others have previously reported the synthesis of *N*-(pivaloyloxy)benzamides shown below. Substrates of **1a-1r**<sup>[1-3]</sup> were synthesized according to the above general procedure, and all the spectroscopic data matched those reported.

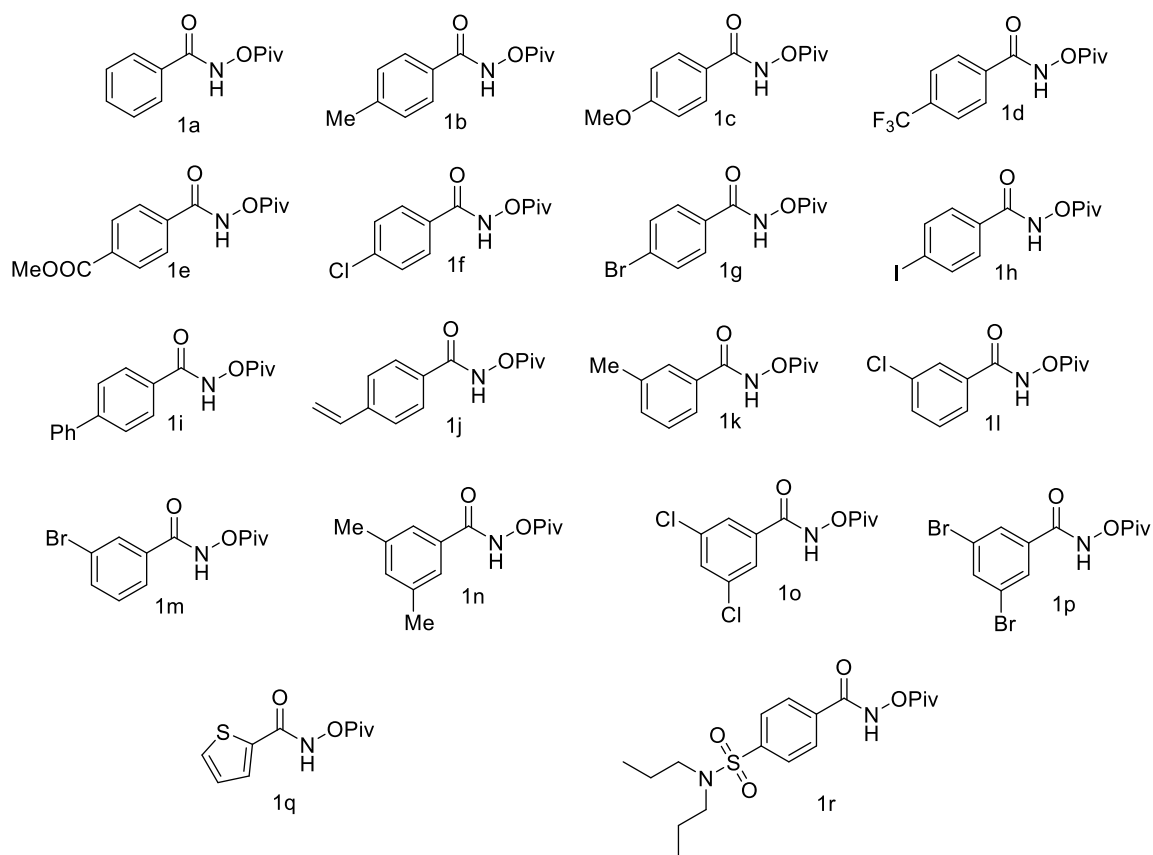

## 2.2 Synthesis of *O*-pivaloyl 1-indolehydroxamic acid

### General Procedure 2

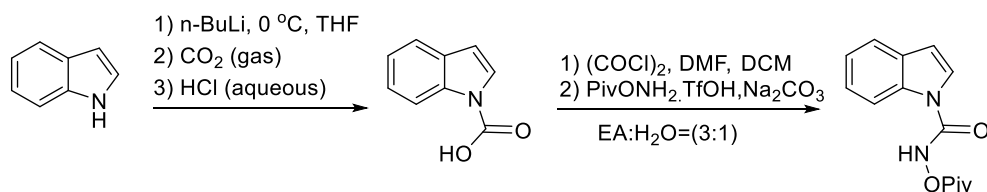

**The synthesis of 1H-indole-1-carboxylic acid:** To a cold (0 °C) solution of indole (2 g, 17 mmol) in THF (30 mL) was added dropwise a solution of n-BuLi (13 mL, 1.6 M in hexane) under a nitrogen atmosphere. After stirring at 0 °C for 2 h, the flask is freed of nitrogen by alternately evacuating and repressuring with CO<sub>2</sub> gas to 1 atmosphere. The mixture was stirred for 3 hours, then, quenched carefully with water (5.0 mL). The solution was then concentrated to 10 mL, followed by adding HCl solution (3 M aq.) to adjust the pH to 2. The organic phase was extracted by ethyl acetate and dried over anhydrous Mg<sub>2</sub>SO<sub>4</sub>. The pure product could be obtained by recrystallization by using hexane as a white solid (2.45 g, 89% yield), which could be used directly in next step without further purification.

**The synthesis of O-pivaloyl 1-indolehydroxamic acid:** In a nitrogen-filled flask, the mixture of 1H-indole-1-carboxylic acid (1.61 g, 10 mmol, 1.0 equiv), oxalyl chloride (2.2 mL, 25 mmol, 2.5 equiv) and few drops of DMF (ca. 0.1 equiv) in dichloromethane (15 mL) was stirred 3 h at room temperature. After evaporated under vacuum, the obtained residue was reacted with PivONH<sub>4</sub>•TfOH (2.67 g, 10 mmol, 1.0 equiv) and Na<sub>2</sub>CO<sub>3</sub> (2.14 g, 20 mmol, 2.0 equiv) for 3 h at 0 °C by using EtOAc/water (20 mL, 3:1) as a solvent. After reaction, the reaction mixture was extracted with EtOAc. The combined organic layers were dried over MgSO<sub>4</sub>. The solvent was removed in vacuo and 3a was obtained by silica gel column chromatography (PE/EtOAc) in 54% yield (white solid, 1.4 g)

Others have previously reported the synthesis of O-pivaloyl 1-indolehydroxamic acid shown below. 4a-4m<sup>[4-6]</sup> were synthesized according to the above general procedure, and all the spectroscopic data matched those reported.

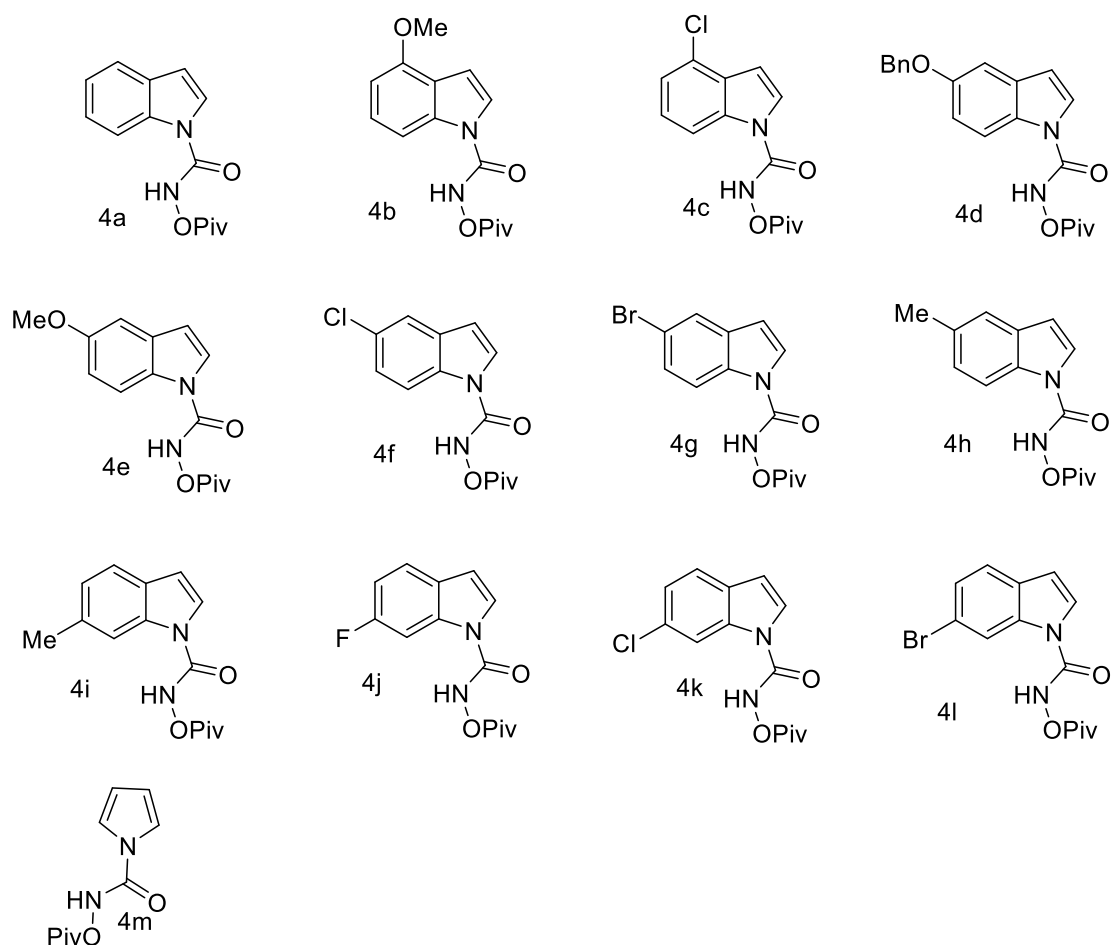

## 2.3 Synthesis of allenes 3

### General Procedure 3a for Synthesizing Allenoate

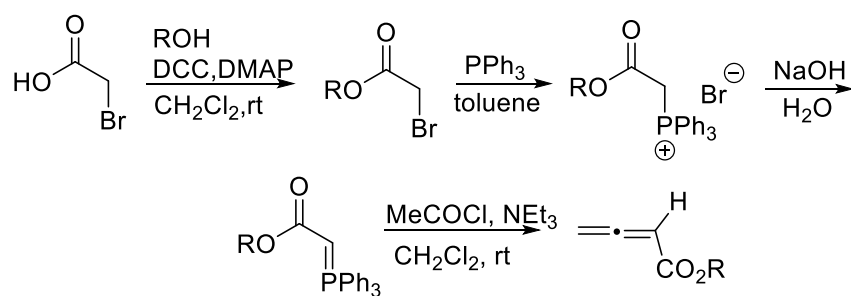

**Step 1:** To a solution of ROH (3 mmol, 1.0 equiv.) and 2-Bromoacetic acid (3.6 mmol, 1.2 equiv.) in  $\text{CH}_2\text{Cl}_2$  (30 mL) were added DCC (3.6 mmol, 1.2 equiv.) and DMAP (0.3 mmol, 0.1 equiv.) at room temperature. The reaction was stirred overnight. After the alcohol was consumed completely as determined by TLC analysis, the solvent was

evaporated. The residue was purified by column chromatography on silica gel ( 5% EtOAc/petroleum ether) to afford bromoacetic esters.

**Step 2:** To a solution of PPh<sub>3</sub> (1.5 mmol, 1.0 equiv.) in toluene 20 mL) was added bromoacetic esters (1.5 mmol, 1.0 equiv.) at room temperature. The reaction was stirred overnight. The formed precipitate was filtered, washed with toluene and dried t to afford the phosphonium salts.

**Step 3:** To a solution of the phosphonium salt (1.5 mmol) in a mixed solvent of CH<sub>2</sub>Cl<sub>2</sub>(20 mL) and H<sub>2</sub>O (10 mL) was added 1 drop solution of phenolphthalein in alcohol. sat. aq. NaOH was added dropwise until a permanent pink color was obtained. The mixture was extracted with CH<sub>2</sub>Cl<sub>2</sub>. The combined organic layers were dried over Na<sub>2</sub>SO<sub>4</sub>, filtered and evaporated under reduced pressure to give phosphorus ylide.

**Step 4:** To a solution of phosphorus ylide (1.0 mmol, 1.0 equiv.) in CH<sub>2</sub>Cl<sub>2</sub> (20 mL) was added Et<sub>3</sub>N (1.2 mmol, 1.2 equiv.). The reaction mixture was stirred for 0.5 h at room temperature before adding a solution of acetyl chloride (1.0 mmol, 1.0 equiv.) in CH<sub>2</sub>Cl<sub>2</sub> (20 mL) at room temperature. The reaction was stirred overnight at room temperature. After the phosphorus ylide was consumed completely as determined by TLC analysis, the solvent was evaporated under reduced pressure. The residue was treated with petroleum ether (30 mL) and EtOAc (15 mL) with stirring for 0.5 h. The mixture was filtered and the filtrate was evaporated under reduced pressure. The crude residue was purified by column chromatography on silica gel (5% EtOAc/ petroleum ether) to afford allenates .

### General Procedure 3b

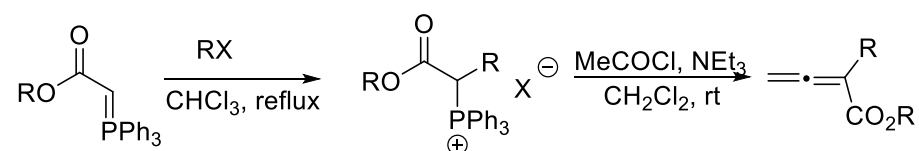

**Step 1:** To a solution of 2-(triphenylphosphanylidene)acetate in 25 mL  $\text{CHCl}_3$  was added the  $\text{RX}$  (1.1 equiv, 1.0 mmol) at room temperature. The reaction mixture was

heated under reflux until 2-(triphenylphosphanylidene)acetate disappeared as monitored by TLC. The solvent was evaporated under reduced pressure to afford the phosphonium salts.

**Step 2:** The mixture of the above phosphonium salt and triethylamine (2.2 equiv, 2.2 mmol) in  $\text{CH}_2\text{Cl}_2$  (20 mL) was stirred at room temperature for 1 h before addition of a solution of acyl chloride (1.0 equiv, 1.0 mmol) in  $\text{CH}_2\text{Cl}_2$  (20 mL) slowly over 30 min using a syringe pump. The mixture was stirred overnight before passing through a Buchner funnel packed with silica gel and washing several times with  $\text{CH}_2\text{Cl}_2$ . The combined filtrates were carefully concentrated under reduced pressure. The residue was purified by a flash column chromatography (eluent: 10–15% EtOAc in hexanes) to afford allenates 2.

Others have previously reported the synthesis of allenenes shown below. **2a-2i**<sup>[7-9]</sup> were synthesized according to the above general procedure, and all the spectroscopic data matched those reported.

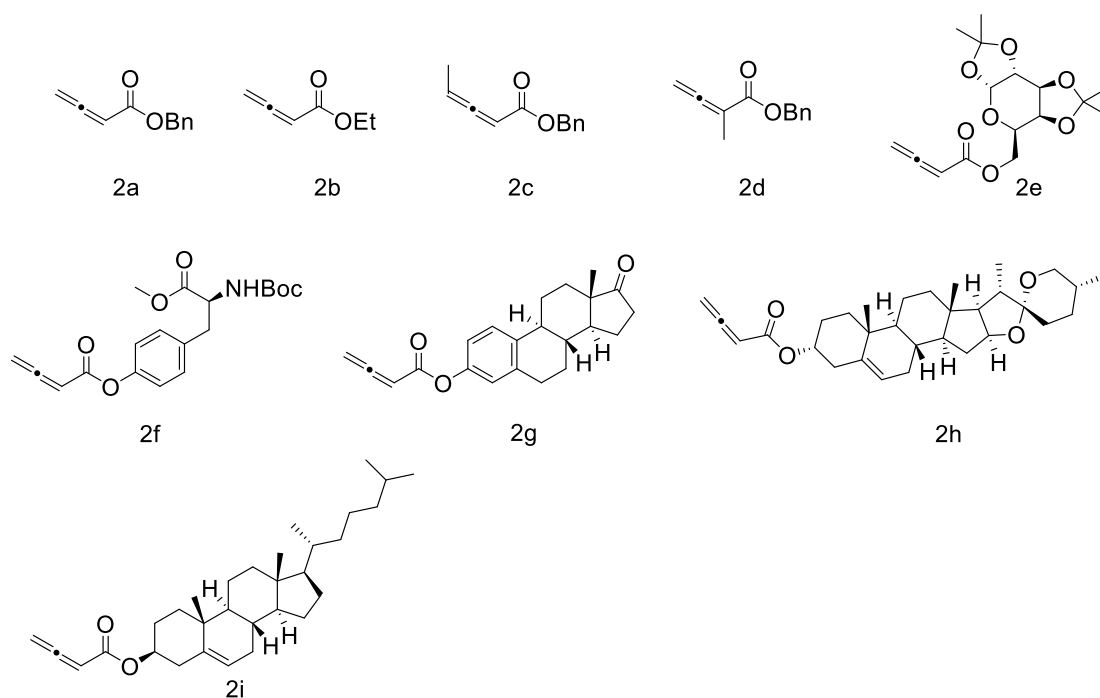

**(8*R*,9*S*,13*S*,14*S*)-13-methyl-17-oxo-7,8,9,11,12,13,14,15,16,17-decahydro-6*H*-cyclopenta[*a*]phenanthren-3-yl buta-2,3-dienoate (2g)**



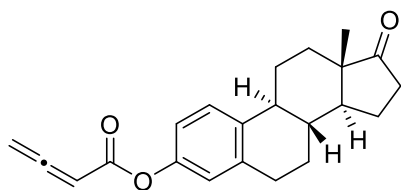

$^1\text{H}$  NMR (300 MHz,  $\text{CDCl}_3$ )  $\delta$  7.26 (s, 1H), 6.86 (d,  $J = 7.1$  Hz, 2H), 5.80 (t,  $J = 6.5$  Hz, 1H), 5.44 (s, 1H), 5.31 (d,  $J = 6.5$  Hz, 1H), 3.58 (s, 1H), 2.90 (dd,  $J = 9.4, 4.3$  Hz, 2H), 2.53 (d,  $J = 9.0$  Hz, 1H), 2.47 (d,  $J = 7.7$  Hz, 1H), 2.42 (s, 1H), 2.27 (s, 1H), 2.16 (t,  $J = 8.7$  Hz, 1H), 2.00 (d,  $J = 16.3$  Hz, 3H), 1.58 (s, 1H), 1.56 – 1.46 (m, 3H), 1.26 (d,  $J = 6.8$  Hz, 1H), 0.90 (s, 3H).

$^{13}\text{C}$  NMR (75 MHz,  $\text{CDCl}_3$ )  $\delta$  216.7, 169.9, 164.6, 148.8, 138.1, 137.6, 126.5, 121.6, 118.8, 87.8, 79.8, 50.6, 48.1, 44.3, 38.1, 36.0, 31.7, 29.5, 26.5, 25.9, 21.7, 14.0.

HRMS (ESI):  $m/z$  calculated for  $\text{C}_{31}\text{H}_{45}\text{O}_4^+$   $[\text{M}+\text{H}]^+$ , 337.1798; found, 337.1805

**(4R,5'R,6aR,6bS,8aS,8bR,9S,10R,11aS,12aS,12bS)-5',6a,8a,9-tetramethyl-1,3,3',4,4',5,5',6,6a,6b,6',7,8,8a,8b,9,11a,12,12a,12b-icosahydrospiro[naphtho[2',1':4,5]indeno[2,1-b]furan-10,2'-pyran]-4-yl buta-2,3-dienoate (2h)**

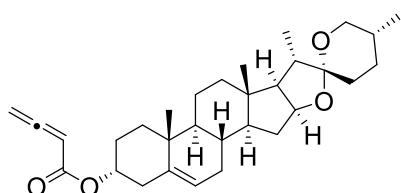

$^1\text{H}$  NMR (300 MHz,  $\text{CDCl}_3$ )  $\delta$  5.60 (t,  $J = 6.5$  Hz, 1H), 5.37 (d,  $J = 5.1$  Hz, 1H), 5.19 (d,  $J = 6.5$  Hz, 2H), 4.65 (dp,  $J = 11.0, 5.3$  Hz, 1H), 4.40 (q,  $J = 7.4$  Hz, 1H), 3.50 – 3.31 (m, 2H), 2.36 (s, 2H), 1.98 (dd,  $J = 11.6, 6.6$  Hz, 2H), 1.89 – 1.82 (m, 3H), 1.79 (s, 1H), 1.78 – 1.69 (m, 3H), 1.66 (d,  $J = 4.3$  Hz, 1H), 1.63 – 1.57 (m, 5H), 1.31 (s, 1H), 1.29 – 1.22 (m, 2H), 1.19 – 1.09 (m, 3H), 1.03 (s, 3H), 0.96 (d,  $J = 6.9$  Hz, 4H), 0.77 (d,  $J = 4.7$  Hz, 6H).

$^{13}\text{C}$  NMR (75 MHz,  $\text{CDCl}_3$ )  $\delta$  215.78, 165.28, 139.78, 122.55, 109.38, 88.50, 80.92, 79.35, 74.66, 66.95, 62.22, 56.56, 50.06, 41.74, 40.38, 39.84, 38.17, 37.07, 36.85, 32.17, 31.96, 31.53, 30.41, 29.81, 28.93, 27.82, 20.94, 19.46, 17.25, 16.39, 14.64.

HRMS (ESI):  $m/z$  calculated for  $\text{C}_{31}\text{H}_{45}\text{O}_4^+$   $[\text{M}+\text{H}]^+$ , 481.3313; found, 481.3323.

### 3. General Procedure for the synthesis of products

#### 3.1 General procedure 4 for the synthesis of isoquinolin-1(2*H*)-ones 3

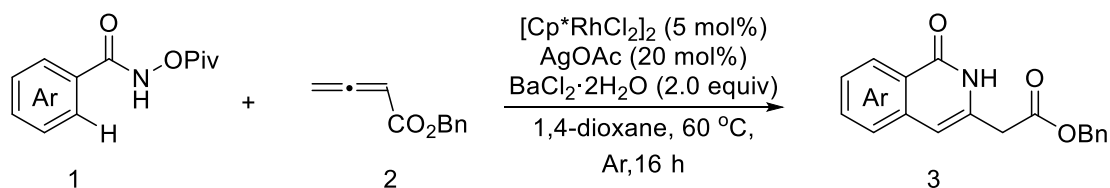

To a 10 mL reaction tube equipped with a stirring bar, corresponding N-OPiv benzamide (1, 0.2 mmol, 1.0 equiv), allenes 2 (1.2 equiv, 41.8 mg),  $[\text{Cp}^*\text{RhCl}_2]_2$  (5 mol%, 6.1 mg), AgOAc (20 mol%, 6.7 mg),  $\text{BaCl}_2 \cdot 2\text{H}_2\text{O}$  (2.0 equiv, 98 mg) and 1,4-dioxane (2 ml) were added under Ar atmosphere. Then the reaction tube was capped and placed in a pre-heated oil bath at 60 °C for the given time. After completion of the reaction as monitored by TLC, Then saturated aqueous  $\text{NH}_4\text{Cl}$  was added to quench the reaction. The aqueous layer was then extracted with EtOAc, and the combined organic layers were washed with brine, dried over anhydrous  $\text{Na}_2\text{SO}_4$ , filtered and concentrated. The residue was purified using column chromatography on silica gel (300-400 mesh), and Petroleum/EA mixture as eluent to yield the corresponding isoquinolin-1(2*H*)-ones 3.

#### 3.2 General procedure 5 for the synthesis of pyrimido[1,6-*a*]indol-1(2*H*)-ones (5)

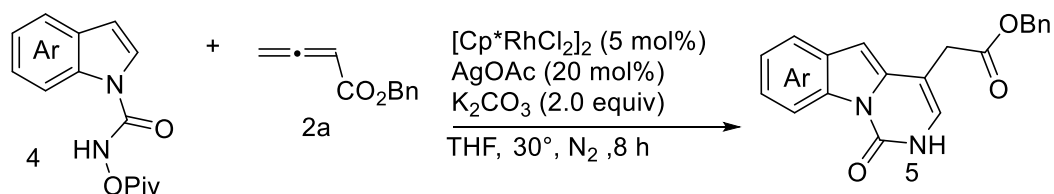

To a 10 mL reaction tube equipped with a stirring bar, corresponding N-(pivaloyloxy)indol (0.2 mmol, 1.0 equiv), allenes 2 (1.5 equiv, 52.6 mg),  $[\text{Cp}^*\text{RhCl}_2]_2$

(5 mol%, 6.1 mg), AgOAc (20 mol%, 6.7 mg), K<sub>2</sub>CO<sub>3</sub> (2.0 equiv, 55 mg) and THF (2 ml) were added under N<sub>2</sub> atmosphere. Then the reaction tube was capped and placed in a pre-heated oil bath at 30 °C for the given time. After completion of the reaction as monitored by TLC, Transfer to 25 ml flask and concentrate. The residue was purified using column chromatography on silica gel (300-400 mesh), and The residue was purified by flash column chromatography on silica gel using Petroleum ether /EtOAc as eluant.

### 3.3 Optimization conditions

#### 3.3.1 Optimization of the Rh(III)-caltlyzed regioselective annulation of benzamide with allene

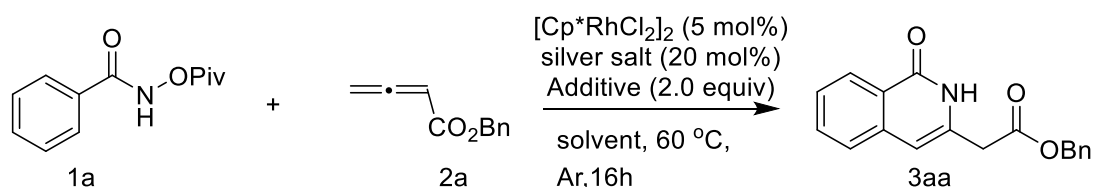

| Entry | 1a:2a | Catalyst                                             | Silver salt (x 20 mol%) | Additive (2.0 equiv)                  | Solvent (0.2 M)    | Yield (%) |
|-------|-------|------------------------------------------------------|-------------------------|---------------------------------------|--------------------|-----------|
| 1     | 1:1   | [Cp <sup>*</sup> RhCl <sub>2</sub> ] <sub>2</sub>    | AgSbF <sub>6</sub>      | NaOAc                                 | CH <sub>3</sub> CN | 44%       |
| 2     | 1:1   | [Cp <sup>*</sup> RhCl <sub>2</sub> ] <sub>2</sub>    | AgBF <sub>6</sub>       | NaOAc                                 | CH <sub>3</sub> CN | 40%       |
| 3     | 1:1   | [Cp <sup>*</sup> RhCl <sub>2</sub> ] <sub>2</sub>    | AgOAc                   | NaOAc                                 | CH <sub>3</sub> CN | 49%       |
| 4     | 1:1   | [Cp <sup>*</sup> RhCl <sub>2</sub> ] <sub>2</sub>    | AgOAc                   | PivOH                                 | CH <sub>3</sub> CN | 39%       |
| 5     | 1:1   | [Cp <sup>*</sup> RhCl <sub>2</sub> ] <sub>2</sub>    | AgOAc                   | Zn(OAc) <sub>2</sub>                  | CH <sub>3</sub> CN | 45%       |
| 6     | 1:1   | [Cp <sup>*</sup> RhCl <sub>2</sub> ] <sub>2</sub>    | AgOAc                   | BaCl <sub>2</sub> · 2H <sub>2</sub> O | CH <sub>3</sub> CN | 56%       |
| 7     | 1:1   | [Cp <sup>*</sup> RhCl <sub>2</sub> ] <sub>2</sub>    | AgOAc                   | BaCl <sub>2</sub> · 2H <sub>2</sub> O | THF                | 66%       |
| 8     | 1:1   | [Cp <sup>*</sup> RhCl <sub>2</sub> ] <sub>2</sub>    | AgOAc                   | BaCl <sub>2</sub> · 2H <sub>2</sub> O | DCM                | 35%       |
| 9     | 1:1   | [Cp <sup>*</sup> RhCl <sub>2</sub> ] <sub>2</sub>    | AgOAc                   | BaCl <sub>2</sub> · 2H <sub>2</sub> O | 1,4-dioxane        | 71%       |
| 10    | 1:1.2 | [Cp <sup>*</sup> RhCl <sub>2</sub> ] <sub>2</sub>    | AgOAc                   | BaCl <sub>2</sub> · 2H <sub>2</sub> O | 1,4-dioxane        | 83%       |
| 11    | 1:1.2 | [Cp <sup>*</sup> RhCl <sub>2</sub> ] <sub>2</sub>    | AgOAc                   | K <sub>2</sub> CO <sub>3</sub>        | THF                | 26%       |
| 12    | 1:1.2 | [Cp <sup>*</sup> IrCl <sub>2</sub> ] <sub>2</sub>    | AgOAc                   | BaCl <sub>2</sub> · 2H <sub>2</sub> O | 1,4-dioxane        | -         |
| 13    | 1:1.2 | Pd(OAc) <sub>2</sub>                                 | AgOAc                   | BaCl <sub>2</sub> · 2H <sub>2</sub> O | 1,4-dioxane        | -         |
| 14    | 1:1.2 | [Cp <sup>*</sup> Co(CO)I <sub>2</sub> ] <sub>2</sub> | AgOAc                   | BaCl <sub>2</sub> · 2H <sub>2</sub> O | 1,4-dioxane        | -         |

Conditions: 1a (0.2 mmol), isolated yields

### 3.3.2 Optimization of the Rh(III)-catalyzed regioselective annulation of indole-1-carboxamide with allene

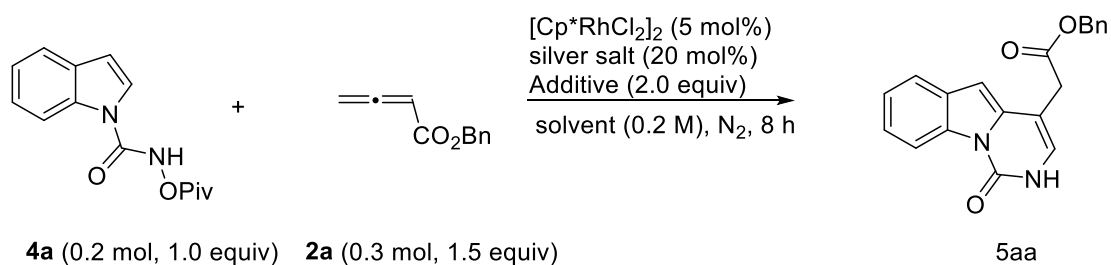

| Entry | Catalyst             | Silver salt (20 mol%)           | Additive (2.0 equiv)                  | Solvent            | Yield (%) |
|-------|----------------------|---------------------------------|---------------------------------------|--------------------|-----------|
| 1     | $[Cp^*RhCl_2]_2$     | AgOAc                           | AcOH                                  | CH <sub>3</sub> CN | 15%       |
| 2     | $[Cp^*RhCl_2]_2$     | AgOAc                           | NaOAc                                 | CH <sub>3</sub> CN | -         |
| 3     | $[Cp^*RhCl_2]_2$     | AgOAc                           | K <sub>3</sub> PO <sub>4</sub>        | CH <sub>3</sub> CN | 45%       |
| 4     | $[Cp^*RhCl_2]_2$     | AgOAc                           | Zn(OAc) <sub>2</sub>                  | CH <sub>3</sub> CN | 12%       |
| 5     | $[Cp^*RhCl_2]_2$     | AgOAc                           | NaH <sub>2</sub> PO <sub>4</sub>      | CH <sub>3</sub> CN | 20%       |
| 6     | $[Cp^*RhCl_2]_2$     | AgOAc                           | BaCl <sub>2</sub> · 2H <sub>2</sub> O | THF                | -         |
| 7     | $[Cp^*RhCl_2]_2$     | AgOAc                           | K <sub>3</sub> PO <sub>4</sub>        | MeOH               | -         |
| 8     | $[Cp^*RhCl_2]_2$     | AgOAc                           | K <sub>3</sub> PO <sub>4</sub>        | DCE                | -         |
| 9     | $[Cp^*RhCl_2]_2$     | AgOAc                           | K <sub>3</sub> PO <sub>4</sub>        | 1,4-dioxane        | 42%       |
| 10    | $[Cp^*RhCl_2]_2$     | AgOAc                           | K <sub>3</sub> PO <sub>4</sub>        | DCM                | 43%       |
| 11    | $[Cp^*RhCl_2]_2$     | AgOAc                           | K <sub>3</sub> PO <sub>4</sub>        | THF                | 71%       |
| 12    | $[Cp^*RhCl_2]_2$     | AgSbF <sub>6</sub>              | K <sub>3</sub> PO <sub>4</sub>        | THF                | 30%       |
| 13    | $[Cp^*RhCl_2]_2$     | Ag <sub>2</sub> CO <sub>3</sub> | K <sub>3</sub> PO <sub>4</sub>        | THF                | 60%       |
| 14    | $[Cp^*RhCl_2]_2$     | AgNO <sub>3</sub>               | K <sub>3</sub> PO <sub>4</sub>        | THF                | 44%       |
| 15    | $[Cp^*RhCl_2]_2$     | AgOAc                           | K <sub>2</sub> HPO <sub>4</sub>       | THF                | 27%       |
| 16    | $[Cp^*RhCl_2]_2$     | AgOAc                           | KO <sup>t</sup> Bu                    | THF                | 68%       |
| 17    | $[Cp^*RhCl_2]_2$     | AgOAc                           | K <sub>2</sub> CO <sub>3</sub>        | THF                | 87%       |
| 18    | $[Cp^*RhCl_2]_2$     | AgOAc                           | BaCl <sub>2</sub> · 2H <sub>2</sub> O | 1,4-dioxane        | -         |
| 19    | $[Cp^*IrCl_2]_2$     | AgOAc                           | K <sub>2</sub> CO <sub>3</sub>        | THF                | -         |
| 20    | Pd(OAc) <sub>2</sub> | AgOAc                           | K <sub>2</sub> CO <sub>3</sub>        | THF                | -         |
| 21    | $[Cp^*Co(CO)I_2]_2$  | AgOAc                           | K <sub>2</sub> CO <sub>3</sub>        | THF                | -         |

Conditions: 4a (0.2 mmol), isolated yields

## 4. Application and Preliminary mechanistic investigation

### 4.1 Large-scale synthesis

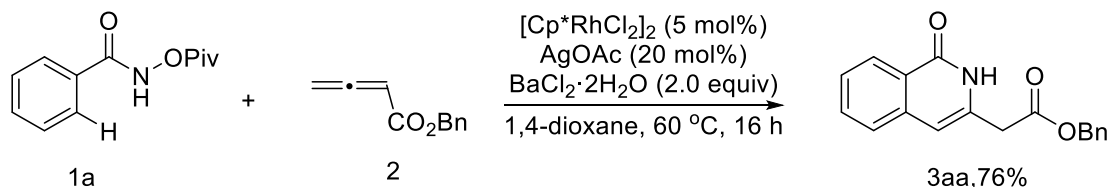

To a 100 mL reaction tube equipped with a stirring bar, corresponding N–OPiv benzamide 1 ( 1 mmol, 1.0 equiv), allenyl 2a (1.2 equiv, 209 mg),  $[\text{Cp}^*\text{RhCl}_2]_2$  (5 mol%, 30 mg), AgOAc (20 mol%, 34 mg),  $\text{BaCl}_2 \cdot 2\text{H}_2\text{O}$  (2.0 equiv, 490 mg) and 1,4-dioxane(10 ml) were added under Ar atmosphere. Then the reaction tube was capped and placed in a pre-heated oil bath at 60 °C for the given time. After completion of the reaction as monitored by TLC, Then saturated aqueous  $\text{NH}_4\text{Cl}$  was added to quench the reaction. The aqueous layer was then extracted with EtOAc, and the combined organic layers were washed with brine, dried over anhydrous  $\text{Na}_2\text{SO}_4$ , filtered and concentrated. The residue was purified by flash column chromatography on silica gel using Petroleum ether/EtOAc as eluant afforded as oil 3aa (223 mg, 76%)

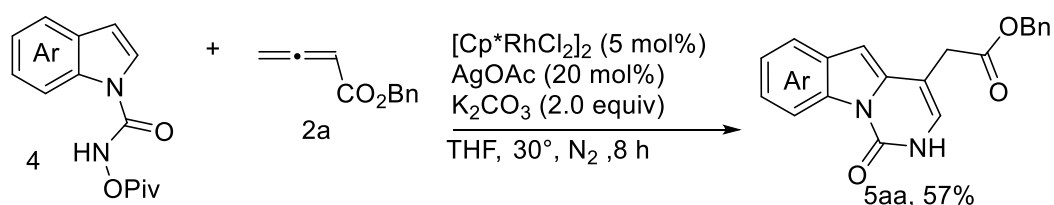

To a 35 mL reaction tube equipped with a stirring bar, corresponding N–OPiv benzamide 1 ( 1 mmol, 1.0 equiv), allenyl 2a (1.5 equiv, 261 mg),  $[\text{Cp}^*\text{RhCl}_2]_2$  (5 mol%, 30 mg), AgOAc (20 mol%, 34 mg),  $\text{K}_2\text{CO}_3$  (2.0 equiv, 276 mg) and THF (10 ml) were added under  $\text{N}_2$  atmosphere. Then the reaction tube was capped and placed in a pre-heated oil bath at 30 °C for the given time. After completion of the reaction as monitored by TLC, Transfer to 25 ml flask and concentrate. The residue was purified using column chromatography on silica gel (300-400 mesh), and The residue was

purified by flash column chromatography on silica gel using Petroleum ether /EtOAc as eluant afforded as oil 5aa (188 mg, 57%)

#### 4.2 Late-state functionalization of product

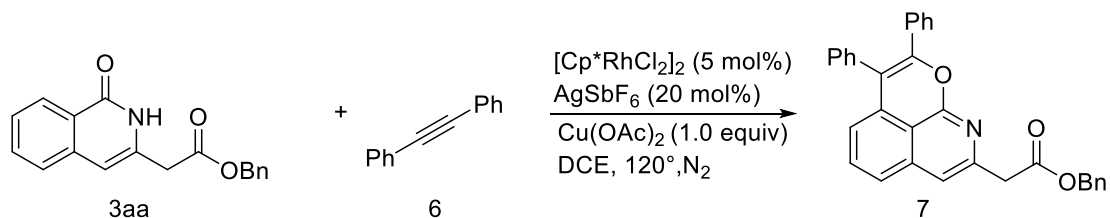

To an oven dried screw cap reaction tube, isoquinolin-1(2H)-one derivative 3aa (0.1 mmol, 1.0 equiv),  $[\text{Cp}^*\text{RhCl}_2]_2$  (5 mol%, 3.1 mg),  $\text{Cu}(\text{OAc})_2 \cdot \text{H}_2\text{O}$  (1.2 equiv, 0.1 mmol, 18.0 mg), diphenylacetylene (1.0 equiv, 0.1 mmol, 17.8 mg) and DCE (1.0 ml) were added under  $\text{N}_2$  atmosphere. After that, the reaction mixture was stirred at  $110^\circ\text{C}$  for 12 hours. The crude mixture was diluted with ethyl acetate, concentrated and purified by column chromatography on silica gel (300-400 mesh) and ethyl acetate /hexane as eluent (35/65) to yield corresponding annulation product in 68% yield (32.0 mg).

#### benzyl 2-(2,3-diphenylpyrano[4,3,2-ij]isoquinolin-8-yl)ethaneperoxoate(7)

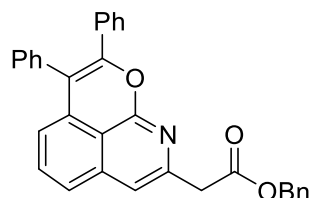

$^1\text{H}$  NMR (500 MHz,  $\text{CDCl}_3$ )  $\delta$  7.34 (t,  $J = 7.8$  Hz, 1H), 7.25 (d,  $J = 7.5$  Hz, 10H), 7.14 (s, 3H), 7.10 (d,  $J = 6.3$  Hz, 1H), 7.06 (d,  $J = 7.4$  Hz, 2H), 7.02 (s, 1H), 6.61 (d,  $J = 7.4$  Hz, 1H), 5.09 (s, 2H), 3.78 (s, 2H).

$^{13}\text{C}$  NMR (126 MHz,  $\text{CDCl}_3$ )  $\delta$  170.9, 159.6, 150.9, 147.6, 139.5, 136.0, 134.9, 134.4, 133.3, 132.6, 130.9, 129.5, 129.3, 128.9, 128.7, 128.4, 128.3, 128.1, 127.8, 121.0, 117.9, 117.9, 116.1, 114.6, 66.9, 43.6.

HRMS (ESI):  $m/z$  calculated for  $\text{C}_{32}\text{H}_{24}\text{NO}_4^+$   $[\text{M}+\text{H}]^+$ , 486.1700; found, 486.1705

### 4.3 Deuterium exchange experiment

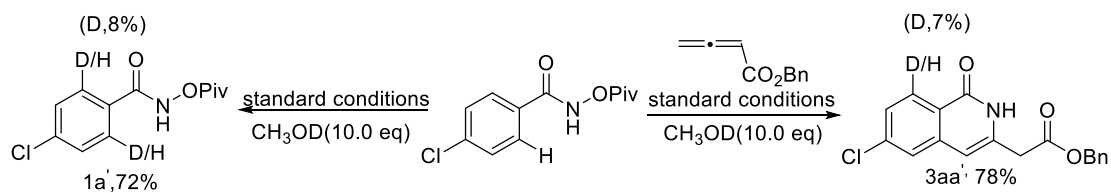

N-OPiv benzamide 1a (0.1 mmol, 1.0 equiv) was reacted with allenyl 2a in presence of CH<sub>3</sub>OD (10.0 equiv) under standard conditions. The reaction was monitored by TLC and stopped after 6 h., followed by column chromatography of the crude mixture gave the isoquinolin-1-(2*H*)-one product 3aa in 78% yield with 7% deuterium incorporation in the ortho proton. When the reaction was carried out in absence of allene coupling partner, the starting amide 1a was isolated in 72% yield with 8% deuterium incorporation.

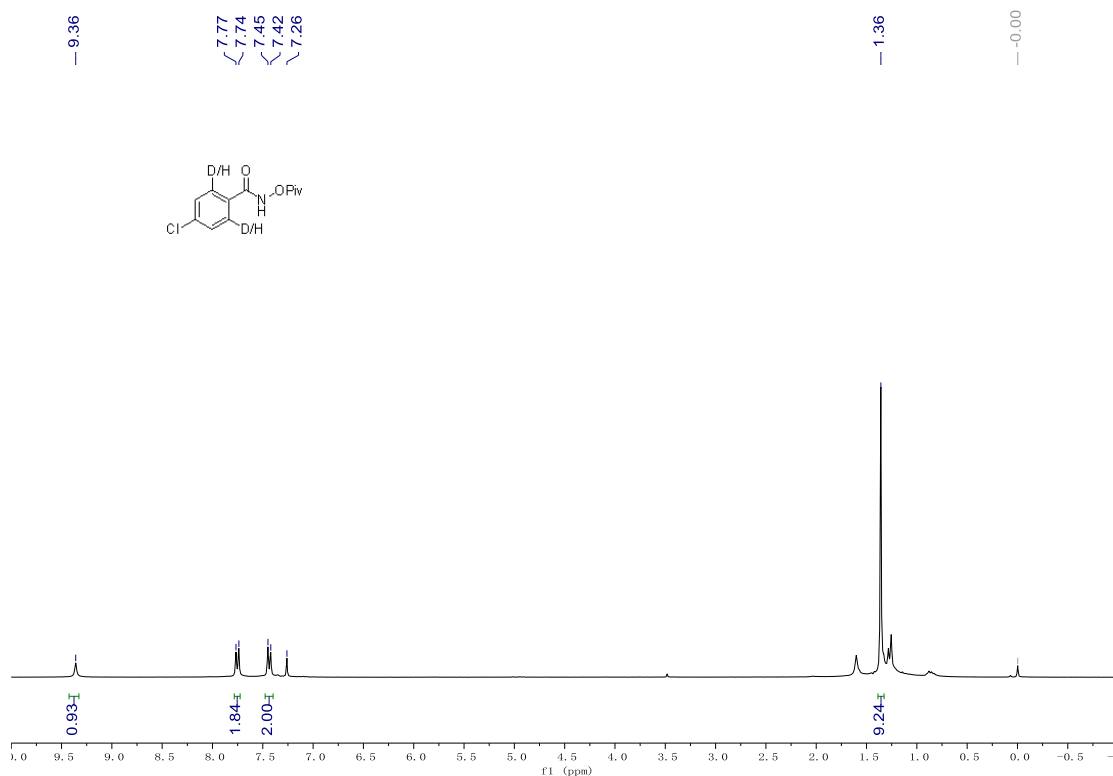

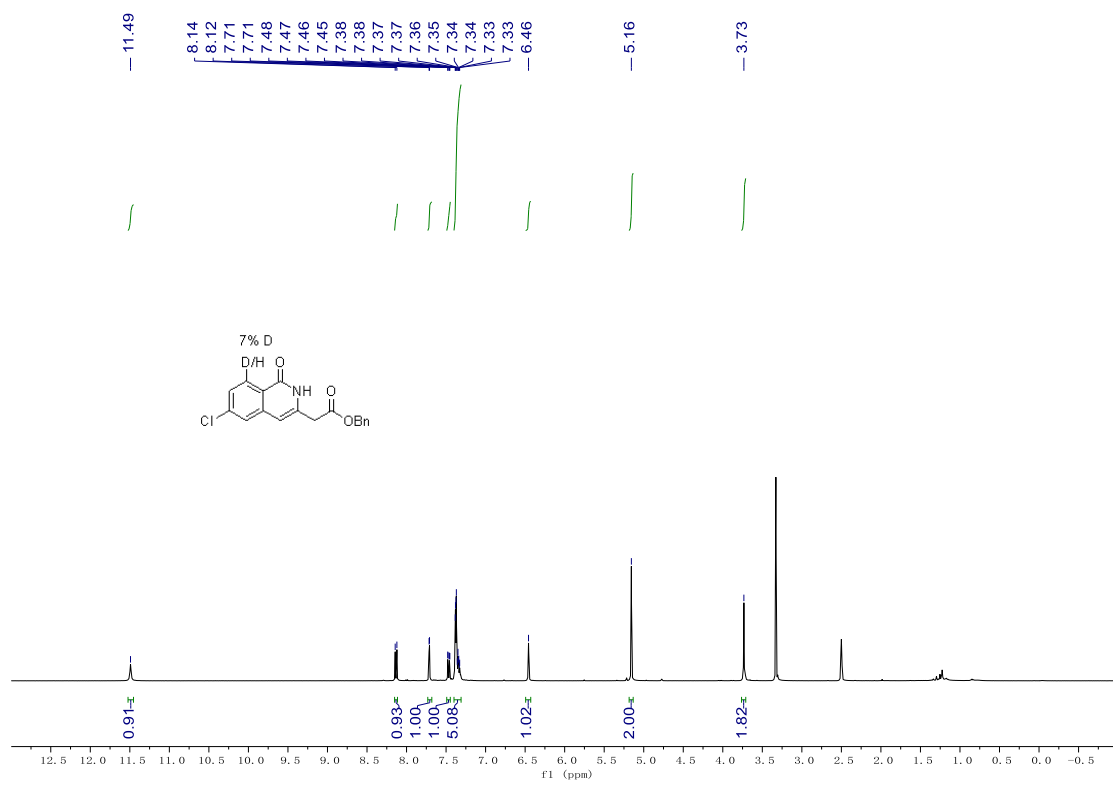



## 5. X-Ray crystal data for compound 30a and 5ja.

### Crystal structure of 30a

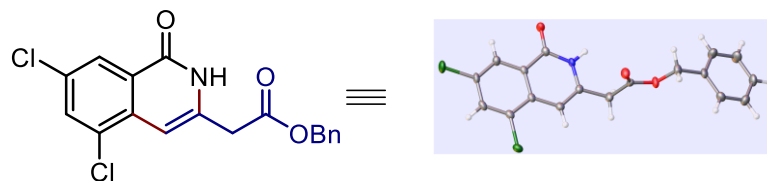

Figure S1: The crystal structure of 30a by X-ray analysis.

X-ray-quality crystal was obtained by slow diffusion of Petroleum ether into a methyl alcohol solution of 5ja at room temperature under air. Thermal ellipsoids drawn at the 50% probability level. A suitable crystal was selected and on a **SuperNova, Dual, Cu at zero, AtlasS2** diffractometer. The crystal was kept at 150.00(16) K during data collection. Using Olex2, the structure was solved with the SHELXT structure solution program using Intrinsic Phasing and refined with the SHELXL refinement package using Least Squares minimisation.

### Crystal structure determination of 30a

**Crystal Data** for  $C_{18}H_{13}Cl_2NO_3$  ( $M = 362.19$  g/mol): monoclinic, space group  $C2/c$  (no. 15),  $a = 30.7988(15)$  Å,  $b = 4.6614(3)$  Å,  $c = 22.7529(15)$  Å,  $\beta = 94.524(5)^\circ$ ,  $V = 3256.4(3)$  Å<sup>3</sup>,  $Z = 8$ ,  $T = 150.00(16)$  K,  $\mu(\text{Mo K}\alpha) = 0.415$  mm<sup>-1</sup>,  $D_{\text{calc}} = 1.478$  g/cm<sup>3</sup>, 6399 reflections measured ( $4.294^\circ \leq 2\theta \leq 49.996^\circ$ ), 2875 unique ( $R_{\text{int}} = 0.0380$ ,  $R_{\text{sigma}} = 0.0519$ ) which were used in all calculations. The final  $R_1$  was 0.0392 ( $I > 2\sigma(I)$ ) and  $wR_2$  was 0.0970 (all data).

### Table 1 Crystal data and structure refinement for 30a.

|                     |     |
|---------------------|-----|
| Identification code | 30a |
|---------------------|-----|

|                                               |                                                               |
|-----------------------------------------------|---------------------------------------------------------------|
| Empirical formula                             | $C_{18}H_{13}Cl_2NO_3$                                        |
| Formula weight                                | 362.19                                                        |
| Temperature/K                                 | 150.00(16)                                                    |
| Crystal system                                | monoclinic                                                    |
| Space group                                   | $C2/c$                                                        |
| $a/\text{\AA}$                                | 30.7988(15)                                                   |
| $b/\text{\AA}$                                | 4.6614(3)                                                     |
| $c/\text{\AA}$                                | 22.7529(15)                                                   |
| $\alpha/^\circ$                               | 90                                                            |
| $\beta/^\circ$                                | 94.524(5)                                                     |
| $\gamma/^\circ$                               | 90                                                            |
| Volume/ $\text{\AA}^3$                        | 3256.4(3)                                                     |
| Z                                             | 8                                                             |
| $\rho_{\text{calc}}/\text{g/cm}^3$            | 1.478                                                         |
| $\mu/\text{mm}^{-1}$                          | 0.415                                                         |
| F(000)                                        | 1488.0                                                        |
| Crystal size/ $\text{mm}^3$                   | $0.15 \times 0.12 \times 0.1$                                 |
| Radiation                                     | Mo $K\alpha$ ( $\lambda = 0.71073$ )                          |
| $2\Theta$ range for data collection/ $^\circ$ | 4.294 to 49.996                                               |
| Index ranges                                  | $-22 \leq h \leq 36, -4 \leq k \leq 5, -27 \leq l \leq 26$    |
| Reflections collected                         | 6399                                                          |
| Independent reflections                       | 2875 [ $R_{\text{int}} = 0.0380, R_{\text{sigma}} = 0.0519$ ] |
| Data/restraints/parameters                    | 2875/0/217                                                    |
| Goodness-of-fit on $F^2$                      | 1.061                                                         |

Final R indexes [ $I \geq 2\sigma(I)$ ]  $R_1 = 0.0392$ ,  $wR_2 = 0.0900$

Final R indexes [all data]  $R_1 = 0.0481$ ,  $wR_2 = 0.0970$

Largest diff. peak/hole /  $e \text{ \AA}^{-3}$  0.22/-0.23

## Refinement model description

**Table 2 Fractional Atomic Coordinates ( $\times 10^4$ ) and Equivalent Isotropic Displacement Parameters ( $\text{\AA}^2 \times 10^3$ ) for hn-cl.  $U_{\text{eq}}$  is defined as 1/3 of the trace of the orthogonalised  $U_{ij}$  tensor.**

| Atom | x         | y          | z          | U(eq)     |
|------|-----------|------------|------------|-----------|
| Cl1  | 4698.0(2) | 6703.0(13) | 6068.7(3)  | 38.01(19) |
| Cl2  | 4313.1(2) | -442.8(10) | 4256.4(2)  | 29.52(17) |
| O1   | 3010.1(4) | 8081(3)    | 5401.2(6)  | 27.3(4)   |
| O2   | 2621.1(5) | 5733(3)    | 3200.0(7)  | 29.5(4)   |
| O3   | 2014.4(4) | 3085(3)    | 3196.3(6)  | 27.1(4)   |
| N1   | 2856.9(5) | 4963(3)    | 4647.6(7)  | 21.9(4)   |
| C1   | 3137.7(6) | 6213(4)    | 5065.6(9)  | 22.1(5)   |
| C2   | 3586.2(6) | 5156(4)    | 5092.3(9)  | 20.6(4)   |
| C3   | 3888.0(6) | 6267(4)    | 5524.6(9)  | 24.4(5)   |
| C4   | 4308.6(7) | 5290(4)    | 5553.6(9)  | 25.8(5)   |
| C5   | 4441.3(7) | 3204(4)    | 5165.1(9)  | 25.6(5)   |
| C6   | 4143.0(7) | 2128(4)    | 4743.4(9)  | 23.5(5)   |
| C7   | 3704.3(6) | 3052(4)    | 4688.4(9)  | 20.5(5)   |
| C8   | 3381.8(7) | 1939(4)    | 4262.3(9)  | 23.3(5)   |
| C9   | 2966.2(7) | 2877(4)    | 4254.4(9)  | 22.1(5)   |
| C10  | 2595.4(7) | 1713(4)    | 3858.2(10) | 26.0(5)   |
| C11  | 2420.5(6) | 3776(4)    | 3388.6(9)  | 20.9(5)   |
| C12  | 1815.2(7) | 4891(5)    | 2725.3(10) | 31.1(5)   |
| C13  | 1376.3(7) | 3646(4)    | 2548.9(9)  | 26.0(5)   |
| C14  | 1326.1(7) | 1616(4)    | 2105.6(10) | 29.8(5)   |
| C15  | 920.6(7)  | 424(5)     | 1950.4(10) | 34.9(6)   |

**Table 2 Fractional Atomic Coordinates ( $\times 10^4$ ) and Equivalent Isotropic Displacement Parameters ( $\text{\AA}^2 \times 10^3$ ) for hn-cl.  $U_{\text{eq}}$  is defined as 1/3 of the trace of the orthogonalised  $U_{\text{IJ}}$  tensor.**

| Atom | x         | y       | z          | U(eq)   |
|------|-----------|---------|------------|---------|
| C16  | 564.9(7)  | 1273(5) | 2239.0(10) | 35.5(6) |
| C17  | 612.1(8)  | 3286(5) | 2679.3(11) | 40.8(6) |
| C18  | 1014.2(8) | 4476(5) | 2830.8(11) | 37.6(6) |

**Table 3 Anisotropic Displacement Parameters ( $\text{\AA}^2 \times 10^3$ ) for hn-cl. The Anisotropic displacement factor exponent takes the form:  $-2\pi^2[h^2a^2U_{11}+2hka*b*U_{12}+\dots]$ .**

| Atom | $U_{11}$ | $U_{22}$ | $U_{33}$ | $U_{23}$ | $U_{13}$ | $U_{12}$ |
|------|----------|----------|----------|----------|----------|----------|
| C11  | 22.1(3)  | 55.3(4)  | 34.9(4)  | -4.6(3)  | -9.0(2)  | -2.3(3)  |
| C12  | 25.2(3)  | 26.3(3)  | 37.4(3)  | 0.5(2)   | 4.9(2)   | 5.6(2)   |
| O1   | 18.5(8)  | 36.3(8)  | 27.0(8)  | -5.7(7)  | 2.3(6)   | 1.8(6)   |
| O2   | 23.6(8)  | 28.6(8)  | 35.8(9)  | 4.9(7)   | -0.5(7)  | -7.8(7)  |
| O3   | 17.5(8)  | 33.0(8)  | 29.7(9)  | 6.4(7)   | -5.0(6)  | -5.4(6)  |
| N1   | 13.3(9)  | 27.2(9)  | 24.9(10) | 1.0(8)   | -0.6(7)  | 0.0(7)   |
| C1   | 17.0(11) | 26.1(11) | 23.7(11) | 3.5(9)   | 3.6(9)   | -2.3(9)  |
| C2   | 16.1(10) | 23.6(10) | 22.2(11) | 7.6(9)   | 1.8(8)   | -0.7(8)  |
| C3   | 20.3(12) | 30.4(11) | 22.3(11) | 1.4(9)   | 1.3(9)   | -1.6(9)  |
| C4   | 17.4(11) | 32.6(11) | 26.3(12) | 6.6(10)  | -5.7(9)  | -3.7(9)  |
| C5   | 16.6(11) | 28.6(11) | 31.5(13) | 10.1(10) | 1.3(9)   | 1.9(9)   |
| C6   | 20.0(11) | 22.7(10) | 28.0(12) | 7.0(9)   | 3.7(9)   | 0.6(9)   |
| C7   | 18.3(11) | 20.8(10) | 22.2(11) | 7.5(8)   | 0.7(9)   | -1.4(8)  |
| C8   | 23.1(12) | 20.4(10) | 26.2(12) | 3.4(9)   | 2.1(9)   | -0.4(9)  |
| C9   | 23.1(11) | 21.6(10) | 21.4(11) | 3.6(9)   | 0.2(9)   | -2.9(9)  |
| C10  | 23.0(12) | 22.8(10) | 31.5(13) | 1.7(9)   | -1.3(9)  | -4.7(9)  |
| C11  | 16.6(11) | 22.1(10) | 23.8(11) | -6.4(9)  | 1.1(9)   | -1.2(9)  |
| C12  | 26.7(13) | 35.0(12) | 30.5(13) | 6.6(10)  | -6.0(10) | -1.6(10) |

**Table 3 Anisotropic Displacement Parameters ( $\text{\AA}^2 \times 10^3$ ) for hn-cl. The Anisotropic displacement factor exponent takes the form:  $-2\pi^2[h^2a^{*2}U_{11}+2hka^*b^*U_{12}+\dots]$ .**

| Atom | $U_{11}$ | $U_{22}$ | $U_{33}$ | $U_{23}$  | $U_{13}$ | $U_{12}$ |
|------|----------|----------|----------|-----------|----------|----------|
| C13  | 21.1(11) | 28.9(11) | 26.7(12) | 5.5(10)   | -5.5(9)  | 0.2(9)   |
| C14  | 22.8(12) | 35.5(12) | 31.3(13) | 0.5(10)   | 3.8(10)  | 3.9(10)  |
| C15  | 33.7(14) | 39.4(13) | 30.6(13) | -8.1(11)  | -2.7(10) | -2.9(11) |
| C16  | 20.3(12) | 47.0(14) | 38.2(14) | -1.4(12)  | -4.3(10) | -5.3(10) |
| C17  | 22.7(13) | 57.2(16) | 43.1(16) | -12.5(13) | 6.6(11)  | 0.4(11)  |
| C18  | 31.1(14) | 46.8(14) | 34.9(14) | -15.0(11) | 2.3(11)  | -0.6(11) |

**Table 4 Bond Lengths for 3oa.**

| Atom Atom | Length/ $\text{\AA}$ | Atom Atom | Length/ $\text{\AA}$ |
|-----------|----------------------|-----------|----------------------|
| C11 C4    | 1.739(2)             | C5 C6     | 1.370(3)             |
| C12 C6    | 1.741(2)             | C6 C7     | 1.414(3)             |
| O1 C1     | 1.242(2)             | C7 C8     | 1.430(3)             |
| O2 C11    | 1.200(2)             | C8 C9     | 1.351(3)             |
| O3 C11    | 1.332(2)             | C9 C10    | 1.499(3)             |
| O3 C12    | 1.459(2)             | C10 C11   | 1.505(3)             |
| N1 C1     | 1.365(3)             | C12 C13   | 1.496(3)             |
| N1 C9     | 1.381(3)             | C13 C14   | 1.383(3)             |
| C1 C2     | 1.463(3)             | C13 C18   | 1.385(3)             |
| C2 C3     | 1.398(3)             | C14 C15   | 1.387(3)             |
| C2 C7     | 1.411(3)             | C15 C16   | 1.379(3)             |
| C3 C4     | 1.370(3)             | C16 C17   | 1.372(3)             |
| C4 C5     | 1.396(3)             | C17 C18   | 1.376(3)             |

**Table 5 Bond Angles for 3oa.**

| Atom Atom Atom | Angle/ $^\circ$ | Atom Atom Atom | Angle/ $^\circ$ |
|----------------|-----------------|----------------|-----------------|
| C11 O3 C12     | 115.55(15)      | C6 C7 C8       | 123.88(19)      |

**Table 5 Bond Angles for 3oa.**

| Atom | Atom | Atom | Angle/°    | Atom | Atom | Atom | Angle/°    |
|------|------|------|------------|------|------|------|------------|
| C1   | N1   | C9   | 125.35(17) | C9   | C8   | C7   | 119.89(19) |
| O1   | C1   | N1   | 120.91(18) | N1   | C9   | C10  | 115.55(17) |
| O1   | C1   | C2   | 123.64(18) | C8   | C9   | N1   | 119.89(18) |
| N1   | C1   | C2   | 115.44(17) | C8   | C9   | C10  | 124.51(19) |
| C3   | C2   | C1   | 118.51(18) | C9   | C10  | C11  | 114.12(16) |
| C3   | C2   | C7   | 121.61(18) | O2   | C11  | O3   | 124.27(18) |
| C7   | C2   | C1   | 119.87(18) | O2   | C11  | C10  | 125.02(18) |
| C4   | C3   | C2   | 119.0(2)   | O3   | C11  | C10  | 110.68(16) |
| C3   | C4   | C11  | 120.38(17) | O3   | C12  | C13  | 106.96(16) |
| C3   | C4   | C5   | 121.59(19) | C14  | C13  | C12  | 120.5(2)   |
| C5   | C4   | C11  | 118.01(16) | C14  | C13  | C18  | 118.8(2)   |
| C6   | C5   | C4   | 118.98(19) | C18  | C13  | C12  | 120.7(2)   |
| C5   | C6   | C12  | 118.62(16) | C13  | C14  | C15  | 120.5(2)   |
| C5   | C6   | C7   | 122.25(19) | C16  | C15  | C14  | 119.8(2)   |
| C7   | C6   | C12  | 119.13(15) | C17  | C16  | C15  | 120.1(2)   |
| C2   | C7   | C6   | 116.60(18) | C16  | C17  | C18  | 120.0(2)   |
| C2   | C7   | C8   | 119.51(18) | C17  | C18  | C13  | 120.9(2)   |

**Table 6 Torsion Angles for 3oa.**

| A   | B   | C   | D   | Angle/°     | A  | B   | C   | D   | Angle/°     |
|-----|-----|-----|-----|-------------|----|-----|-----|-----|-------------|
| C11 | C4  | C5  | C6  | -177.94(15) | C5 | C6  | C7  | C2  | 0.0(3)      |
| C12 | C6  | C7  | C2  | -179.49(14) | C5 | C6  | C7  | C8  | -178.68(18) |
| C12 | C6  | C7  | C8  | 1.9(3)      | C6 | C7  | C8  | C9  | 177.72(18)  |
| O1  | C1  | C2  | C3  | 1.1(3)      | C7 | C2  | C3  | C4  | 0.3(3)      |
| O1  | C1  | C2  | C7  | -179.20(18) | C7 | C8  | C9  | N1  | 1.7(3)      |
| O3  | C12 | C13 | C14 | -90.6(2)    | C7 | C8  | C9  | C10 | -175.35(17) |
| O3  | C12 | C13 | C18 | 88.6(2)     | C8 | C9  | C10 | C11 | -111.1(2)   |
| N1  | C1  | C2  | C3  | -177.71(17) | C9 | N1  | C1  | O1  | 179.92(18)  |
| N1  | C1  | C2  | C7  | 2.0(3)      | C9 | N1  | C1  | C2  | -1.2(3)     |
| N1  | C9  | C10 | C11 | 71.7(2)     | C9 | C10 | C11 | O2  | 23.8(3)     |

**Table 6 Torsion Angles for 3oa.**

| A  | B  | C  | D   | Angle/°     | A   | B   | C   | D   | Angle/°     |
|----|----|----|-----|-------------|-----|-----|-----|-----|-------------|
| C1 | N1 | C9 | C8  | -0.6(3)     | C9  | C10 | C11 | O3  | -157.99(17) |
| C1 | N1 | C9 | C10 | 176.71(17)  | C11 | O3  | C12 | C13 | 176.35(17)  |
| C1 | C2 | C3 | C4  | 179.95(18)  | C12 | O3  | C11 | O2  | 0.0(3)      |
| C1 | C2 | C7 | C6  | -179.71(17) | C12 | O3  | C11 | C10 | -178.17(17) |
| C1 | C2 | C7 | C8  | -1.0(3)     | C12 | C13 | C14 | C15 | 178.75(19)  |
| C2 | C3 | C4 | C11 | 177.85(15)  | C12 | C13 | C18 | C17 | -178.4(2)   |
| C2 | C3 | C4 | C5  | -0.4(3)     | C13 | C14 | C15 | C16 | 0.2(3)      |
| C2 | C7 | C8 | C9  | -0.9(3)     | C14 | C13 | C18 | C17 | 0.8(3)      |
| C3 | C2 | C7 | C6  | 0.0(3)      | C14 | C15 | C16 | C17 | -0.1(4)     |
| C3 | C2 | C7 | C8  | 178.69(18)  | C15 | C16 | C17 | C18 | 0.4(4)      |
| C3 | C4 | C5 | C6  | 0.4(3)      | C16 | C17 | C18 | C13 | -0.8(4)     |
| C4 | C5 | C6 | C12 | 179.32(15)  | C18 | C13 | C14 | C15 | -0.5(3)     |
| C4 | C5 | C6 | C7  | -0.1(3)     |     |     |     |     |             |

**Table 7 Hydrogen Atom Coordinates ( $\text{\AA} \times 10^4$ ) and Isotropic Displacement Parameters ( $\text{\AA}^2 \times 10^3$ ) for 3oa.**

| Atom | x       | y       | z       | U(eq) |
|------|---------|---------|---------|-------|
| H1   | 2583.7  | 5533.48 | 4626.94 | 26    |
| H3   | 3802.6  | 7677.16 | 5794.09 | 29    |
| H5   | 4733.92 | 2542.07 | 5192.83 | 31    |
| H8   | 3459.46 | 541.95  | 3985.25 | 28    |
| H10A | 2356.12 | 1168.91 | 4102.1  | 31    |
| H10B | 2693.89 | -49.66  | 3665.65 | 31    |
| H12A | 1996.89 | 4906.67 | 2385.28 | 37    |
| H12B | 1785.81 | 6885.41 | 2866.47 | 37    |
| H14  | 1570.92 | 1034.8  | 1906    | 36    |
| H15  | 888.09  | -973.13 | 1646.11 | 42    |
| H16  | 286.69  | 461.9   | 2132.92 | 43    |
| H17  | 367.09  | 3858.75 | 2879.55 | 49    |
| H18  | 1043.79 | 5886.53 | 3132.7  | 45    |

## Crystal structure of 5ja

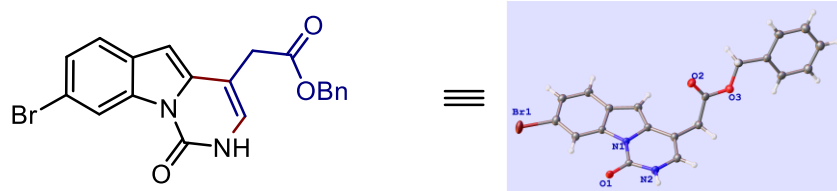

Figure S2: The crystal structure of 5ja by X-ray analysis.

X-ray-quality crystal was obtained by slow diffusion of Petroleum ether into a methyl alcohol solution of 5ja at room temperature under air. Thermal ellipsoids drawn at the 50% probability level. A suitable crystal was selected on a **SuperNova, Dual, Cu at zero, AtlasS2** diffractometer. The crystal was kept at 150.00(16) K during data collection. Using Olex2, the structure was solved with the SHELXT structure solution program using Intrinsic Phasing and refined with the SHELXL refinement package using Least Squares minimisation.

## Crystal structure determination of 5ja

**Crystal Data** for  $C_{20}H_{15}BrN_2O_3$  ( $M = 411.25$  g/mol): monoclinic, space group  $P2_1/c$  (no. 14),  $a = 5.3629(4)$  Å,  $b = 17.7232(15)$  Å,  $c = 18.1847(18)$  Å,  $\beta = 94.638(8)^\circ$ ,  $V = 1722.7(3)$  Å<sup>3</sup>,  $Z = 4$ ,  $T = 150.00(18)$  K,  $\mu(\text{Cu K}\alpha) = 3.452$  mm<sup>-1</sup>,  $D_{\text{calc}} = 1.586$  g/cm<sup>3</sup>, 6971 reflections measured ( $6.976^\circ \leq 2\Theta \leq 147.824^\circ$ ), 3388 unique ( $R_{\text{int}} = 0.1122$ ,  $R_{\text{sigma}} = 0.1316$ ) which were used in all calculations. The final  $R_1$  was 0.0913 ( $I > 2\sigma(I)$ ) and  $wR_2$  was 0.2834 (all data).

**Table 8 Crystal data and structure refinement for 5ja**

|                     |                        |
|---------------------|------------------------|
| Identification code | 5ja                    |
| Empirical formula   | $C_{20}H_{15}BrN_2O_3$ |



|                                           |                                                                |
|-------------------------------------------|----------------------------------------------------------------|
| Formula weight                            | 411.25                                                         |
| Temperature/K                             | 150.00(18)                                                     |
| Crystal system                            | monoclinic                                                     |
| Space group                               | P2 <sub>1</sub> /c                                             |
| a/Å                                       | 5.3629(4)                                                      |
| b/Å                                       | 17.7232(15)                                                    |
| c/Å                                       | 18.1847(18)                                                    |
| $\alpha$ /°                               | 90                                                             |
| $\beta$ /°                                | 94.638(8)                                                      |
| $\gamma$ /°                               | 90                                                             |
| Volume/Å <sup>3</sup>                     | 1722.7(3)                                                      |
| Z                                         | 4                                                              |
| $\rho_{\text{calc}}/\text{g}/\text{cm}^3$ | 1.586                                                          |
| $\mu/\text{mm}^{-1}$                      | 3.452                                                          |
| F(000)                                    | 832.0                                                          |
| Crystal size/mm <sup>3</sup>              | 0.15 × 0.13 × 0.1                                              |
| Radiation                                 | Cu K $\alpha$ ( $\lambda$ = 1.54184)                           |
| 2 $\Theta$ range for data collection/°    | 6.976 to 147.824                                               |
| Index ranges                              | -6 ≤ h ≤ 5, -21 ≤ k ≤ 19, -20 ≤ l ≤ 22                         |
| Reflections collected                     | 6971                                                           |
| Independent reflections                   | 3388 [ $R_{\text{int}}$ = 0.1122, $R_{\text{sigma}}$ = 0.1316] |
| Data/restraints/parameters                | 3388/363/235                                                   |
| Goodness-of-fit on F <sup>2</sup>         | 1.046                                                          |
| Final R indexes [ $I \geq 2\sigma(I)$ ]   | $R_1$ = 0.0913, $wR_2$ = 0.2469                                |

Final R indexes [all data]  $R_1 = 0.1268$ ,  $wR_2 = 0.2834$

Largest diff. peak/hole /  $e \text{ \AA}^{-3}$  1.68/-2.24

**Table 9 Fractional Atomic Coordinates ( $\times 10^4$ ) and Equivalent Isotropic Displacement Parameters ( $\text{\AA}^2 \times 10^3$ ) for br0525.  $U_{eq}$  is defined as 1/3 of the trace of the orthogonalised  $U_{ij}$  tensor.**

| Atom | x           | y         | z         | U(eq)    |
|------|-------------|-----------|-----------|----------|
| Br1  | 10417.8(14) | 3123.5(4) | 6826.8(4) | 38.2(3)  |
| O1   | 2847(7)     | 4660(2)   | 5463(2)   | 20.3(8)  |
| O2   | 7279(7)     | 7896(2)   | 5679(2)   | 26.7(9)  |
| O3   | 5256(7)     | 8882(2)   | 6126(2)   | 20.8(8)  |
| N1   | 4971(8)     | 5588(3)   | 6123(2)   | 15.7(8)  |
| N2   | 1402(9)     | 5872(3)   | 5378(2)   | 19.5(8)  |
| C1   | 8436(10)    | 5682(3)   | 6908(3)   | 18.7(9)  |
| C2   | 10580(11)   | 5408(3)   | 7313(3)   | 21.6(10) |
| C3   | 11122(10)   | 4644(3)   | 7278(3)   | 21.5(10) |
| C4   | 9520(11)    | 4156(3)   | 6862(3)   | 23.1(10) |
| C5   | 7407(10)    | 4401(3)   | 6449(3)   | 18.9(9)  |
| C6   | 6900(10)    | 5171(3)   | 6475(3)   | 17.7(9)  |
| C7   | 7358(10)    | 6420(3)   | 6809(3)   | 20.5(9)  |
| C8   | 5284(10)    | 6357(3)   | 6340(3)   | 18.2(9)  |
| C9   | 3426(11)    | 6877(3)   | 6053(3)   | 19.8(9)  |
| C10  | 1533(10)    | 6619(3)   | 5591(3)   | 20.2(9)  |
| C11  | 3048(9)     | 5325(3)   | 5648(3)   | 15.1(8)  |
| C12  | 3475(10)    | 7689(3)   | 6306(3)   | 20.4(9)  |
| C13  | 5562(10)    | 8148(3)   | 6000(3)   | 19.1(9)  |
| C14  | 7074(10)    | 9371(3)   | 5826(3)   | 20.6(10) |
| C15  | 6347(10)    | 10178(3)  | 5912(3)   | 19.2(9)  |
| C16  | 4326(10)    | 10414(3)  | 6281(3)   | 21.8(10) |
| C17  | 3830(11)    | 11184(3)  | 6347(3)   | 23.8(10) |
| C18  | 5303(12)    | 11719(4)  | 6049(3)   | 26.2(11) |
| C19  | 7325(11)    | 11482(4)  | 5687(3)   | 27.5(11) |
| C20  | 7872(11)    | 10719(3)  | 5612(3)   | 23.6(10) |

**Table 10 Anisotropic Displacement Parameters ( $\text{\AA}^2 \times 10^3$ ) for br0525. The Anisotropic displacement factor exponent takes the form:  $-2\pi^2[h^2a^{*2}U_{11}+2hka^*b^*U_{12}+\dots]$ .**

| Atom | $U_{11}$ | $U_{22}$ | $U_{33}$ | $U_{23}$ | $U_{13}$ | $U_{12}$ |
|------|----------|----------|----------|----------|----------|----------|
| Br1  | 36.8(5)  | 24.4(5)  | 50.3(5)  | 0.7(3)   | -15.6(3) | 11.9(3)  |
| O1   | 15.0(16) | 16.6(13) | 27.5(17) | -2.7(12) | -9.9(13) | -0.9(12) |
| O2   | 18.6(16) | 23.4(18) | 38.0(19) | 2.5(16)  | 1.3(14)  | 3.2(14)  |
| O3   | 19.7(14) | 18.9(12) | 23.7(14) | -1.4(11) | 0.1(11)  | -1.2(11) |
| N1   | 14.1(13) | 16.8(13) | 15.3(14) | -0.5(11) | -5.0(10) | 0.4(11)  |
| N2   | 16.4(14) | 18.8(13) | 22.0(15) | -0.6(12) | -7.4(12) | 0.7(11)  |
| C1   | 17.7(14) | 18.3(14) | 19.3(16) | 0.2(12)  | -3.5(12) | -1.0(12) |
| C2   | 18.8(15) | 22.4(15) | 22.1(17) | -0.3(13) | -7.4(13) | -1.3(13) |
| C3   | 18.0(16) | 23.8(14) | 21.8(17) | 0.6(13)  | -3.2(13) | 1.9(12)  |
| C4   | 22.6(15) | 22.2(16) | 23.3(17) | -0.4(13) | -4.8(13) | 3.5(13)  |
| C5   | 19.4(15) | 17.2(14) | 19.5(16) | -1.4(13) | -2.8(12) | 0.4(13)  |
| C6   | 16.1(14) | 17.1(13) | 18.8(16) | 1.6(12)  | -5.0(11) | 0.2(11)  |
| C7   | 19.2(15) | 17.8(15) | 23.0(16) | -0.6(13) | -6.9(12) | -2.1(12) |
| C8   | 16.9(14) | 16.6(14) | 20.1(15) | -0.4(12) | -4.8(12) | -1.0(11) |
| C9   | 18.8(15) | 18.2(14) | 21.6(16) | 0.6(12)  | -3.0(12) | 1.4(11)  |
| C10  | 18.3(15) | 19.9(15) | 21.9(16) | -1.4(13) | -2.0(12) | 1.8(12)  |
| C11  | 12.5(14) | 16.6(13) | 15.8(15) | -0.8(11) | -2.1(11) | -1.3(11) |
| C12  | 18.2(16) | 19.7(14) | 22.8(17) | -0.8(13) | -2.1(13) | 0.7(13)  |
| C13  | 15.7(15) | 17.9(13) | 22.6(16) | 0.3(12)  | -5.6(12) | 1.0(11)  |
| C14  | 18.3(16) | 20.2(14) | 22.7(17) | 0.3(13)  | -2.1(14) | -1.0(12) |
| C15  | 16.5(15) | 20.3(14) | 19.9(16) | 0.2(13)  | -4.7(12) | 0.0(12)  |
| C16  | 17.1(16) | 22.8(15) | 24.5(17) | 0.8(13)  | -3.8(13) | -0.3(13) |
| C17  | 23.2(17) | 24.3(14) | 23.2(17) | -0.4(13) | -1.3(14) | 2.0(13)  |
| C18  | 26.2(17) | 23.8(16) | 28.0(18) | 0.1(14)  | -2.0(14) | 0.7(13)  |
| C19  | 26.5(17) | 25.2(15) | 30.4(18) | 0.8(14)  | -1.2(14) | -1.2(14) |
| C20  | 20.6(16) | 23.1(14) | 26.1(18) | 0.7(13)  | -3.2(14) | -2.9(13) |

**Table 11 Bond Lengths for 5ja.**

| Atom | Atom | Length/ $\text{\AA}$ | Atom | Atom | Length/ $\text{\AA}$ |
|------|------|----------------------|------|------|----------------------|
| Br1  | C4   | 1.895(6)             | C4   | C5   | 1.378(8)             |

|    |     |          |     |     |          |
|----|-----|----------|-----|-----|----------|
| O1 | C11 | 1.228(6) | C5  | C6  | 1.394(8) |
| O2 | C13 | 1.214(7) | C7  | C8  | 1.350(7) |
| O3 | C13 | 1.333(7) | C8  | C9  | 1.425(7) |
| O3 | C14 | 1.444(6) | C9  | C10 | 1.344(8) |
| N1 | C6  | 1.386(7) | C9  | C12 | 1.512(7) |
| N1 | C8  | 1.425(7) | C12 | C13 | 1.525(7) |
| N1 | C11 | 1.372(6) | C14 | C15 | 1.495(8) |
| N2 | C10 | 1.380(7) | C15 | C16 | 1.384(7) |
| N2 | C11 | 1.374(7) | C15 | C20 | 1.399(8) |
| C1 | C2  | 1.401(7) | C16 | C17 | 1.396(8) |
| C1 | C6  | 1.419(7) | C17 | C18 | 1.374(8) |
| C1 | C7  | 1.435(8) | C18 | C19 | 1.379(8) |
| C2 | C3  | 1.387(8) | C19 | C20 | 1.393(8) |
| C3 | C4  | 1.398(8) |     |     |          |

**Table 12 Bond Angles for 5ja.**

| Atom | Atom | Atom | Angle/°  | Atom | Atom | Atom | Angle/°  |
|------|------|------|----------|------|------|------|----------|
| C13  | O3   | C14  | 115.1(4) | C8   | C9   | C12  | 120.6(5) |
| C6   | N1   | C8   | 108.4(4) | C10  | C9   | C8   | 118.7(5) |
| C11  | N1   | C6   | 127.2(5) | C10  | C9   | C12  | 120.5(5) |
| C11  | N1   | C8   | 124.4(5) | C9   | C10  | N2   | 121.4(5) |
| C11  | N2   | C10  | 124.0(5) | O1   | C11  | N1   | 122.9(5) |
| C2   | C1   | C6   | 119.0(5) | O1   | C11  | N2   | 122.6(5) |
| C2   | C1   | C7   | 133.4(5) | N1   | C11  | N2   | 114.5(5) |
| C6   | C1   | C7   | 107.6(5) | C9   | C12  | C13  | 113.1(4) |
| C3   | C2   | C1   | 118.8(5) | O2   | C13  | O3   | 123.4(5) |
| C2   | C3   | C4   | 120.4(5) | O2   | C13  | C12  | 125.9(5) |
| C3   | C4   | Br1  | 117.9(4) | O3   | C13  | C12  | 110.7(5) |
| C5   | C4   | Br1  | 119.0(4) | O3   | C14  | C15  | 110.2(4) |
| C5   | C4   | C3   | 123.0(5) | C16  | C15  | C14  | 124.2(5) |
| C4   | C5   | C6   | 116.3(5) | C16  | C15  | C20  | 119.1(5) |
| N1   | C6   | C1   | 107.1(5) | C20  | C15  | C14  | 116.7(5) |

**Table 12 Bond Angles for 5ja.**

| Atom Atom Atom | Angle/°  | Atom Atom Atom | Angle/°  |
|----------------|----------|----------------|----------|
| N1 C6 C5       | 130.3(5) | C15 C16 C17    | 120.0(5) |
| C5 C6 C1       | 122.6(5) | C18 C17 C16    | 121.4(5) |
| C8 C7 C1       | 107.9(5) | C17 C18 C19    | 118.5(6) |
| C7 C8 N1       | 109.0(5) | C18 C19 C20    | 121.5(6) |
| C7 C8 C9       | 134.0(5) | C19 C20 C15    | 119.5(5) |
| C9 C8 N1       | 116.9(5) |                |          |

**Table 13 Torsion Angles for 5ja.**

| A B C D        | Angle/°   | A B C D         | Angle/°   |
|----------------|-----------|-----------------|-----------|
| Br1 C4 C5 C6   | -177.6(4) | C8 N1 C6 C5     | 179.4(5)  |
| O3 C14 C15 C16 | 4.7(8)    | C8 N1 C11 O1    | 179.0(5)  |
| O3 C14 C15 C20 | -176.9(5) | C8 N1 C11 N2    | 0.9(7)    |
| N1 C8 C9 C10   | -1.0(7)   | C8 C9 C10 N2    | -1.9(8)   |
| N1 C8 C9 C12   | 174.5(4)  | C8 C9 C12 C13   | 72.8(6)   |
| C1 C2 C3 C4    | -1.7(8)   | C9 C12 C13 O2   | -10.8(8)  |
| C1 C7 C8 N1    | -0.2(6)   | C9 C12 C13 O3   | 168.7(4)  |
| C1 C7 C8 C9    | 178.0(6)  | C10 N2 C11 O1   | 178.0(5)  |
| C2 C1 C6 N1    | -178.6(5) | C10 N2 C11 N1   | -4.0(7)   |
| C2 C1 C6 C5    | 1.4(8)    | C10 C9 C12 C13  | -111.8(6) |
| C2 C1 C7 C8    | 178.7(6)  | C11 N1 C6 C1    | 179.9(4)  |
| C2 C3 C4 Br1   | 178.9(4)  | C11 N1 C6 C5    | -0.1(9)   |
| C2 C3 C4 C5    | 2.4(9)    | C11 N1 C8 C7    | -179.9(5) |
| C3 C4 C5 C6    | -1.2(8)   | C11 N1 C8 C9    | 1.5(7)    |
| C4 C5 C6 N1    | 179.2(5)  | C11 N2 C10 C9   | 4.6(8)    |
| C4 C5 C6 C1    | -0.7(8)   | C12 C9 C10 N2   | -177.4(5) |
| C6 N1 C8 C7    | 0.6(6)    | C13 O3 C14 C15  | 172.4(4)  |
| C6 N1 C8 C9    | -178.0(5) | C14 O3 C13 O2   | 2.4(8)    |
| C6 N1 C11 O1   | -1.6(8)   | C14 O3 C13 C12  | -177.2(4) |
| C6 N1 C11 N2   | -179.7(5) | C14 C15 C16 C17 | 178.5(5)  |
| C6 C1 C2 C3    | -0.1(8)   | C14 C15 C20 C19 | -178.7(5) |
| C6 C1 C7 C8    | -0.2(6)   | C15 C16 C17 C18 | 0.4(9)    |

**Table 13 Torsion Angles for 5ja.**

| A  | B  | C  | D   | Angle/°   | A   | B   | C   | D   | Angle/°  |
|----|----|----|-----|-----------|-----|-----|-----|-----|----------|
| C7 | C1 | C2 | C3  | -178.9(6) | C16 | C15 | C20 | C19 | -0.2(8)  |
| C7 | C1 | C6 | N1  | 0.5(6)    | C16 | C17 | C18 | C19 | -0.8(9)  |
| C7 | C1 | C6 | C5  | -179.6(5) | C17 | C18 | C19 | C20 | 0.8(10)  |
| C7 | C8 | C9 | C10 | -179.1(6) | C18 | C19 | C20 | C15 | -0.2(10) |
| C7 | C8 | C9 | C12 | -3.6(9)   | C20 | C15 | C16 | C17 | 0.2(8)   |
| C8 | N1 | C6 | C1  | -0.6(5)   |     |     |     |     |          |

**Table 14 Hydrogen Atom Coordinates ( $\text{\AA} \times 10^4$ ) and Isotropic Displacement Parameters ( $\text{\AA}^2 \times 10^3$ ) for 5ja.**

| Atom | x        | y        | z       | U(eq) |
|------|----------|----------|---------|-------|
| H2   | 219.59   | 5740.14  | 5055.49 | 23    |
| H2A  | 11619.31 | 5731.39  | 7599.38 | 26    |
| H3   | 12561.4  | 4455.22  | 7533.2  | 26    |
| H5   | 6376     | 4069.71  | 6167.44 | 23    |
| H7   | 7978.56  | 6862.38  | 7029.21 | 25    |
| H10  | 285.13   | 6950.65  | 5412.14 | 24    |
| H12A | 3684.54  | 7702.09  | 6840.66 | 25    |
| H12B | 1880.17  | 7922.26  | 6153.17 | 25    |
| H14A | 7175.09  | 9257.56  | 5307.04 | 25    |
| H14B | 8708.44  | 9283.24  | 6080.16 | 25    |
| H16  | 3299.47  | 10061    | 6483.67 | 26    |
| H17  | 2472.8   | 11336.55 | 6597.76 | 29    |
| H18  | 4944.19  | 12230.17 | 6090.92 | 31    |
| H19  | 8347.48  | 11840.24 | 5488.71 | 33    |
| H20  | 9241.14  | 10570.03 | 5364.66 | 28    |

## 6. Characterization Data

### benzyl 2-(1-oxo-1,2-dihydroisoquinolin-3-yl)acetate (**3aa**)

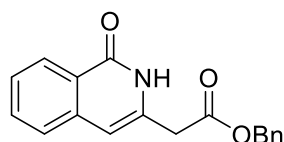

Prepared from 1a (0.2 mmol, 1.0 equiv) and 2a (0.24 mmol, 1.2 equiv) according to the general procedure 4, Purification by flash column (EtOAc/Petroleum Ether = 1/3) afforded **3aa** (49 mg, 83% yield) as solid.

R<sub>f</sub> = 0.36 (EtOAc/Petroleum Ether = 1/2)

<sup>1</sup>H NMR (300 MHz, CDCl<sub>3</sub>) δ 11.05 (s, 1H), 8.35 (d, *J* = 8.0 Hz, 1H), 7.64 (t, *J* = 7.5 Hz, 1H), 7.45 (dd, *J* = 14.2, 7.3 Hz, 2H), 7.37-7.29 (m, 5H), 6.41 (s, 1H), 5.18 (s, 2H), 3.72 (s, 2H).

<sup>13</sup>C NMR (75 MHz, CDCl<sub>3</sub>) δ 169.1, 164.2, 138.1, 135.4, 133.4, 132.8, 128.7, 128.6, 128.5, 127.6, 126.7, 126.1, 125.1, 106.5, 67.5, 38.8.

HRMS (ESI): *m/z* calculated for C<sub>18</sub>H<sub>16</sub>NO<sub>3</sub><sup>+</sup> [M+H]<sup>+</sup>, 294.1125; found, 294.1136.

### benzyl 2-(6-methyl-1-oxo-1,2-dihydroisoquinolin-3-yl)acetate (**3ba**)

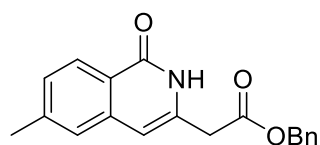

Prepared from 1b (0.2 mmol, 1.0 equiv) and 2a (0.24 mmol, 1.2 equiv) according to the general procedure 4, Purification by flash column (EtOAc/Petroleum Ether = 1/3) afforded **3ba** (31 mg, 50% yield) as solid.

R<sub>f</sub> = 0.34 (EtOAc/Petroleum Ether = 1/2)

<sup>1</sup>H NMR (300 MHz, DMSO-*d*<sub>6</sub>) δ 11.27 (s, 1H), 8.03 (d, *J* = 8.1 Hz, 1H), 7.40-7.27 (m, 7H), 7.27 (d, *J* = 8.4 Hz, 1H), 6.38 (s, 1H), 5.15 (s, 2H), 3.71 (s, 2H), 2.41 (s, 3H).

$^{13}\text{C}$  NMR (75 MHz, DMSO- $d_6$ )  $\delta$  169.3, 162.2, 142.6, 137.9, 135.9, 135.1, 128.5, 128.1, 128.0, 127.7, 126.6, 125.6, 122.7, 104.9, 66.1, 37.7, 21.3.

HRMS (ESI):  $m/z$  calculated for  $\text{C}_{19}\text{H}_{18}\text{NO}_3^+$   $[\text{M}+\text{H}]^+$ , 308.1281; found, 308.1292.

**benzyl 2-(6-methoxy-1-oxo-1,2-dihydroisoquinolin-3-yl)acetate (3ca)**

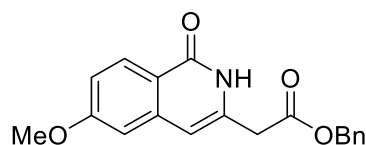

Prepared from 1c (0.2 mmol, 1.0 equiv) and 2a (0.24 mmol, 1.2 equiv) according to the general procedure 4, Purification by flash column (EtOAc/Petroleum Ether = 1/3) afforded **3ca** (26 mg, 40% yield) as solid.

R<sub>f</sub> = 0.22 (EtOAc/Petroleum Ether = 1/2)

$^1\text{H}$  NMR (300 MHz, DMSO- $d_6$ )  $\delta$  11.17 (s, 1H), 8.05 (d,  $J$  = 9.5 Hz, 1H), 7.42-7.32 (m, 5H), 7.05-7.00 (m, 2H), 6.38 (s, 1H), 5.15 (s, 2H), 3.85 (s, 3H), 3.70 (s, 2H).

$^{13}\text{C}$  NMR (75 MHz, DMSO- $d_6$ )  $\delta$  169.2, 162.4, 161.9, 139.9, 135.9, 135.6, 128.6, 128.4, 128.0, 127.9, 118.5, 115.4, 107.0, 104.8, 66.0, 55.4, 37.7.

HRMS (ESI):  $m/z$  calculated for  $\text{C}_{19}\text{H}_{18}\text{NO}_4^+$   $[\text{M}+\text{H}]^+$ , 324.1230; found, 324.1242.

**benzyl 2-(1-oxo-6-(trifluoromethyl)-1,2-dihydroisoquinolin-3-yl)acetate (3da)**

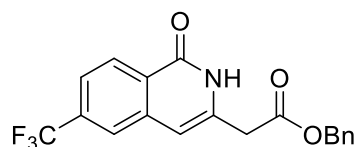

Prepared from 1d (0.2 mmol, 1.0 equiv) and 2a (0.24 mmol, 1.2 equiv) according to the general procedure 4, Purification by flash column (EtOAc/Petroleum Ether = 1/3) afforded **3da** (56 mg, 78% yield) as solid.

R<sub>f</sub> = 0.31 (EtOAc/Petroleum Ether = 1/2)

$^1\text{H}$  NMR (500 MHz,  $\text{CDCl}_3$ )  $\delta$  11.51 (s, 1H), 8.42 (d,  $J$  = 8.4 Hz, 1H), 7.75 (s, 1H), 7.61 (d,  $J$  = 8.4 Hz, 1H), 7.37 – 7.29 (m, 5H), 6.47 (s, 1H), 5.19 (s, 2H), 3.76 (s, 2H).



$^{13}\text{C}$  NMR (126 MHz,  $\text{CDCl}_3$ )  $\delta$  168.81, 163.58, 138.03, 135.30, 135.24, 134.45 (q,  $J_{\text{C-F}} = 32.8$  Hz), 128.76, 128.67, 128.62, 128.50, 126.0 (q,  $J_{\text{C-F}} = 280.99$ ) 123.47 (q,  $J_{\text{C-F}} = 3.78$  Hz), 123.41, 122.7 (q,  $J_{\text{C-F}} = 3.78$ ), 106.28, 67.60, 38.66.

HRMS (ESI):  $m/z$  calculated for  $\text{C}_{19}\text{H}_{14}\text{F}_3\text{NaNO}_3^+$   $[\text{M}+\text{Na}]^+$ , 384.0818; found, 384.0824.

**methyl 3-(2-(benzyloxy)-2-oxoethyl)-1-oxo-1,2-dihydroisoquinoline-6-carboxylate (3ea)**

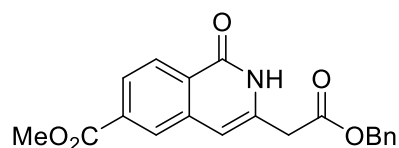

Prepared from 1e (0.2 mmol, 1.0 equiv) and 2a (0.24 mmol, 1.2 equiv) according to the general procedure 4, Purification by flash column (EtOAc/Petroleum Ether = 1/3) afforded **3ea** (65 mg, 93% yield) as solid.

$R_f = 0.28$  (EtOAc/Petroleum Ether = 1/2)

$^1\text{H}$  NMR (300 MHz,  $\text{DMSO-}d_6$ )  $\delta$  11.60 (s, 1H), 8.26 (d,  $J = 8.4$  Hz, 1H), 8.19 (s, 1H), 7.94 (d,  $J = 6.8$  Hz, 1H), 7.44-7.30 (m, 5H), 6.63 (s, 1H), 5.16 (s, 2H), 3.91 (s, 3H), 3.75 (s, 2H).

$^{13}\text{C}$  NMR (75 MHz,  $\text{DMSO-}d_6$ )  $\delta$  169.1, 165.8, 161.7, 137.7, 136.3, 135.9, 132.9, 128.4, 128.1, 128.0, 127.6, 127.5, 127.4, 125.6, 105.1, 66.2, 52.6, 37.8.

HRMS (ESI):  $m/z$  calculated for  $\text{C}_{20}\text{H}_{18}\text{NO}_5^+$   $[\text{M}+\text{H}]^+$ , 352.1179; found, 352.1176.

**benzyl 2-(6-chloro-1-oxo-1,2-dihydroisoquinolin-3-yl)acetate (3fa)**

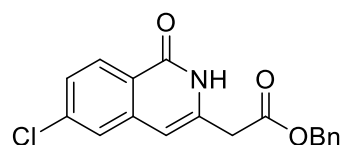

Prepared from 3f (0.2 mmol, 1.0 equiv) and 2a (0.24 mmol, 1.2 equiv) according to the general procedure 4, Purification by flash column (EtOAc/Petroleum Ether = 1/3) afforded **3fa** (59 mg, 90% yield) as solid.

Rf = 0.35 (EtOAc/Petroleum Ether = 1/2)

<sup>1</sup>H NMR (500 MHz, DMSO-*d*<sub>6</sub>) δ 11.51 (s, 1H), 8.13 (d, *J* = 8.6 Hz, 1H), 7.71 (s, 1H), 7.49 – 7.42 (m, 1H), 7.42 – 7.30 (m, 5H), 6.46 (s, 1H), 5.15 (s, 2H), 3.73 (s, 2H).

<sup>13</sup>C NMR (126 MHz, DMSO-*d*<sub>6</sub>) δ 169.1, 161.7, 139.3, 137.5, 136.8, 135.9, 128.9, 128.5, 128.1, 128.0, 126.4, 125.1, 123.3, 104.1, 66.1, 37.8.

HRMS (ESI): *m/z* calculated for C<sub>18</sub>H<sub>15</sub>ClNO<sub>3</sub><sup>+</sup> [M+H]<sup>+</sup>, 328.0735; found, 328.0744.

### benzyl 2-(6-bromo-1-oxo-1,2-dihydroisoquinolin-3-yl)acetate (**3ga**)

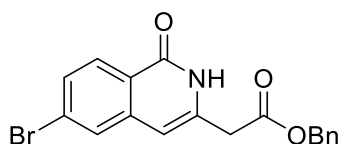

Prepared from 1g (0.2 mmol, 1.0 equiv) and 2a (0.24mmol, 1.2 equiv) according to the general procedure 4, Purification by flash column (EtOAc/Petroleum Ether = 1/3) afforded **3ga** (68 mg, 91% yield) as solid.

Rf = 0.38 (EtOAc/Petroleum Ether = 1/2)

H NMR (500 MHz, DMSO-*d*<sub>6</sub>) δ 11.52 (s, 1H), 8.05 (d, *J* = 8.4 Hz, 1H), 7.87 (s, 1H), 7.60 (d, *J* = 8.5 Hz, 1H), 7.42-7.34 (m, 5H), 6.45 (s, 1H), 5.15 (s, 2H), 3.73 (s, 2H).

<sup>13</sup>C NMR (126 MHz, DMSO-*d*<sub>6</sub>) δ 169.1, 161.8, 139.5, 136.8, 135.9, 129.1, 128.9, 128.5, 128.2, 128.1, 128.0, 126.6, 123.6, 104.0, 66.2, 37.8.

HRMS (ESI): *m/z* calculated for C<sub>18</sub>H<sub>15</sub>BrNO<sub>3</sub><sup>+</sup> [M+H]<sup>+</sup>, 372.0230; found, 372.0238.

### benzyl 2-(6-iodo-1-oxo-1,2-dihydroisoquinolin-3-yl)acetate (**3ha**)

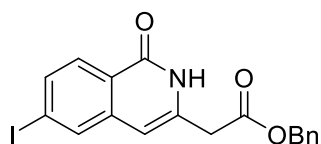

Prepared from 1h (0.2 mmol, 1.0 equiv) and 2a (0.24 mmol, 1.2 equiv) according to the general procedure 4, Purification by flash column (EtOAc/Petroleum Ether = 1/3) afforded **3ha** (65 mg, 78% yield) as solid.

Rf = 0.34 (EtOAc/Petroleum Ether = 1/2)

<sup>1</sup>H NMR (300 MHz, DMSO-*d*<sub>6</sub>) δ 11.47 (s, 1H), 8.05 (s, 1H), 7.87 (d, *J* = 8.3 Hz, 1H), 7.76 (d, *J* = 8.6 Hz, 1H), 7.43-7.31 (m, 5H), 6.41 (s, 1H), 5.15 (s, 2H), 3.72 (s, 2H).

<sup>13</sup>C NMR (75 MHz, CDCl<sub>3</sub>) δ 168.8, 163.9, 139.5, 135.8, 135.2, 134.9, 134.7, 129.0, 128.8, 128.7, 128.5, 124.1, 105.3, 100.9, 67.6, 38.7.

HRMS (ESI): *m/z* calculated for C<sub>18</sub>H<sub>14</sub>INaNO<sub>3</sub><sup>+</sup> [M+Na]<sup>+</sup>, 441.9911; found, 441.9911.

#### benzyl 2-(1-oxo-6-phenyl-1,2-dihydroisoquinolin-3-yl)acetate (**3ia**)

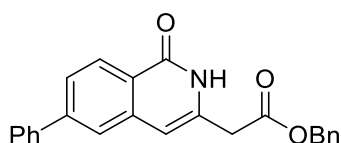

Prepared from 1i (0.2 mmol, 1.0 equiv) and 2a (0.24 mmol, 1.2 equiv) according to the general procedure 4, Purification by flash column (EtOAc/Petroleum Ether = 1/3) afforded **3ia** (40 mg, 54% yield) as solid.

Rf = 0.32 (EtOAc/Petroleum Ether = 1/2)

<sup>1</sup>H NMR (300 MHz, CDCl<sub>3</sub>) δ 10.92 (s, 1H), 8.42 (d, *J* = 8.3 Hz, 1H), 7.70-7.65 (m, 4H), 7.51-7.41 (m, 4H), 7.37-7.31 (m, 4H), 6.49 (s, 1H), 5.20 (s, 2H), 3.73 (s, 2H).

<sup>13</sup>C NMR (126 MHz, DMSO-*d*<sub>6</sub>) δ 170.4, 147.3, 138.0, 136.0, 131.1, 130.9, 128.4, 128.3, 128.2, 128.1, 128.0, 128.0, 126.4, 121.9, 119.0, 116.7, 103.8, 95.7, 66.0, 33.5.

HRMS (ESI): *m/z* calculated for C<sub>24</sub>H<sub>20</sub>NO<sub>3</sub><sup>+</sup> [M+H]<sup>+</sup>, 370.1438; found, 370.1447.

#### benzyl 2-(1-oxo-6-vinyl-1,2-dihydroisoquinolin-3-yl)acetate (**3ja**)

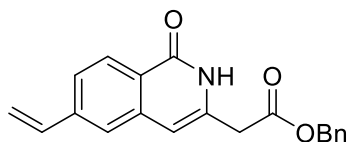

Prepared from 1j (0.2 mmol, 1.0 equiv) and 2a (0.24 mmol, 1.2 equiv) according to the general procedure 4, Purification by flash column (EtOAc/Petroleum Ether = 1/3) afforded **3ja** (36 mg, 57% yield) as solid.

R<sub>f</sub> = 0.37 (EtOAc/Petroleum Ether = 1/2)

<sup>1</sup>H NMR (300 MHz, DMSO-*d*<sub>6</sub>) δ 11.36 (s, 1H), 8.11 (d, *J* = 8.2 Hz, 1H), 7.62 (d, *J* = 8.9 Hz, 2H), 7.40-7.34 (m, 5H), 6.85 (dd, *J* = 17.6, 10.8 Hz, 1H), 6.45 (s, 1H), 6.03 (d, *J* = 17.6 Hz, 1H), 5.44 (d, *J* = 11.0 Hz, 1H), 5.16 (s, 2H), 3.73 (s, 2H).

<sup>13</sup>C NMR (75 MHz, DMSO-*d*<sub>6</sub>) δ 169.3, 162.0, 140.9, 138.2, 136.1, 135.9, 135.5, 128.5, 128.1, 128.0, 127.0, 124.1, 123.9, 123.5, 117.2, 105.0, 66.1, 37.7.

HRMS (ESI): *m/z* calculated for C<sub>20</sub>H<sub>18</sub>NO<sub>3</sub><sup>+</sup> [M+H]<sup>+</sup>, 320.1281; found, 320.1287.

#### benzyl 2-(7-methyl-1-oxo-1,2-dihydroisoquinolin-3-yl)acetate (**3ka**)

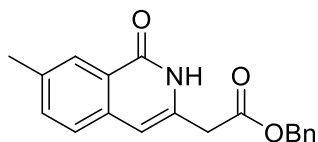

Prepared from 1k (0.2 mmol, 1.0 equiv) and 2a (0.24 mmol, 1.2 equiv) according to the general procedure 4, Purification by flash column (EtOAc/Petroleum Ether = 1/3) afforded **3ka** (37mg, 60% yield) as solid.

R<sub>f</sub> = 0.39 (EtOAc/Petroleum Ether = 1/2)

<sup>1</sup>H NMR (300 MHz, CDCl<sub>3</sub>) δ 10.85 (s, 1H), 8.16 (s, 1H), 7.46 (d, *J* = 8.3 Hz, 1H), 7.40-7.36 (m, 1H), 7.35-7.29 (m, 5H), 6.38 (s, 1H), 5.18 (s, 2H), 3.69 (s, 2H), 2.46 (s, 3H).

<sup>13</sup>C NMR (126 MHz, DMSO-*d*<sub>6</sub>) δ 169.4, 162.2, 135.9, 135.6, 135.5, 134.0, 133.8, 128.4, 128.1, 129.0, 126.1, 126.0, 124.8, 104.9, 66.1, 37.7, 21.0.

HRMS (ESI):  $m/z$  calculated for  $C_{19}H_{18}NO_3^+$   $[M+H]^+$ , 308.1281; found, 308.1285.

**benzyl 2-(7-chloro-1-oxo-1,2-dihydroisoquinolin-3-yl)acetate (3la)**

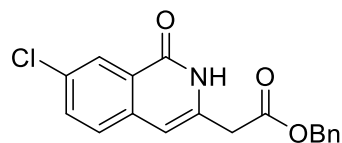

Prepared from 11 (0.2 mmol, 1.0 equiv) and 2a (0.24 mmol, 1.2 equiv) according to the general procedure 4, Purification by flash column (EtOAc/Petroleum Ether = 1/3) afforded **3la** (42 mg, 63% yield) as solid.

R<sub>f</sub> = 0.39 (EtOAc/Petroleum Ether = 1/2)

<sup>1</sup>H NMR (400 MHz, CDCl<sub>3</sub>) δ 11.03 (s, 1H), 8.29 – 8.24 (m, 1H), 7.69 (dd,  $J = 7.7$ , 1.3 Hz, 1H), 7.38 – 7.30 (m, 6H), 6.79 (s, 1H), 5.20 (s, 2H), 3.75 (s, 2H).

<sup>13</sup>C NMR (75 MHz, DMSO-*d*<sub>6</sub>) δ 169.2, 161.6, 137.1, 135.9, 135.3, 132.8, 129.1, 128.5, 128.1, 128.0, 126.7, 126.4, 126.0, 100.7, 66.2, 37.9.

HRMS (ESI):  $m/z$  calculated for  $C_{18}H_{14}ClNaNO_3^+$   $[M+Na]^+$ , 350.0554; found, 350.0564.

**benzyl 2-(7-bromo-1-oxo-1,2-dihydroisoquinolin-3-yl)acetate (3ma)**

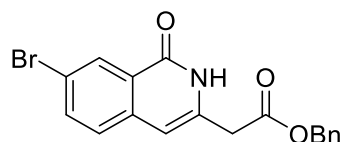

Prepared from 1m (0.2 mmol, 1.0 equiv) and 2a (0.24 mmol, 1.2 equiv) according to the general procedure 4, Purification by flash column (EtOAc/Petroleum Ether = 1/3) afforded **3ma** (51 mg, 69% yield) as solid.

R<sub>f</sub> = 0.39 (EtOAc/Petroleum Ether = 1/2)

<sup>1</sup>H NMR (500 MHz, DMSO-*d*<sub>6</sub>) δ 11.67 (s, 1H), 8.18 (d,  $J = 8.1$  Hz, 1H), 8.00 (d,  $J = 7.8$  Hz, 1H), 7.44 - 7.30 (m, 6H), 6.67 (s, 1H), 5.16 (s, 2H), 3.83 (s, 2H).

$^{13}\text{C}$  NMR (126 MHz,  $\text{DMSO-}d_6$ )  $\delta$  169.1, 161.6, 137.2, 136.7, 136.3, 135.9, 128.4, 128.1, 128.0, 127.1, 126.7, 126.5, 119.8, 103.2, 66.1, 37.9.

HRMS (ESI):  $m/z$  calculated for  $\text{C}_{18}\text{H}_{14}\text{BrNaNO}_3^+$   $[\text{M}+\text{Na}]^+$ , 394.0049; found, 394.0047.

**benzyl 2-(5,7-dimethyl-1-oxo-1,2-dihydroisoquinolin-3-yl)acetate (3na)**

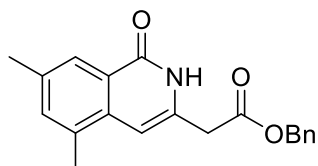

Prepared from 1n (0.2 mmol, 1.0 equiv) and 2a (0.24 mmol, 1.2 equiv) according to the general procedure 4, Purification by flash column (EtOAc/Petroleum Ether = 1/3) afforded **3na** (32 mg, 50% yield) as solid.

$R_f$  = 0.34 (EtOAc/Petroleum Ether = 1/2)

$^1\text{H}$  NMR (400 MHz,  $\text{CDCl}_3$ )  $\delta$  10.26 (s, 1H), 8.04 (s, 1H), 7.36 - 7.30 (m, 6H), 6.46 (s, 1H), 5.19 (s, 2H), 3.69 (s, 2H), 2.46 (s, 3H), 2.42 (s, 3H).

$^{13}\text{C}$  NMR (75 MHz,  $\text{DMSO-}d_6$ )  $\delta$  169.4, 162.4, 136.0, 135.0, 134.5, 134.3, 133.7, 132.9, 128.4, 128.1, 128.0, 125.0, 124.1, 101.8, 66.0, 37.9, 21.0, 18.6.

HRMS (ESI):  $m/z$  calculated for  $\text{C}_{20}\text{H}_{20}\text{NO}_3^+$   $[\text{M}+\text{H}]^+$ , 322.1438; found, 322.1445

**benzyl 2-(5,7-dichloro-1-oxo-1,2-dihydroisoquinolin-3-yl)acetate (3oa)**

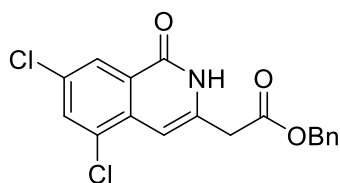

Prepared from 1o (0.2 mmol, 1.0 equiv) and 2a (0.24 mmol, 1.2 equiv) according to the general procedure 4, Purification by flash column (EtOAc/Petroleum Ether = 1/3) afforded **3oa** (60 mg, 83% yield) as solid.

$R_f$  = 0.34 (EtOAc/Petroleum Ether = 1/2)

$^1\text{H}$  NMR (500 MHz,  $\text{DMSO-}d_6$ )  $\delta$  11.85 (s, 1H), 8.07 (s, 1H), 7.99 (s, 1H), 7.42 -7.31 (m, 5H), 6.69 (s, 1H), 5.16 (s, 2H), 3.83 (s, 2H).

$^{13}\text{C}$  NMR (126 MHz,  $\text{DMSO-}d_6$ )  $\delta$  169.0, 160.6, 137.7, 135.9, 134.2, 132.4, 130.5, 130.4, 128.4, 128.1, 128.0, 127.0, 125.2, 100.4, 66.2, 37.9.

HRMS (ESI):  $m/z$  calculated for  $\text{C}_{18}\text{H}_{14}\text{Cl}_2\text{NO}_3^+$   $[\text{M}+\text{H}]^+$ , 362.0345; found, 362.0347.

### benzyl 2-(5,7-dibromo-1-oxo-1,2-dihydroisoquinolin-3-yl)acetate (**3pa**)

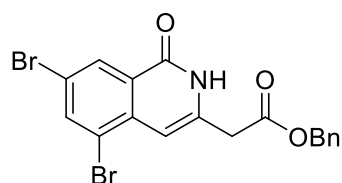

Prepared from 1p (0.2 mmol, 1.0 equiv) and 2a (0.24 mmol, 1.2 equiv) according to the general procedure 4, Purification by flash column (EtOAc/Petroleum Ether = 1/3) afforded **3pa** (60 mg, 67% yield) as solid.

$R_f$  = 0.39 (EtOAc/Petroleum Ether = 1/2)

$^1\text{H}$  NMR (500 MHz,  $\text{DMSO-}d_6$ )  $\delta$  11.85 (s, 1H), 8.25 (s, 1H), 8.22 (s, 1H), 7.45 - 7.30 (s, 5H), 6.65 (s, 1H), 5.16 (s, 2H), 3.83 (s, 2H)

$^{13}\text{C}$  NMR (126 MHz,  $\text{DMSO-}d_6$ )  $\delta$  169.0, 160.5, 138.0, 137.9, 135.9, 129.5, 128.9, 128.5, 128.1, 128.0, 127.3, 121.0, 118.6, 103.0, 66.2, 37.9.

HRMS (ESI):  $m/z$  calculated for  $\text{C}_{18}\text{H}_{13}\text{Br}_2\text{NaNO}_3^+$   $[\text{M}+\text{Na}]^+$ , 471.9154; found, 471.9153.

### benzyl 2-(7-oxo-6,7-dihydrothieno[2,3-c]pyridin-5-yl)acetate (**3qa**)

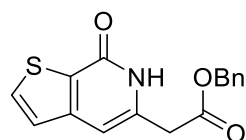

Prepared from 1q (0.2 mmol, 1.0 equiv) and 2a (0.24mmol, 1.2 equiv) according to the general procedure 4, Purification by flash column (EtOAc/Petroleum Ether = 1/3)

afforded **3qa** (35mg, 58% yield) as solid.

R<sub>f</sub> = 0.43(EtOAc/Petroleum Ether = 1/1)

<sup>1</sup>H NMR (300 MHz, CDCl<sub>3</sub>) δ 12.74 (s, 1H), 7.72 (d, *J* = 5.3 Hz, 1H), 7.37 – 7.23 (m, 7H), 5.13 (s, 2H), 3.70 (s, 2H).

<sup>13</sup>C NMR (75 MHz, CDCl<sub>3</sub>) δ 170.7, 160.9, 146.9, 135.5, 133.9, 129.6, 129.1, 128.7, 128.5, 128.4, 123.2, 109.7, 67.1, 36.2

HRMS (ESI): *m/z* calculated for C<sub>16</sub>H<sub>14</sub>NO<sub>3</sub>S<sup>+</sup> [M+H]<sup>+</sup>, 300.0689; found, 300.0691

**benzyl 2-(6-(N,N-dipropylsulfamoyl)-1-oxo-1,2-dihydroisoquinolin-3-yl)acetate (3ra)**

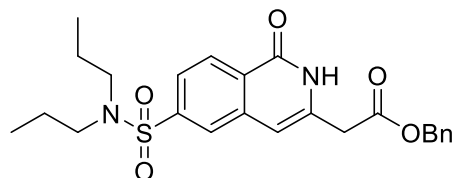

Prepared from 1r (0.2 mmol, 1.0 equiv) and 2a (0.24 mmol, 1.2 equiv) according to the general procedure 4, Purification by flash column (EtOAc/Petroleum Ether = 1/3)

afforded **3ra** (36 mg, 40% yield) as oil.

R<sub>f</sub> = 0.33 (EtOAc/Petroleum Ether = 1/2)

<sup>1</sup>H NMR (300 MHz, DMSO-*d*<sub>6</sub>) δ 11.68 (s, 1H), 8.31 (d, *J* = 8.4 Hz, 1H), 8.07 (s, 1H), 7.77 (d, *J* = 8.5 Hz, 1H), 7.41 – 7.34 (m, 5H), 6.67 (s, 1H), 5.16 (s, 2H), 3.76 (s, 2H), 3.07 (t, *J* = 7.6 Hz, 4H), 1.47 (q, *J* = 7.5 Hz, 4H), 0.80 (t, *J* = 7.4 Hz, 6H).

<sup>13</sup>C NMR (75 MHz, DMSO-*d*<sub>6</sub>) δ 169.1, 161.5, 143.0, 138.1, 137.0, 135.9, 128.5, 128.3, 128.2, 128.1, 126.9, 124.8, 123.3, 105.0, 66.2, 49.7, 37.8, 21.7, 11.0.

HRMS (ESI): *m/z* calculated for C<sub>24</sub>H<sub>29</sub>N<sub>2</sub>O<sub>5</sub>S<sup>+</sup> [M+H]<sup>+</sup>, 457.1792; found, 457.1794

**ethyl 2-(1-oxo-1,2-dihydroisoquinolin-3-yl)acetate (3ab)**



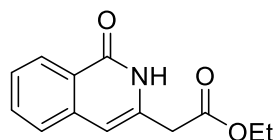

Prepared from 1 (0.2 mmol, 1.0 equiv) and 2b (0.24 mmol, 1.2 equiv) according to the general procedure 4, Purification by flash column (EtOAc/Petroleum Ether = 1/3) afforded **3ab** (33 mg, 72% yield) as solid.

R<sub>f</sub> = 0.4 (EtOAc/Petroleum Ether = 1/2).

<sup>1</sup>H NMR (500 MHz, DMSO-*d*<sub>6</sub>) δ 11.30 (s, 1H), 8.15 (d, *J* = 8.0 Hz, 1H), 7.67 (t, *J* = 7.5 Hz, 1H), 7.58 (d, *J* = 7.9 Hz, 1H), 7.45 (t, *J* = 7.5 Hz, 1H), 6.45 (s, 1H), 4.12 (q, *J* = 7.1 Hz, 2H), 3.64 (s, 2H), 1.21 (t, *J* = 7.1 Hz, 3H).

<sup>13</sup>C NMR (126 MHz, DMSO-*d*<sub>6</sub>) δ 169.3, 162.2, 137.8, 135.2, 132.5, 126.6, 126.1, 126.0, 124.8, 104.9, 60.6, 37.8, 14.1.

HRMS (ESI): *m/z* calculated for C<sub>13</sub>H<sub>14</sub>NO<sub>3</sub><sup>+</sup> [M+H]<sup>+</sup>, 232.0968; found, 232.0978

#### benzyl 2-(4-methyl-1-oxo-1,2-dihydroisoquinolin-3-yl)acetate (**3ac**)

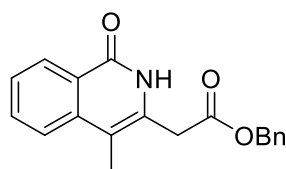

Prepared from 1 (0.2 mmol, 1.0 equiv) and 2c (0.24 mmol, 1.2 equiv) according to the general procedure 4, Purification by flash column (EtOAc/Petroleum Ether = 1/3) afforded **3ac** (47 mg, 76% yield) as solid.

R<sub>f</sub> = 0.4 (EtOAc/Petroleum Ether = 1/2)

<sup>1</sup>H NMR (400 MHz, CDCl<sub>3</sub>) δ 10.45 (s, 1H), 8.43 (d, *J* = 8.0 Hz, 1H), 7.70 (q, *J* = 9.1, 8.6 Hz, 2H), 7.50 (d, *J* = 6.5 Hz, 1H), 7.34 – 7.28 (m, 5H), 5.16 (s, 2H), 3.78 (s, 2H), 2.26 (s, 3H).

<sup>13</sup>C NMR (75 MHz, DMSO-*d*<sub>6</sub>) δ 169.2, 161.5, 138.2, 136.0, 132.5, 131.1, 128.4, 128.1, 127.9, 126.8, 126.0, 125.2, 123.4, 108.8, 66.1, 35.9, 12.2.

HRMS (ESI):  $m/z$  calculated for  $C_{19}H_{18}NO_3^+$   $[M+H]^+$ , 308.1281; found, 308.1284

**benzyl 2-(1-oxo-1,2-dihydroisoquinolin-3-yl)propanoate (3ad)**

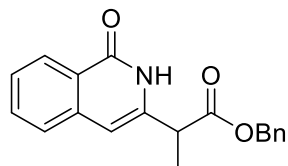

Prepared from 1 (0.2 mmol, 1.0 equiv) and 2d (0.24 mmol, 1.2 equiv) according to the general procedure 4, Purification by flash column (EtOAc/Petroleum Ether = 1/3)

afforded **3ad** (48 mg, 79% yield) as solid.

$R_f$  = 0.38 (EtOAc/Petroleum Ether = 1/2)

$^1H$  NMR (300 MHz,  $CDCl_3$ )  $\delta$  10.43 (s, 1H), 8.36 (d,  $J$  = 8.0 Hz, 1H), 7.63 (t,  $J$  = 7.6 Hz, 1H), 7.50 – 7.41 (d, 2H), 7.32 - 7.24 (m, 5H), 6.38 (s, 1H), 5.23 – 5.10 (m, 2H), 3.77 (q,  $J$  = 7.2 Hz, 1H), 1.62 (d,  $J$  = 7.2 Hz, 3H).

$^{13}C$  NMR (75 MHz,  $CDCl_3$ )  $\delta$  172.2, 164.0, 138.9, 138.1, 135.4, 132.8, 128.7, 128.5, 128.3, 127.6, 126.7, 126.3, 125.3, 104.5, 67.4, 43.5, 17.0.

HRMS (ESI):  $m/z$  calculated for  $C_{19}H_{17}NaNO_3^+$   $[M+Na]^+$ , 330.1101; found, 330.1103

**(2,2,7,7-tetramethyltetrahydro-5H-bis([1,3]dioxolo)[4,5-b:4',5'-d]pyran-5-yl)methyl 2-(1-oxo-1,2-dihydroisoquinolin-3-yl)acetate (3ae)**

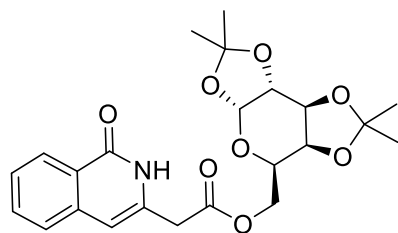

Prepared from 1 (0.2 mmol, 1.0 equiv) and 2i (0.24 mmol, 1.2 equiv) according to the general procedure 4, Purification by flash column (EtOAc/Petroleum Ether = 1/3)

afforded **3ae** (46 mg, 52% yield) as oil.

$R_f$  = 0.38 (EtOAc/Petroleum Ether = 1/1)

$^1\text{H}$  NMR (300 MHz,  $\text{DMSO-}d_6$ )  $\delta$  11.31 (s, 1H), 8.14 (d,  $J = 8.0$  Hz, 1H), 7.67 (t,  $J = 7.7$  Hz, 1H), 7.57 (d,  $J = 7.9$  Hz, 1H), 7.46 (t,  $J = 7.5$  Hz, 1H), 6.45 (s, 1H), 5.46 (d,  $J = 5.0$  Hz, 1H), 4.61 (d,  $J = 7.9$  Hz, 1H), 4.37 (s, 1H), 4.26 (d,  $J = 8.9$  Hz, 1H), 4.14 (d,  $J = 6.1$  Hz, 2H), 3.95 (d,  $J = 6.3$  Hz, 1H), 3.68 (s, 2H), 1.35 (s, 6H), 1.27 (s, 6H).

$^{13}\text{C}$  NMR (75 MHz,  $\text{DMSO-}d_6$ )  $\delta$  169.4, 162.3, 137.8, 135.0, 132.4, 126.6, 126.1, 126.0, 124.8, 108.7, 108.0, 104.9, 95.6, 70.2, 70.0, 69.7, 65.3, 63.7, 37.7, 25.9, 25.7, 24.9, 24.3.

HRMS (ESI):  $m/z$  calculated for  $\text{C}_{23}\text{H}_{28}\text{NO}_8^+$   $[\text{M}+\text{H}]^+$ , 446.1809; found, 446.1815

**methyl 2-((tert-butoxycarbonyl)amino)-3-(4-(2-(1-oxo-1,2-dihydroisoquinolin-3-yl)acetoxy)phenyl)propanoate (3af)**

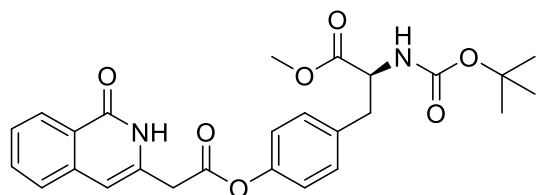

Prepared from 1 (0.2 mmol, 1.0 equiv) and 2f (0.24 mmol, 1.2 equiv) according to the general procedure 4, Purification by flash column (EtOAc/Petroleum Ether = 1/3) afforded **3af** (53 mg, 55% yield) as oil.

$R_f = 0.38$  (EtOAc/Petroleum Ether = 1/1)

$^1\text{H}$  NMR (300 MHz,  $\text{DMSO-}d_6$ )  $\delta$  11.46 (s, 1H), 8.16 (d,  $J = 8.0$  Hz, 1H), 7.69 (t,  $J = 7.5$  Hz, 1H), 7.61 (d,  $J = 8.0$  Hz, 1H), 7.47 (t,  $J = 7.5$  Hz, 1H), 7.35 (d,  $J = 8.0$  Hz, 1H), 7.28 (d,  $J = 8.4$  Hz, 2H), 7.09 (d,  $J = 8.0$  Hz, 1H), 7.00 (d,  $J = 8.0$  Hz, 1H), 6.65 (d,  $J = 8.0$  Hz, 1H), 6.55 (s, 1H), 3.94 (s, 2H), 3.60 (s, 3H), 3.00 (dd,  $J = 14.5, 5.0$  Hz, 1H), 2.83 (d,  $J = 12.2$  Hz, 1H), 1.31 (s, 9H).

$^{13}\text{C}$  NMR (126 MHz,  $\text{DMSO-}d_6$ )  $\delta$  172.6, 168.3, 162.3, 155.4, 149.1, 137.7, 135.3, 134.7, 132.5, 130.2, 128.2, 127.5, 126.6, 126.3, 126.1, 124.9, 121.4, 105.3, 78.3, 55.1, 51.8, 37.8, 35.8, 28.1.

HRMS (ESI):  $m/z$  calculated for  $C_{26}H_{28}NaN_2O_7^+$   $[M+Na]^+$ , 503.1789; found, 503.1794

**(8R,9S,13S,14S)-13-methyl-17-oxo-7,8,9,11,12,13,14,15,16,17-decahydro-6H-cyclopenta[a]phenanthren-3-yl 2-(1-oxo-1,2-dihydroisoquinolin-3-yl)acetate (3ag)**

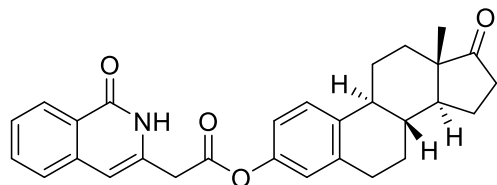

Prepared from **1** (0.2 mmol, 1.0 equiv) and **2g** (0.24 mmol, 1.2 equiv) according to the general procedure 4, Purification by flash column (EtOAc/Petroleum Ether = 1/3) afforded **3ag** (29 mg, 32% yield) as solid.

R<sub>f</sub> = 0.38 (EtOAc/Petroleum Ether = 1/3)

<sup>1</sup>H NMR (300 MHz, CDCl<sub>3</sub>) δ 11.06 (s, 1H), 8.44 (d,  $J$  = 8.0 Hz, 1H), 7.70 (t,  $J$  = 7.6 Hz, 1H), 7.59 – 7.48 (m, 2H), 7.30 (s, 1H), 6.92 (d,  $J$  = 8.7 Hz, 1H), 6.87 (s, 1H), 6.56 (s, 1H), 3.93 (s, 2H), 2.85 (q,  $J$  = 4.8, 3.8 Hz, 2H), 2.60 – 2.48 (m, 1H), 2.45 - 2.36 (m, 1H), 2.32 - 2.25 (m, 1H), 2.22 – 2.14 (m, 1H), 2.06 – 1.98 (m, 2H), 1.66 – 1.46 (m, 6H), 1.39 – 1.33 (m, 1H), 0.93 (s, 3H).

<sup>13</sup>C NMR (75 MHz, CDCl<sub>3</sub>) δ 167.9, 164.2, 148.5, 138.3, 138.1, 138.0, 133.0, 127.7, 127.0, 126.6, 126.2, 125.23, 124.3, 121.5, 118.6, 106.9, 50.6, 48.1, 44.3, 39.0, 38.1, 36.0, 31.7, 29.8, 29.5, 26.4, 25.9, 21.7, 14.0.

HRMS (ESI):  $m/z$  calculated for  $C_{29}H_{30}NO_4^+$   $[M+H]^+$ , 456.2169; found, 456.2168

**(4S,5'R,6aR,6bS,8aS,8bR,9S,10R,11aS,12aS,12bS)-5',6a,8a,9-tetramethyl-1,3,3',4,4',5,5',6,6a,6b,6',7,8,8a,8b,9,11a,12,12a,12b-icosahydrospiro[naphtho[2',1':4,5]indeno[2,1-b]furan-10,2'-pyran]-4-yl 2-(1-oxo-1,2-dihydroisoquinolin-3-yl)acetate(3ah)**

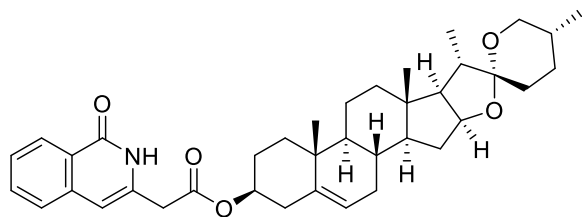

Prepared from **1** (0.2 mmol, 1.0 equiv) and **2h** (0.24 mmol, 1.2 equiv) according to the general procedure 4, Purification by flash column (EtOAc/Petroleum Ether = 1/3) afforded **3ah** (47 mg, 39% yield) as solid.

R<sub>f</sub> = 0.38 (EtOAc/Petroleum Ether = 1/3)

<sup>1</sup>H NMR (300 MHz, CDCl<sub>3</sub>) δ 9.93 (s, 1H), 8.42 (d, *J* = 8.0 Hz, 1H), 7.69 (t, *J* = 7.5 Hz, 1H), 7.53 (d, *J* = 9.0 Hz, 2H), 6.43 (s, 1H), 5.39 (d, *J* = 5.0 Hz, 1H), 4.72 (d, *J* = 10.2 Hz, 1H), 4.45 (q, *J* = 7.4 Hz, 1H), 3.63 (s, 2H), 3.54 – 3.38 (m, 2H), 2.38 (d, *J* = 8.3 Hz, 2H), 2.07 – 2.03 (m, 1H), 2.03 – 1.99 (m, 1H), 1.93 – 1.88 (m, 2H), 1.86 – 1.83 (m, 1H), 1.82 – 1.77 (s, 2H), 1.75 – 1.68 (m, 5H), 1.55 – 1.50 (m, 2H), 1.49 – 1.45 (m, 1H), 1.44 – 1.40 (m, 1H), 1.39 – 1.34 (m, 1H), 1.33 – 1.28 (m, 3H), 1.22 – 1.18 (m, 1H), 1.17 – 1.12 (m, 2H), 1.06 (s, 3H), 1.01 (d, *J* = 6.8 Hz, 3H), 0.84 (3, 3H), 0.82 (3, 3H).

<sup>13</sup>C NMR (126 MHz, CDCl<sub>3</sub>) δ 168.5, 163.5, 139.4, 138.0, 133.2, 132.9, 127.7, 126.8, 126.1, 125.3, 122.9, 109.4, 106.3, 80.9, 75.7, 67.0, 62.2, 56.6, 50.0, 41.8, 40.4, 39.8, 39.2, 38.1, 37.0, 36.8, 32.2, 32.0, 31.5, 31.5, 30.4, 29.0, 27.8, 21.0, 19.5, 17.3, 16.4, 14.7.

HRMS (ESI): *m/z* calculated for C<sub>38</sub>H<sub>54</sub>NO<sub>3</sub><sup>+</sup> [M+H]<sup>+</sup>, 572.4098; found, 572.4107

#### benzyl 2-(1-oxo-1,2-dihydropyrimido[1,6-a]indol-3-yl)acetate (**5aa**)

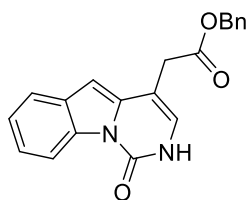

Prepared from 4a (0.2 mmol, 1.0 equiv) and 2a (0.3 mmol, 1.5 equiv) according to the general procedure 5, Purification by flash column (EtOAc/Petroleum Ether = 1/3) afforded **5aa** (58mg, 87% yield) as solid.

R<sub>f</sub> = 0.38 (EtOAc/Petroleum Ether = 1/2)

<sup>1</sup>H NMR (300 MHz, CDCl<sub>3</sub>) δ 8.87 (s, 1H), 8.69 – 8.61 (m, 1H), 7.67 – 7.61 (m, 1H), 7.40 – 7.32 (m, 6H), 7.26 (s, 1H), 6.75 (d, *J* = 5.3 Hz, 1H), 6.53 (s, 1H), 5.18 (s, 2H), 3.59 (s, 2H).

<sup>13</sup>C NMR (126 MHz, CDCl<sub>3</sub>) δ 170.5, 147.6, 136.5, 136.0, 132.4, 129.7, 128.4, 128.1, 128.0, 125.5, 123.5, 122.0, 119.7, 115.3, 103.9, 96.2, 66.0, 33.6.

HRMS (ESI): *m/z* calculated for C<sub>20</sub>H<sub>17</sub>N<sub>2</sub>O<sub>3</sub><sup>+</sup> [M+H]<sup>+</sup>, 333.1234; found, 333.1237.

#### benzyl 2-(6-methoxy-1-oxo-1,2-dihydropyrimido[1,6-a]indol-4-yl)acetate (**5ba**)

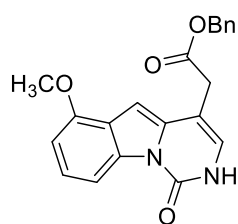

Prepared from 4b (0.2 mmol, 1.0 equiv) and 2a (0.3 mmol, 1.5 equiv) according to the general procedure 5, Purification by flash column (EtOAc/Petroleum Ether = 1/3) afforded **5ba** (43 mg, 59% yield) as solid.

R<sub>f</sub> = 0.37 (EtOAc/Petroleum Ether = 1/2)

<sup>1</sup>H NMR (400 MHz, DMSO-*d*<sub>6</sub>) δ 10.84 (d, *J* = 4.0 Hz, 1H), 8.12 (d, *J* = 8.3 Hz, 1H), 7.37 – 7.31 (m, 5H), 7.23 (t, *J* = 8.1 Hz, 1H), 6.92 (d, *J* = 4.0 Hz, 1H), 6.87 (d, *J* = 7.9 Hz, 1H), 6.55 (s, 1H), 5.14 (s, 2H), 3.92 (s, 3H), 3.72 (s, 2H).

<sup>13</sup>C NMR (75 MHz, DMSO-*d*<sub>6</sub>) δ 170.4, 151.8, 147.6, 136.0, 135.2, 133.4, 128.3, 128.0, 127.8, 124.9, 123.1, 120.2, 108.4, 104.1, 103.7, 93.4, 65.9, 55.2, 33.6.

HRMS (ESI): *m/z* calculated for C<sub>21</sub>H<sub>18</sub>NaN<sub>2</sub>O<sub>4</sub><sup>+</sup> [M+Na]<sup>+</sup>, 385.1159; found, 385.1162

**benzyl 2-(6-chloro-1-oxo-1,2-dihydropyrimido[1,6-a]indol-4-yl)acetate (5ca)**

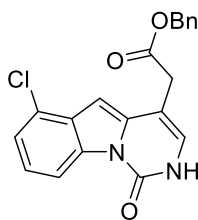

Prepared from 4c (0.2 mmol, 1.0 equiv) and 2a (0.3 mmol, 1.5 equiv) according to the general procedure 5, Purification by flash column (EtOAc/Petroleum Ether = 1/3) afforded **5ca** (45mg, 61% yield) as solid.

R<sub>f</sub> = 0.33 (EtOAc/Petroleum Ether = 1/2)

<sup>1</sup>H NMR (300 MHz, DMSO-*d*<sub>6</sub>) δ 11.13 (s, 1H), 8.50 (d, *J* = 8.2 Hz, 1H), 7.45 (d, *J* = 7.7 Hz, 1H), 7.40 – 7.27 (m, 6H), 7.07 (s, 1H), 6.60 (s, 1H), 5.16 (s, 2H), 3.80 (s, 2H).

<sup>13</sup>C NMR (75 MHz, DMSO-*d*<sub>6</sub>) δ 170.4, 147.3, 137.6, 136.0, 133.1, 128.4, 128.0, 127.9, 126.6, 123.5, 123.1, 122.9, 114.3, 103.9, 94.0, 66.0, 33.5.

HRMS (ESI): *m/z* calculated for C<sub>20</sub>H<sub>16</sub>ClN<sub>2</sub>O<sub>3</sub><sup>+</sup> [M+H]<sup>+</sup>, 367.0844; found, 367.0847.

**benzyl 2-(7-(benzyloxy)-1-oxo-1,2-dihydropyrimido[1,6-a]indol-4-yl)acetate (5da)**

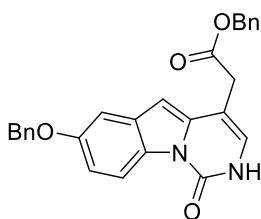

Prepared from 4d (0.2 mmol, 1.0 equiv) and 2a (0.3 mmol, 1.5 equiv) according to the general procedure 5, Purification by flash column (EtOAc/Petroleum Ether = 1/3) afforded **5da** (55 mg, 63% yield) as solid.

R<sub>f</sub> = 0.38 (EtOAc/Petroleum Ether = 1/2)

<sup>1</sup>H NMR (300 MHz, DMSO-*d*<sub>6</sub>) δ 10.85 (d, *J* = 5.2 Hz, 1H), 8.40 (d, *J* = 9.0 Hz, 1H), 7.49 (d, *J* = 6.8 Hz, 2H), 7.40 (t, *J* = 7.1 Hz, 2H), 7.36 – 7.30 (m, 6H), 7.22 (d, *J* = 2.5 Hz, 1H), 7.03 – 6.92 (m, 2H), 6.42 (s, 1H), 5.15 (d, *J* = 7.0 Hz, 4H), 3.71 (s, 2H).

$^{13}\text{C}$  NMR (75 MHz, DMSO)  $\delta$  170.4, 155.2, 147.3, 137.3, 137.1, 136.0, 130.7, 128.4, 128.0, 127.9, 127.7, 127.6, 127.3, 125.4, 116.0, 112.0, 103.7, 103.0, 96.0, 69.5, 65.9, 33.6.

HRMS (ESI):  $m/z$  calculated for  $\text{C}_{27}\text{H}_{23}\text{N}_2\text{O}_4^+$   $[\text{M}+\text{H}]^+$ , 439.1652; found, 439.1650

**benzyl 2-(7-methoxy-1-oxo-1,2-dihydropyrimido[1,6-a]indol-4-yl)acetate (5ea)**

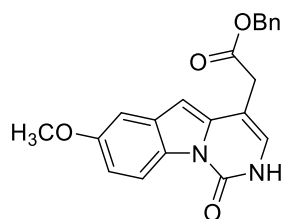

Prepared from 4e (0.2 mmol, 1.0 equiv) and 2a (0.3 mmol, 1.5 equiv) according to the general procedure 5, Purification by flash column (EtOAc/Petroleum Ether = 1/3) afforded **5ea** (57 mg, 79% yield) as solid.

$R_f$  = 0.28 (EtOAc/Petroleum Ether = 1/2)

$^1\text{H}$  NMR (300 MHz,  $\text{DMSO}-d_6$ )  $\delta$  10.87 (d,  $J$  = 5.3 Hz, 1H), 8.39 (d,  $J$  = 9.0 Hz, 1H), 7.40 – 7.31 (m, 5H), 7.13 (d,  $J$  = 2.5 Hz, 1H), 6.97 – 6.88 (m, 2H), 6.43 (s, 1H), 5.14 (s, 2H), 3.81 (s, 3H), 3.71 (s, 2H).

$^{13}\text{C}$  NMR (75 MHz,  $\text{DMSO}-d_6$ )  $\delta$  170.5, 156.2, 147.4, 137.1, 136.1, 130.8, 128.4, 128.1, 128.0, 127.2, 125.4, 116.1, 111.4, 103.8, 101.6, 96.1, 66.0, 55.3, 33.7.

HRMS (ESI):  $m/z$  calculated for  $\text{C}_{21}\text{H}_{19}\text{N}_2\text{O}_4^+$   $[\text{M}+\text{H}]^+$ , 363.1339; found, 363.1321

**benzyl 2-(7-chloro-1-oxo-1,2-dihydropyrimido[1,6-a]indol-4-yl)acetate (5fa)**

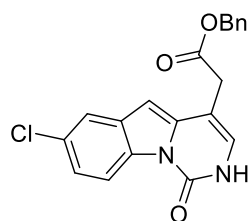



Prepared from 4f (0.2 mmol, 1.0 equiv) and 2a (0.3 mmol, 1.5 equiv) according to the general procedure 5, Purification by flash column (EtOAc/Petroleum Ether = 1/3) afforded **5fa** (42 mg, 58% yield) as solid.

R<sub>f</sub> = 0.27 (EtOAc/Petroleum Ether = 1/2)

<sup>1</sup>H NMR (400 MHz, DMSO-*d*<sub>6</sub>) δ 11.03 (d, *J* = 4.3 Hz, 1H), 8.50 (d, *J* = 8.8 Hz, 1H), 7.72 (d, *J* = 2.1 Hz, 1H), 7.37 – 7.32 (m, 5H), 7.30 (dd, *J* = 8.7, 2.1 Hz, 1H), 7.02 (d, *J* = 4.3 Hz, 1H), 6.52 (s, 1H), 5.14 (s, 2H), 3.74 (s, 2H).

<sup>13</sup>C NMR (75 MHz, DMSO-*d*<sub>6</sub>) δ 170.4, 147.3, 138.0, 136.0, 131.2, 130.9, 128.4, 128.1, 128.1, 128.0, 126.4, 121.9, 119.0, 116.7, 103.8, 95.7, 66.0, 33.5.

HRMS (ESI): *m/z* calculated for C<sub>20</sub>H<sub>15</sub>ClNaN<sub>2</sub>O<sub>3</sub><sup>+</sup> [M+Na]<sup>+</sup>, 389.0663, found, 389.0665

#### benzyl 2-(7-bromo-1-oxo-1,2-dihydropyrimido[1,6-a]indol-4-yl)acetate (**5ga**)

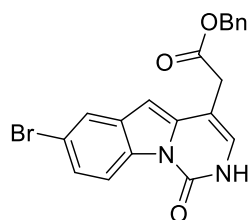

Prepared from 4g (0.2 mmol, 1.0 equiv) and 2a (0.3 mmol, 1.5 equiv) according to the general procedure 5, Purification by flash column (EtOAc/Petroleum Ether = 1/3) afforded **5ga** (42 mg, 51% yield) as solid.

R<sub>f</sub> = 0.30 (EtOAc/Petroleum Ether = 1/2)

<sup>1</sup>H NMR (300 MHz, DMSO-*d*<sub>6</sub>) δ 11.05 (s, 1H), 8.45 (d, *J* = 8.8 Hz, 1H), 7.86 (s, 1H), 7.41 (d, *J* = 10.8 Hz, 1H), 7.38 – 7.31 (m, 5H), 7.02 (s, 1H), 6.51 (s, 1H), 5.14 (s, 2H), 3.73 (s, 2H).

<sup>13</sup>C NMR (75 MHz, DMSO-*d*<sub>6</sub>) δ 170.4, 147.4, 137.9, 136.0, 131.7, 131.2, 128.4, 128.1, 128.0, 126.4, 124.5, 122.0, 117.1, 116.3, 103.8, 95.6, 66.0, 33.5.

HRMS (ESI): *m/z* calculated for C<sub>20</sub>H<sub>16</sub>BrN<sub>2</sub>O<sub>3</sub><sup>+</sup> [M+H]<sup>+</sup>, 411.0339; found, 411.0345

**benzyl 2-(7-methyl-1-oxo-1,2-dihydropyrimido[1,6-a]indol-4-yl)acetate (5ha)**

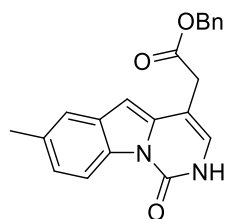

Prepared from 4h (0.2 mmol, 1.0 equiv) and 2a (0.3 mmol, 1.5 equiv) according to the general procedure 5, Purification by flash column (EtOAc/Petroleum Ether = 1/3) afforded **5ha** (24 mg, 35% yield) as solid.

Rf = 0.31 (EtOAc/Petroleum Ether = 1/2)

$^1\text{H}$  NMR (300 MHz, DMSO- $d_6$ )  $\delta$  10.84 (s, 1H), 8.38 (d,  $J$  = 8.4 Hz, 1H), 7.43 (s, 1H), 7.39-7.31 (m, 5H), 7.11 (d,  $J$  = 8.5 Hz, 1H), 6.93 (d,  $J$  = 5.1 Hz, 1H), 6.43 (s, 1H), 5.14 (s, 2H), 3.71 (s, 2H), 2.43 (s, 3H).

$^{13}\text{C}$  NMR (75 MHz, DMSO- $d_6$ )  $\delta$  170.5, 147.5, 136.6, 136.1, 132.5, 130.7, 130.0, 128.4, 128.1, 128.0, 125.3, 123.5, 119.4, 115.0, 103.9, 95.8, 66.0, 33.6, 21.3.

HRMS (ESI):  $m/z$  calculated for  $\text{C}_{21}\text{H}_{19}\text{N}_2\text{O}_3^+$   $[\text{M}+\text{H}]^+$ , 347.1390; found, 347.1395.

**benzyl 2-(8-methyl-1-oxo-1,2-dihydropyrimido[1,6-a]indol-4-yl)acetate (5ia)**

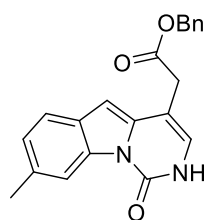

Prepared from 4i (0.2 mmol, 1.0 equiv) and 2a (0.3 mmol, 1.5 equiv) according to the general procedure 5, Purification by flash column (EtOAc/Petroleum Ether = 1/3) afforded **5ia** (40 mg, 58% yield) as solid.

Rf = 0.33 (EtOAc/Petroleum Ether = 1/2)

$^1\text{H}$  NMR (400 MHz,  $\text{DMSO-}d_6$ )  $\delta$  10.80 (d,  $J = 5.0$  Hz, 1H), 8.36 (s, 1H), 7.53 (d,  $J = 8.0$  Hz, 1H), 7.36 – 7.32 (m, 5H), 7.17 (d,  $J = 6.5$  Hz, 1H), 6.90 (d,  $J = 4.8$  Hz, 1H), 6.45 (s, 1H), 5.14 (s, 2H), 3.70 (s, 2H), 2.47 (s, 3H).

$^{13}\text{C}$  NMR (75 MHz,  $\text{DMSO-}d_6$ )  $\delta$  170.5, 147.7, 136.1, 136.0, 132.8, 131.4, 128.4, 128.1, 128.0, 127.5, 125.1, 124.9, 119.4, 115.3, 104.0, 96.1, 66.0, 33.7, 21.6.

HRMS (ESI):  $m/z$  calculated for  $\text{C}_{21}\text{H}_{19}\text{N}_2\text{O}_3^+$   $[\text{M}+\text{H}]^+$ , 347.1390; found, 347.1395

### benzyl 2-(8-bromo-1-oxo-1,2-dihydropyrimido[1,6-a]indol-4-yl)acetate (**5ja**)

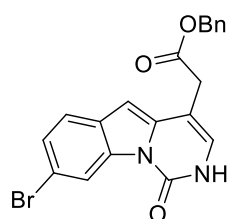

Prepared from **4j** (0.2 mmol, 1.0 equiv) and **2a** (0.3 mmol, 1.5 equiv) according to the general procedure 5, Purification by flash column (EtOAc/Petroleum Ether = 1/3) afforded **5ja** (49 mg, 60% yield) as solid.

$R_f = 0.31$  (EtOAc/Petroleum Ether = 1/2)

$^1\text{H}$  NMR (400 MHz,  $\text{DMSO-}d_6$ )  $\delta$  8.76 (s, 1H), 7.54 (d,  $J = 8.4$  Hz, 1H), 7.40 (d,  $J = 8.4$  Hz, 1H), 7.36 – 7.29 (m, 6H), 7.03 (s, 1H), 6.36 (s, 1H), 5.13 (s, 2H), 3.67 (s, 2H).

$^{13}\text{C}$  NMR (75 MHz,  $\text{DMSO-}d_6$ )  $\delta$  170.3, 147.4, 137.3, 136.0, 132.9, 128.8, 128.4, 128.0, 127.9, 126.4, 126.0, 121.5, 117.7, 114.2, 104.0, 96.1, 66.0, 33.5.

HRMS (ESI):  $m/z$  calculated for  $\text{C}_{20}\text{H}_{16}\text{BrN}_2\text{O}_3^+$   $[\text{M}+\text{H}]^+$ , 411.0339; found, 411.0341

### benzyl 2-(8-chloro-1-oxo-1,2-dihydropyrimido[1,6-a]indol-4-yl)acetate (**5ka**)

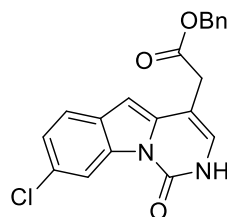

Prepared from 4k (0.2 mmol, 1.0 equiv) and 2a (0.3 mmol, 1.5 equiv) according to the general procedure 5, Purification by flash column (EtOAc/Petroleum Ether = 1/3) afforded **5ka** (42 mg, 57% yield) as solid.

R<sub>f</sub> = 0.34 (EtOAc/Petroleum Ether = 1/2)

<sup>1</sup>H NMR (400 MHz, DMSO-*d*<sub>6</sub>) δ 11.02 (s, 1H), 8.52 (d, *J* = 2.0 Hz, 1H), 7.67 (d, *J* = 8.5 Hz, 1H), 7.38 (d, *J* = 2.0 Hz, 1H), 7.36 – 7.31 (m, 5H), 6.99 (s, 1H), 6.54 (s, 1H), 5.14 (s, 2H), 3.73 (s, 2H).

<sup>13</sup>C NMR (75 MHz, DMSO-*d*<sub>6</sub>) δ 170.4, 147.4, 137.4, 136.0, 132.6, 128.5, 128.4, 128.1, 128.0, 126.2, 125.9, 123.8, 121.1, 114.9, 104.0, 96.1, 66.0, 33.5.

HRMS (ESI): *m/z* calculated for C<sub>20</sub>H<sub>15</sub>ClNaN<sub>2</sub>O<sub>3</sub><sup>+</sup> [M+Na]<sup>+</sup>, 389.0663; found, 389.0673

**benzyl 2-(8-fluoro-1-oxo-1,2-dihydropyrimido[1,6-a]indol-4-yl)acetate (5la)**

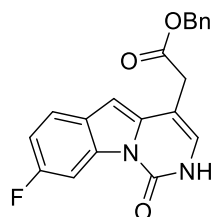

Prepared from 4l(0.2 mmol, 1.0 equiv) and 2a (0.3 mmol, 1.5 equiv) according to the general procedure 5, Purification by flash column (EtOAc/Petroleum Ether = 1/3) afforded **5la** (42 mg, 62% yield) as solid.

R<sub>f</sub> = 0.32 (EtOAc/Petroleum Ether = 1/2)

<sup>1</sup>H NMR (400 MHz, DMSO-*d*<sub>6</sub>) δ 8.29 (dd, *J* = 10.4, 2.5 Hz, 1H), 7.63 (dd, *J* = 8.7, 5.5 Hz, 1H), 7.37 – 7.30 (m, 6H), 7.19 (td, *J* = 9.1, 2.6 Hz, 1H), 6.97 (s, 1H), 6.44 (s, 1H), 5.14 (s, 2H), 3.69 (s, 2H).

<sup>13</sup>C NMR (101 MHz, DMSO) δ 170.5, 158.3(d, *J* = 237.4 Hz), 147.5, 137.2(d, *J* = 3.0 Hz), 136.0, 132.1(d, *J* = 13.1 Hz), 128.4, 128.1, 128.0, 126.4, 125.3, 120.9(d, *J* = 10.1 Hz), 112.0(d, *J* = 24.2 Hz), 104.1, 101.9(d, *J* = 28.3 Hz), 96.1, 66.0, 33.6.

HRMS (ESI):  $m/z$  calculated for  $C_{20}H_{15}FNaN_2O_3^+$   $[M+Na]^+$ , 373.0959; found, 373.0963

**benzyl 2-(1-oxo-1,2-dihydropyrrolo[1,2-c]pyrimidin-4-yl)acetate(5ma)**

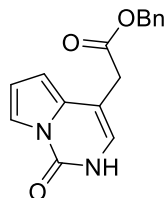

Prepared from 4m (0.2 mmol, 1.0 equiv) and 2a (0.3 mmol, 1.5 equiv) according to the general procedure 5, Purification by flash column (EtOAc/Petroleum Ether = 1/3) afforded **5ma** (46 mg, 82% yield) as solid.

R<sub>f</sub> = 0.3 (EtOAc/Petroleum Ether = 1/2)

<sup>1</sup>H NMR (400 MHz, DMSO-*d*<sub>6</sub>) δ 10.88 (s, 1H), 7.49 (dd, *J* = 3.1, 1.4 Hz, 1H), 7.36 – 7.36 – 7.30 (m, 5H), 6.74 (s, 1H), 6.61 (t, *J* = 3.3 Hz, 1H), 6.25 (dd, *J* = 3.6, 1.5 Hz, 1H), 5.12 (s, 2H), 3.64 (s, 2H).

<sup>13</sup>C NMR (126 MHz, DMSO-*d*<sub>6</sub>) δ 170.5, 146.0, 136.0, 132.0, 128.4, 128.1, 127.9, 121.2, 114.0, 113.8, 104.9, 102.7, 65.9, 33.7.

HRMS (ESI):  $m/z$  calculated for  $C_{16}H_{15}N_2O_3^+$   $[M+H]^+$ , 283.1077; found, 283.1075

**ethyl 2-(1-oxo-1,2-dihydropyrimido[1,6-a]indol-3-yl)acetate (5ab)**

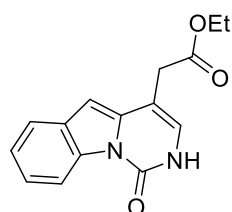

Prepared from 4(0.2 mmol, 1.0 equiv) and 2b (0.3 mmol, 1.5 equiv) according to the general procedure 5, Purification by flash column (EtOAc/Petroleum Ether = 1/3) afforded **5ab** (19 mg, 69% yield) as oil.

R<sub>f</sub> = 0.43 (EtOAc/Petroleum Ether = 1/2)

$^1\text{H}$  NMR (500 MHz,  $\text{CDCl}_3$ )  $\delta$  9.14 (s, 1H), 8.67 – 8.63 (m, 1H), 7.69 – 7.65 (m, 1H), 7.40 – 7.35 (t, 2H), 6.77 (d,  $J = 5.2$  Hz, 1H), 6.59 (s, 1H), 4.20 (q,  $J = 7.1$  Hz, 2H), 3.54 (s, 2H), 1.31 – 1.25 (t, 4H).

$^{13}\text{C}$  NMR (126 MHz,  $\text{CDCl}_3$ )  $\delta$  170.6, 149.0, 135.9, 133.4, 130.2, 124.1, 123.3, 123.1, 120.1, 116.2, 105.5, 98.0, 61.5, 35.0, 14.3.

HRMS (ESI):  $m/z$  calculated for  $\text{C}_{15}\text{H}_{15}\text{N}_2\text{O}_3^+$   $[\text{M}+\text{H}]^+$ , 271.1077; found, 271.1077

### benzyl 2-(4-methyl-1-oxo-1,2-dihydropyrimido[1,6-a]indol-3-yl)acetate (5ac)

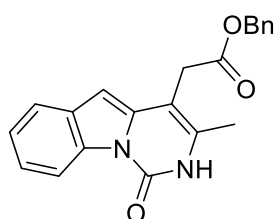

Prepared from 4 (0.2 mmol, 1.0 equiv) and 2c (0.3 mmol, 1.5 equiv) according to the general procedure 5, Purification by flash column (EtOAc/Petroleum Ether = 1/3) afforded **5ca** (23mg, 33% yield) as solid.

$R_f = 0.37$  (EtOAc/Petroleum Ether = 1/2)

$^1\text{H}$  NMR (300 MHz,  $\text{DMSO}-d_6$ )  $\delta$  10.78 (s, 1H), 8.50 (d,  $J = 7.9$  Hz, 1H), 7.67 (d,  $J = 7.6$  Hz, 1H), 7.41 – 7.32 (m, 5H), 7.28 (d,  $J = 8.2$  Hz, 2H), 6.62 (s, 1H), 5.17 (s, 2H), 3.74 (s, 2H), 2.10 (s, 3H).

$^{13}\text{C}$  NMR (75 MHz,  $\text{DMSO}-d_6$ )  $\delta$  168.9, 147.6, 137.9, 135.9, 132.5, 130.1, 128.4, 128.1, 127.9, 127.7, 123.5, 121.8, 119.7, 115.3, 104.3, 96.1, 66.2, 34.5, 11.7.

HRMS (ESI):  $m/z$  calculated for  $\text{C}_{21}\text{H}_{19}\text{N}_2\text{O}_3^+$   $[\text{M}+\text{H}]^+$ , 347.1390; found, 347.1392

### benzyl 2-(1-oxo-1,2-dihydropyrimido[1,6-a]indol-3-yl)propanoate (5ad)

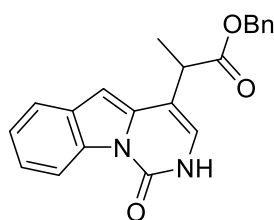

Prepared from 4 (0.2 mmol, 1.0 equiv) and 2d (0.3 mmol, 1.5 equiv) according to the general procedure 5, Purification by flash column (EtOAc/Petroleum Ether = 1/3) afforded **5ad** (37 mg, 54% yield) as solid.

R<sub>f</sub> = 0.40 (EtOAc/Petroleum Ether = 1/2)

<sup>1</sup>H NMR (400 MHz, DMSO-*d*<sub>6</sub>) δ 10.77 (s, 1H), 8.32 (d, *J* = 8.0 Hz, 1H), 7.48 (d, *J* = 7.7 Hz, 1H), 7.21 – 7.16 (m, 4H), 7.15 (d, *J* = 2.7 Hz, 1H), 7.14 – 7.11 (m, 1H), 7.09 (d, *J* = 6.7 Hz, 1H), 6.39 (s, 1H), 6.26 (d, *J* = 1.7 Hz, 1H), 5.00 (s, 2H), 3.62 (q, *J* = 7.2 Hz, 1H), 1.33 (d, *J* = 7.3 Hz, 3H).

<sup>13</sup>C NMR (126 MHz, DMSO-*d*<sub>6</sub>) δ 171.5, 148.0, 137.8, 135.9, 135.7, 132.0, 130.3, 128.4, 128.1, 127.8, 123.5, 121.7, 119.6, 115.2, 96.8, 95.8, 66.2, 41.7, 15.7.

HRMS (ESI): *m/z* calculated for C<sub>21</sub>H<sub>19</sub>N<sub>2</sub>O<sub>3</sub><sup>+</sup> [M+H]<sup>+</sup>, 347.1390; found, 347.1393

**(2,2,7,7-tetramethyltetrahydro-5H-bis([1,3]dioxolo)[4,5-b:4',5'-d]pyran-5-yl)methyl 2-(1-oxo-1,2-dihydropyrimido[1,6-a]indol-3-yl)acetate (5ae)**

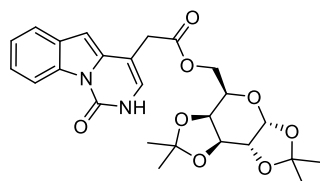

Prepared from 4 (0.2 mmol, 1.0 equiv) and 2e (0.3 mmol, 1.5 equiv) according to the general procedure 5, Purification by flash column (EtOAc/Petroleum Ether = 1/3) afforded **5ae** (60 mg, 62% yield) as oil.

R<sub>f</sub> = 0.35 (EtOAc/Petroleum Ether = 1/2)

<sup>1</sup>H NMR (500 MHz, CDCl<sub>3</sub>) δ 9.29 (d, *J* = 5.3 Hz, 1H), 8.67 – 8.62 (t, 1H), 7.69 – 7.62 (t, 1H), 7.39 – 7.33 (t, 2H), 6.83 (d, *J* = 5.2 Hz, 1H), 6.59 (s, 1H), 5.54 (d, *J* = 5.0 Hz, 1H), 4.58 (d, *J* = 10.4 Hz, 1H), 4.34 (d, *J* = 4.1 Hz, 1H), 4.32 (m, *J* = 3.2 Hz, 2H), 4.19 (d, *J* = 7.8 Hz, 1H), 4.06 – 4.02 (m, 1H), 3.58 (d, *J* = 5.0 Hz, 2H), 1.44 (s, 3H), 1.37 (s, 3H), 1.30 (s, 3H), 1.29 (s, 3H).

$^{13}\text{C}$  NMR (126 MHz,  $\text{CDCl}_3$ )  $\delta$  170.5, 149.1, 135.8, 133.4, 130.3, 124.0, 123.5, 123.0, 120.2, 116.2, 109.9, 109.0, 105.2, 97.9, 96.4, 71.1, 70.8, 70.5, 66.1, 64.4, 34.7, 26.1, 25.9, 25.0, 24.6.

HRMS (ESI):  $m/z$  calculated for  $\text{C}_{25}\text{H}_{29}\text{N}_2\text{O}_8^+$   $[\text{M}+\text{H}]^+$ , 485.1918; found, 485.1920

**(8R,9S,13S,14S)-13-methyl-17-oxo-7,8,9,11,12,13,14,15,16,17-decahydro-6H-cyclopenta[a]phenanthren-3-yl 2-(1-oxo-1,2-dihydropyrimido[1,6-a]indol-3-yl)acetate (5ag)**

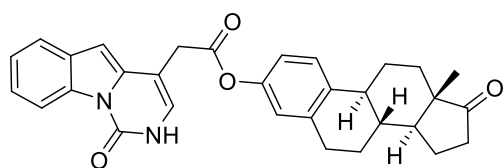

Prepared from **4** (0.2 mmol, 1.0 equiv) and **2g** (0.3 mmol, 1.5 equiv) according to the general procedure 5, Purification by flash column (EtOAc/Petroleum Ether = 1/4) afforded **5ag** (28 mg, 28% yield) as solid.

$^1\text{H}$  NMR (300 MHz,  $\text{CDCl}_3$ )  $\delta$  9.25 (d,  $J = 5.3$  Hz, 1H), 8.69 (d,  $J = 5.3$  Hz, 1H), 7.70 (dd,  $J = 6.3, 2.9$  Hz, 1H), 7.41 (dt,  $J = 6.3, 3.8$  Hz, 2H), 7.30 – 7.26 (m, 1H), 6.89 – 6.82 (m, 2H), 6.80 (d,  $J = 2.5$  Hz, 1H), 6.71 (s, 1H), 3.79 (s, 2H), 2.89 (dd,  $J = 9.0, 4.3$  Hz, 2H), 2.52 (dd,  $J = 18.6, 8.5$  Hz, 1H), 2.43 – 2.35 (m, 1H), 2.31 – 2.21 (m, 1H), 2.17 (d,  $J = 9.2$  Hz, 1H), 2.07 – 2.01 (m, 2H), 1.98 (d,  $J = 2.9$  Hz, 1H), 1.64 – 1.57 (m, 2H), 1.41 (d,  $J = 10.2$  Hz, 1H), 1.38 – 1.33 (m, 1H), 1.30 – 1.26 (m, 2H), 0.91 (s, 3H).

$^{13}\text{C}$  NMR (126 MHz,  $\text{CDCl}_3$ )  $\delta$  169.4, 149.0, 148.6, 138.3, 137.8, 135.7, 133.5, 130.2, 126.6, 124.2, 123.7, 123.2, 121.5, 120.2, 118.6, 116.2, 105.0, 98.1, 50.6, 48.1, 44.3, 38.1, 36.0, 35.1, 31.7, 29.8, 29.5, 26.4, 25.9, 21.7, 13.9.

HRMS (ESI):  $m/z$  calculated for  $\text{C}_{31}\text{H}_{31}\text{N}_2\text{O}_4^+$   $[\text{M}+\text{H}]^+$ , 495.2278; found, 495.2284

**(4S,5'R,6aR,6bS,8aS,8bR,9S,10R,11aS,12aS,12bS)-5',6a,8a,9-tetramethyl-1,3,3',4,4',5,5',6,6a,6b,6',7,8,8a,8b,9,11a,12,12a,12bicosahydrospiro[naphtho[2',1'**



**:4,5]indeno[2,1-b]furan-10,2'-pyran]-4-yl 2-(1-oxo-1,2-dihydropyrimido[1,6-a]indol-3-yl)acetate (5ah)**

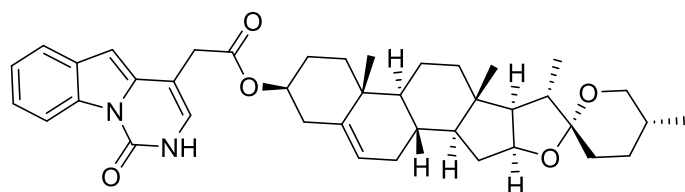

Prepared from 4 (0.2 mmol, 1.0 equiv) and 2h (0.3 mmol, 1.5 equiv) according to the general procedure 5, Purification by flash column (EtOAc/Petroleum Ether = 1/4) afforded **5ah** (42 mg, 33% yield) as oil.

R<sub>f</sub> = 0.35 (EtOAc/Petroleum Ether = 1/3)

<sup>1</sup>H NMR (300 MHz, CDCl<sub>3</sub>) δ 8.67 (dd, *J* = 8.1, 5.3 Hz, 2H), 7.67 (t, *J* = 3.5 Hz, 1H), 7.38 (q, *J* = 3.6, 2.9 Hz, 2H), 6.75 (d, *J* = 5.3 Hz, 1H), 6.59 (s, 1H), 5.36 (d, *J* = 5.1 Hz, 1H), 4.71 – 4.62 (m, 1H), 4.46 – 4.38 (m, 1H), 3.52 (s, 2H), 3.46 – 3.31 (m, 2H), 2.33 (d, *J* = 8.2 Hz, 2H), 2.00 (d, *J* = 5.6 Hz, 1H), 1.96 (d, *J* = 5.6 Hz, 1H), 1.88 – 1.81 (m, 3H), 1.75 (d, *J* = 6.5 Hz, 1H), 1.48 (q, *J* = 5.8, 4.6 Hz, 4H), 1.42 (d, *J* = 4.1 Hz, 1H), 1.26 (s, 7H), 1.17 (d, *J* = 5.7 Hz, 1H), 1.11 (d, *J* = 4.3 Hz, 2H), 1.03 (s, 3H), 0.97 (d, *J* = 6.8 Hz, 3H), 0.87 (d, *J* = 7.5 Hz, 2H), 0.78 (s, 5H).

<sup>13</sup>C NMR (126 MHz, CDCl<sub>3</sub>) δ 169.9, 139.4, 135.7, 133.3, 130.1, 124.0, 123.1, 123.0, 122.6, 1200, 116.1, 109.3, 105.5, 97.9, 80.8, 75.0, 66.9, 62.1, 56.4, 49.9, 41.6, 40.3, 39.7, 38.0, 36.9, 36.7, 35.1, 32.0, 31.8, 31.4, 30.3, 29.7, 28.8, 27.7, 20.8, 19.3, 17.1, 16.3, 14.5, 14.1.

HRMS (ESI): *m/z* calculated for C<sub>40</sub>H<sub>51</sub>N<sub>2</sub>O<sub>5</sub><sup>+</sup> [M+H]<sup>+</sup>, 639.3793; found, 639.3796

**(3S,8S,9S,10R,13R,14S,17R)-17-((R)-heptan-2-yl)-10,13-dimethyl-2,3,4,7,8,9,10,11,12,13,14,15,16,17-tetradecahydro-1H-cyclopenta[a]phenanthren-3-yl 2-(1-oxo-1,2-dihydropyrimido[1,6-a]indol-3-yl)acetate (5ai)**

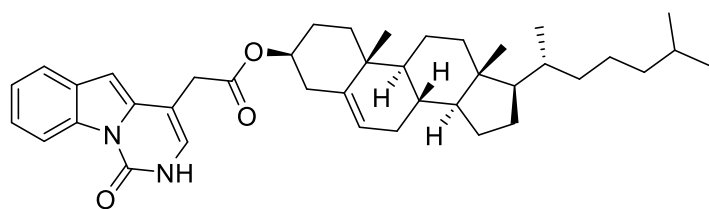

Prepared from **4** (0.2 mmol, 1.0 equiv) and **2i** (0.3 mmol, 1.5 equiv) according to the general procedure 5, Purification by flash column (EtOAc/Petroleum Ether = 1/4) afforded **5ai** (82 mg, 69% yield) as solid.

R<sub>f</sub> = 0.35 (EtOAc/Petroleum Ether = 1/3)

<sup>1</sup>H NMR (300 MHz, CDCl<sub>3</sub>) δ 8.65 (d, *J* = 5.0 Hz, 1H), 8.35 (s, 1H), 7.65 (s, 1H), 7.38 (s, 2H), 6.75 (s, 1H), 6.59 (s, 1H), 5.37 (s, 1H), 4.67 (d, *J* = 10.2 Hz, 1H), 3.52 (s, 2H), 2.33 (d, *J* = 8.3 Hz, 2H), 1.96 (d, *J* = 15.4 Hz, 3H), 1.85 (d, *J* = 11.9 Hz, 3H), 1.48 (s, 4H), 1.33 (s, 4H), 1.26 (s, 4H), 1.15 – 1.09 (m, 5H), 1.04 – 0.96 (m, 6H), 0.91 (d, *J* = 6.2 Hz, 4H), 0.86 (d, *J* = 6.7 Hz, 7H), 0.67 (s, 3H).

<sup>13</sup>C NMR (75 MHz, CDCl<sub>3</sub>) δ 170.0, 149.9, 139.6, 134.0, 131.1, 124.1, 123.1, 123.1, 120.1, 116.2, 105.7, 98.1, 75.3, 56.9, 56.3, 50.2, 42.5, 39.9, 39.7, 38.2, 37.1, 36.8, 36.4, 35.9, 35.3, 32.0, 28.4, 28.2, 27.9, 24.4, 24.0, 23.0, 22.7, 21.2, 19.5, 18.9, 12.0.

HRMS (ESI): *m/z* calculated for C<sub>40</sub>H<sub>55</sub>N<sub>2</sub>O<sub>3</sub><sup>+</sup> [M+H]<sup>+</sup>, 611.4207; found, 611.4211

## 7. References

- [1] Wang, H.; Glorius, F. *Angew. Chem. Int. Ed.* **2012**, *51*, 7318-7322.
- [2] Wang, H.; Grohmann, C.; Nimphius, C.; Glorius, F. *J. Am. Chem. Soc.* **2012**, *134*, 19592-19595.
- [3] Wu, J.-Q.; Zhang, S.-S.; Gao, H.; Qi, Z.-S.; Zhou, C.-J.; Ji, W.-W.; Liu, Y.; Chen, Y.; Li, Q.; Li, X.; H. Wang. *J. Am. Chem. Soc.* **2017**, *139*, 3537-3545.
- [4] Zhang, Y.; Zheng, J.; Cui, S. *J. Org. Chem.* **2014**, *79*, 6490-6500.
- [5] Zhang, J.; Wang, M.; Wang, H.; Xu, H.; Chen, J.; Guo, Z.; Ma, B.; Ban S.-R.; Dai H.-X. *Chem. Commun.*, **2021**, *57*, 8656-8659.
- [6] Zhang, Y.; Wang, D.; Cui, S. *Org. Lett.* **2015**, *17*, 2494-2497.
- [7] Chen, X.; Yang, S.; Li, H.; Wang, B.; Song, G. *ACS Catal.* **2017**, *7*, 2392-2396.
- [8] Lin, L.-Z.; Che, Y.-Y.; Bai, P.-B.; Feng, C. *Org. Lett.* **2019**, *21*, 7424-7429.
- [9] Tang, X.; Zhang, Y.; Tang, Y.; Li, Y.; Zhou, J.; Wang, D.; Gao, L.; Su, Z.; Song, Z. *ACS Catal.* **2022**, *12*, 5185-5196.

## 8. Characterization of NMR spectra

### $^1\text{H}$ NMR (300 MHz, $\text{CDCl}_3$ ) Spectra of compound 2g

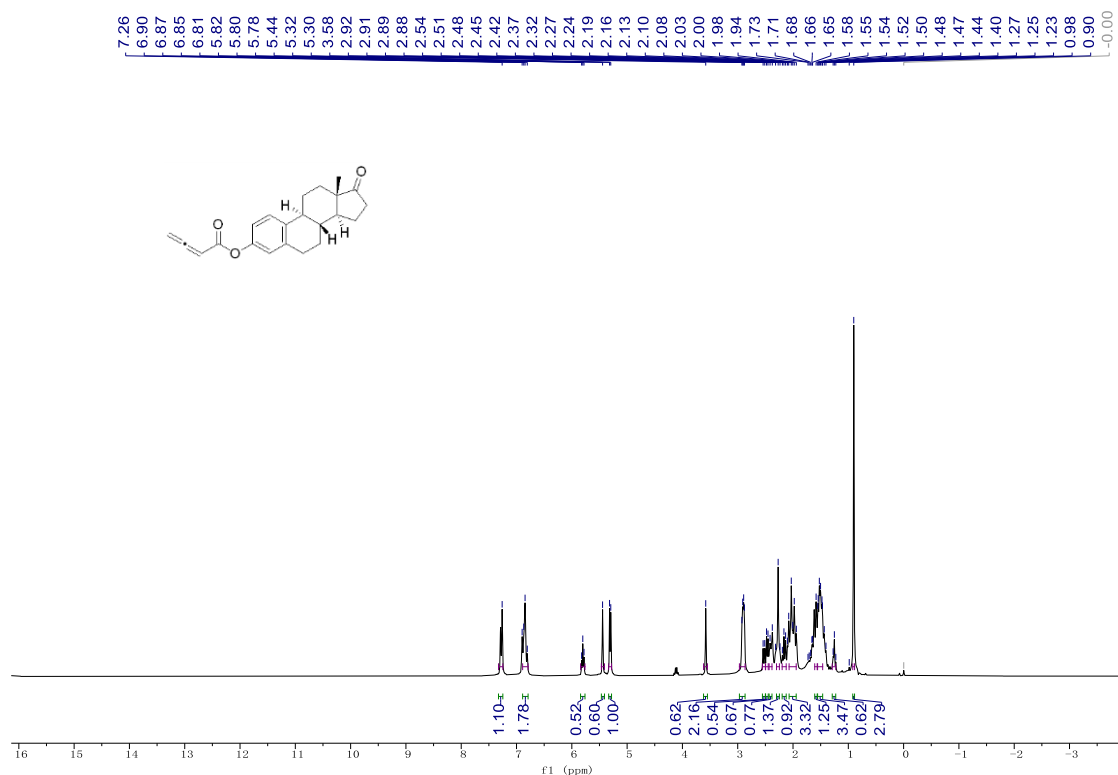

### $^{13}\text{C}$ NMR (75 MHz, $\text{CDCl}_3$ ) Spectra of compound 2g

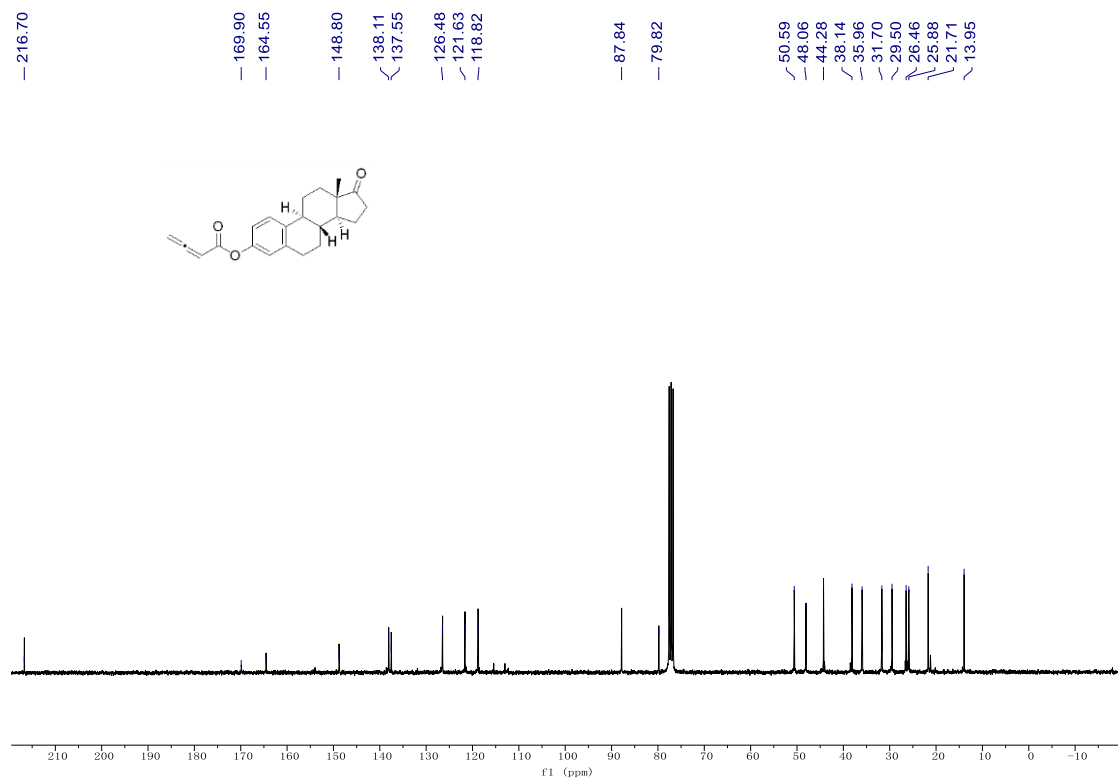

# <sup>1</sup>H NMR (300 MHz, CDCl<sub>3</sub>) Spectra of compound 2h

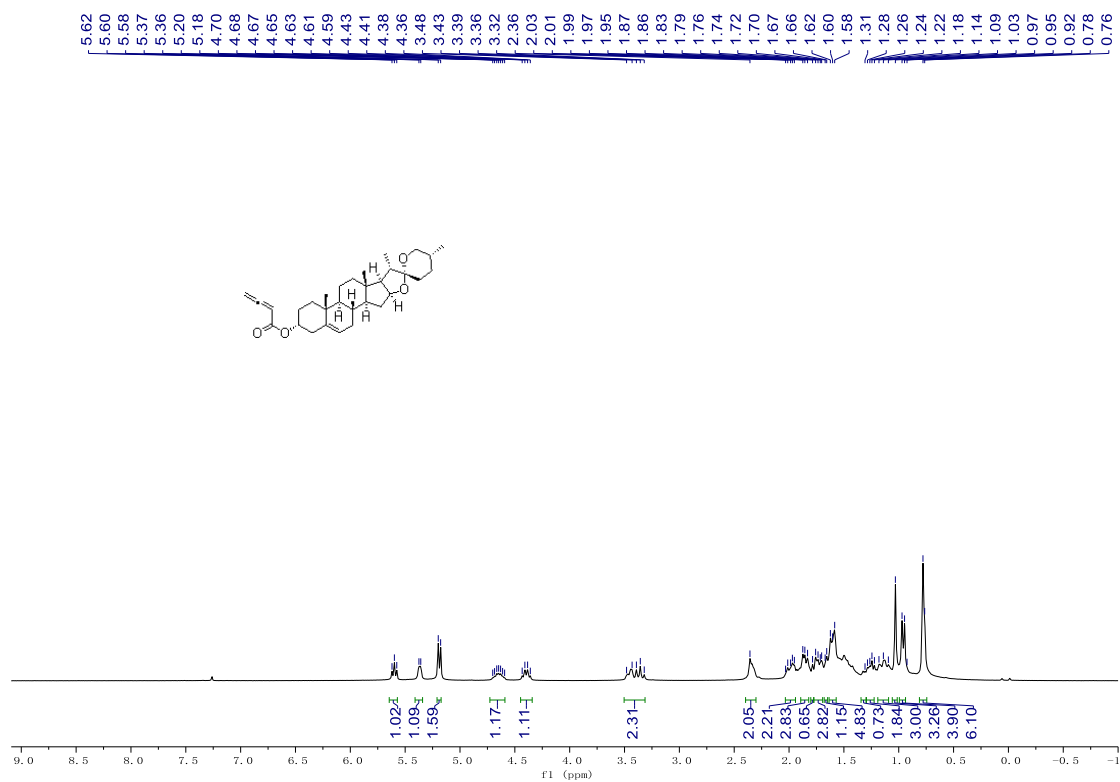

# <sup>13</sup>C NMR (75 MHz, CDCl<sub>3</sub>) Spectra of compound 2h

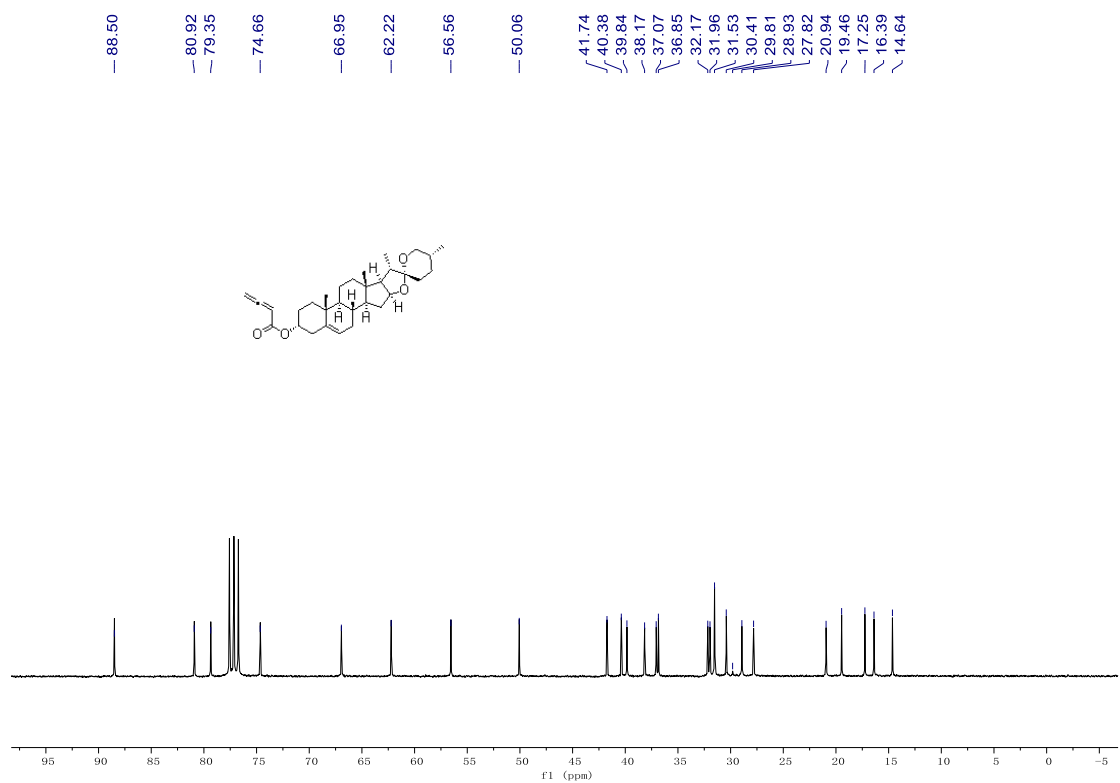

# <sup>1</sup>H NMR (500 MHz, CDCl<sub>3</sub>) Spectra of compound 7

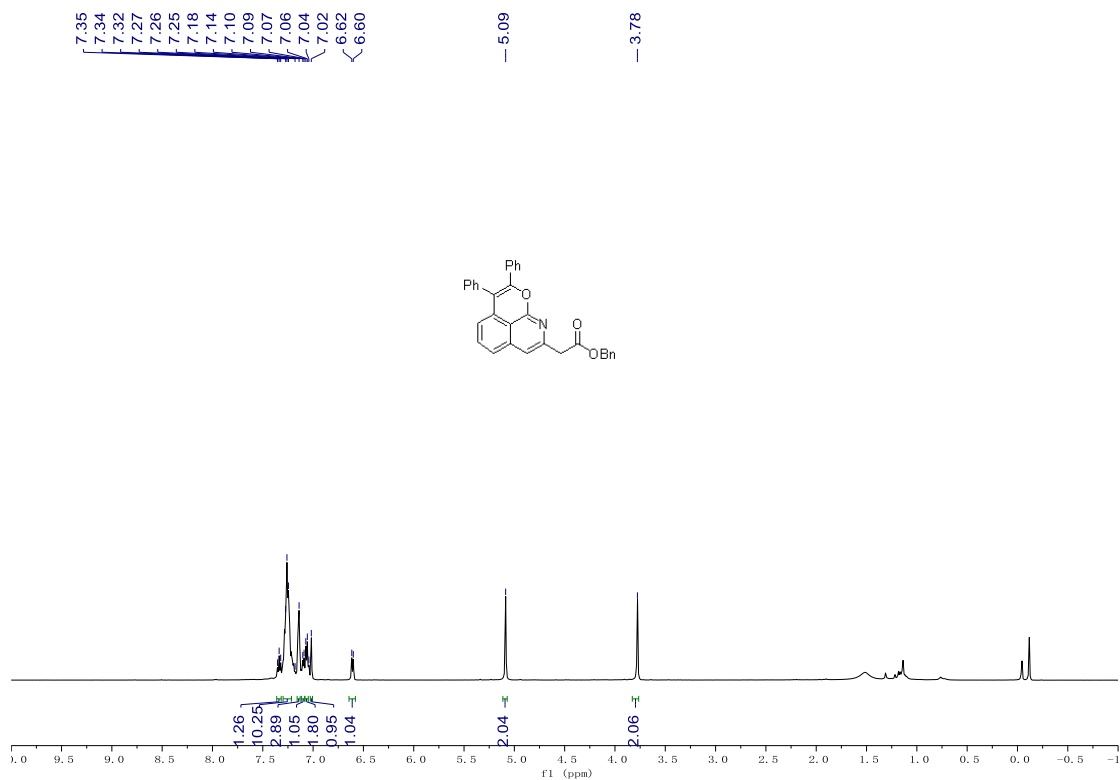

# <sup>13</sup>C NMR (126 MHz, CDCl<sub>3</sub>) Spectra of compound 7

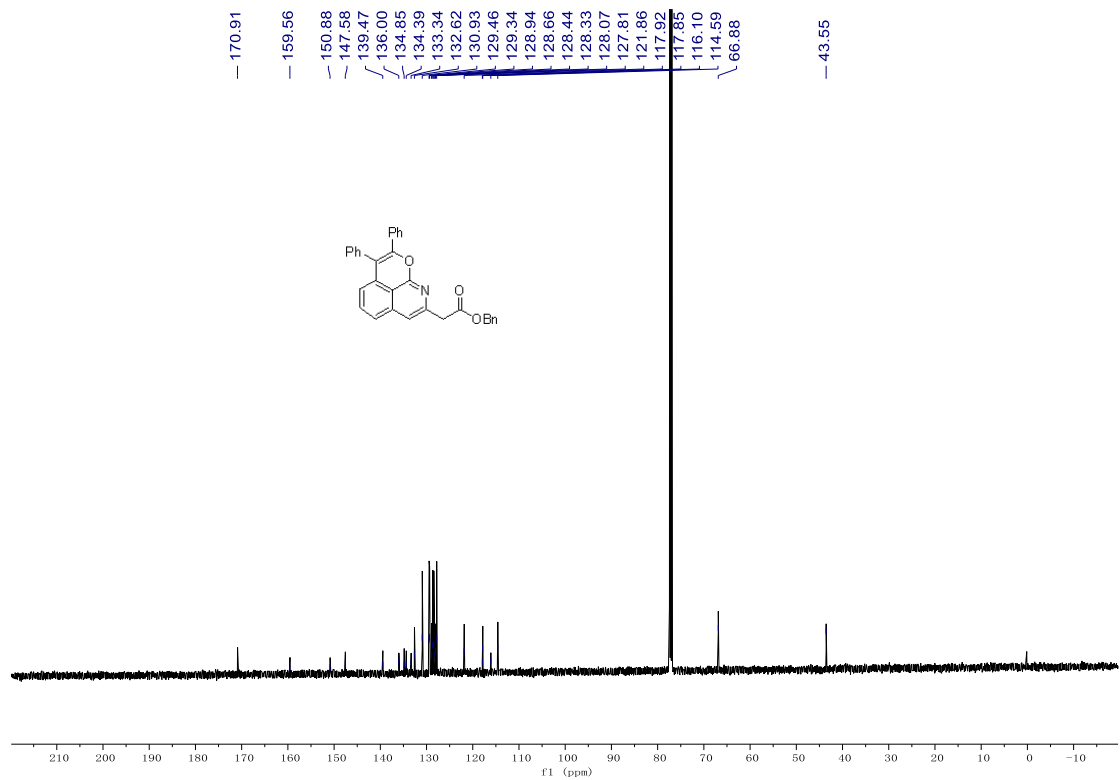

# <sup>1</sup>H NMR (300 MHz, CDCl<sub>3</sub>) Spectra of compound 3aa

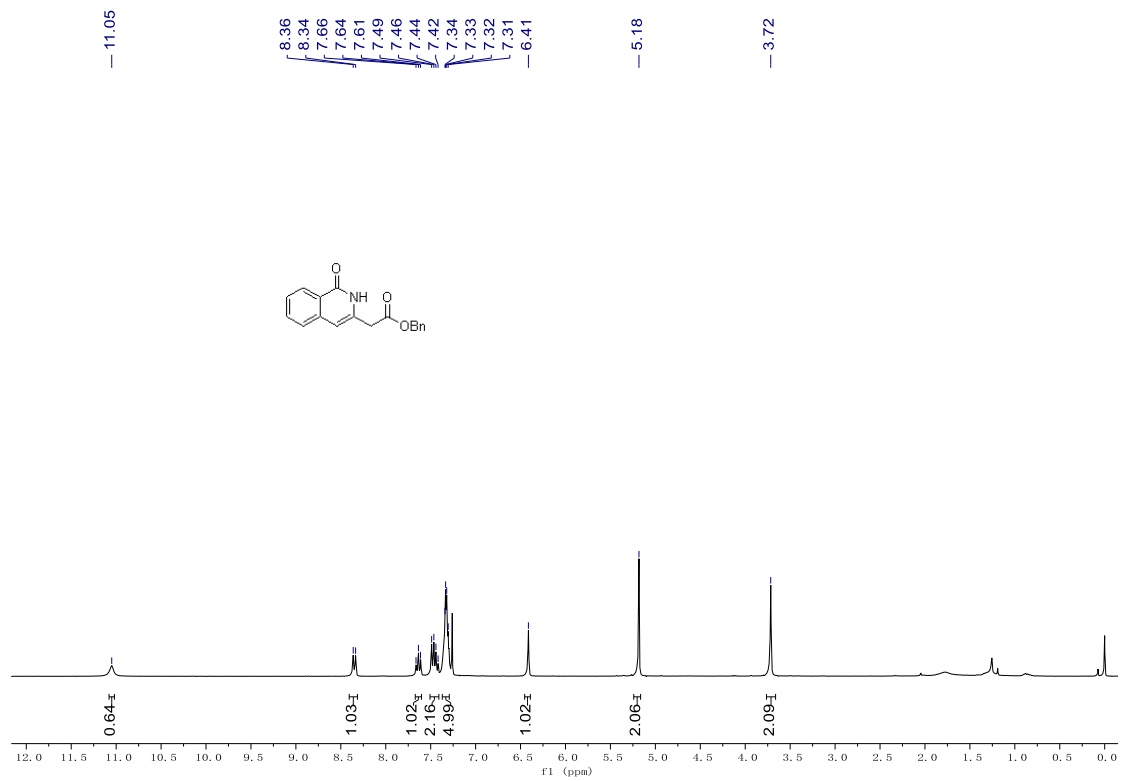

# <sup>13</sup>C NMR (75 MHz, CDCl<sub>3</sub>) Spectra of compound 3aa

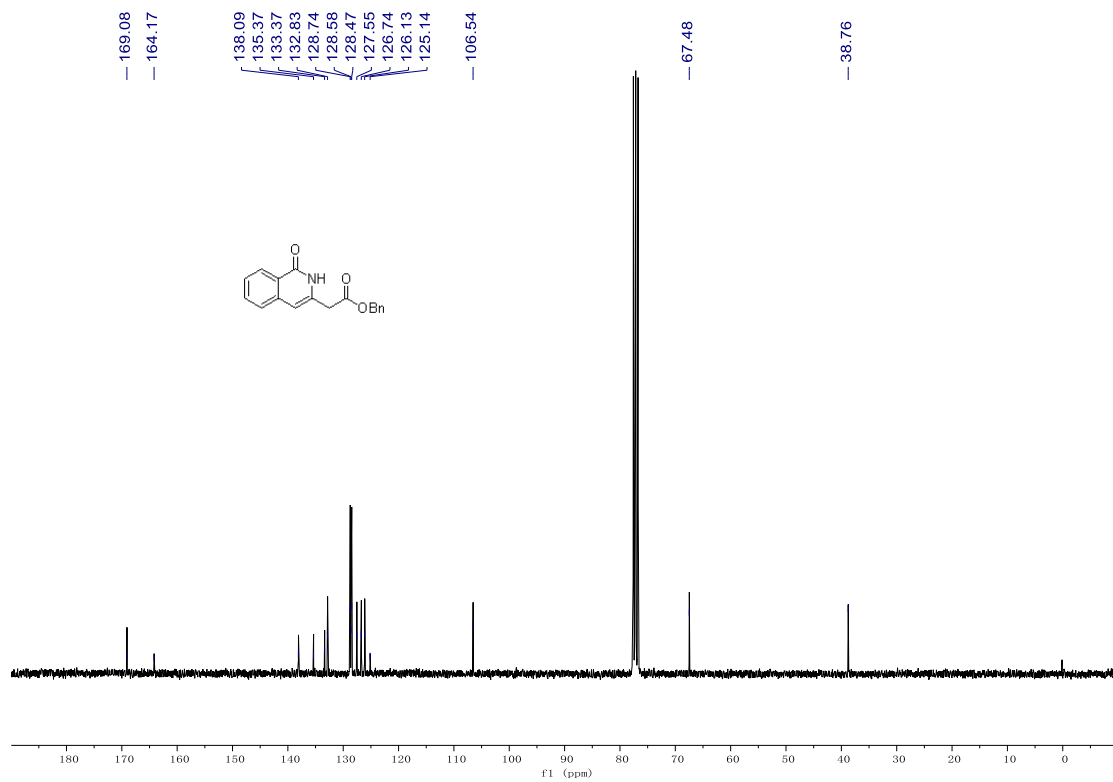

### <sup>1</sup>H NMR (300 MHz, CDCl<sub>3</sub>) Spectra of compound 3ba

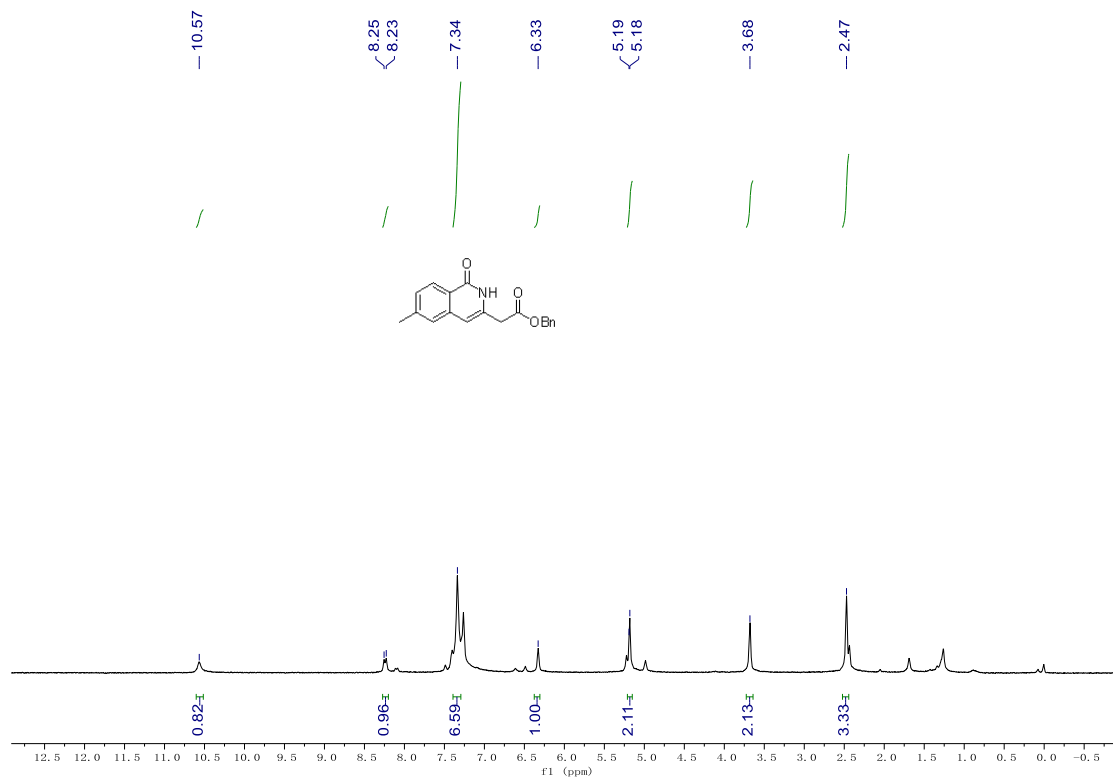

### <sup>13</sup>C NMR (75 MHz, DMSO-*d*<sub>6</sub>) Spectra of compound 3ba

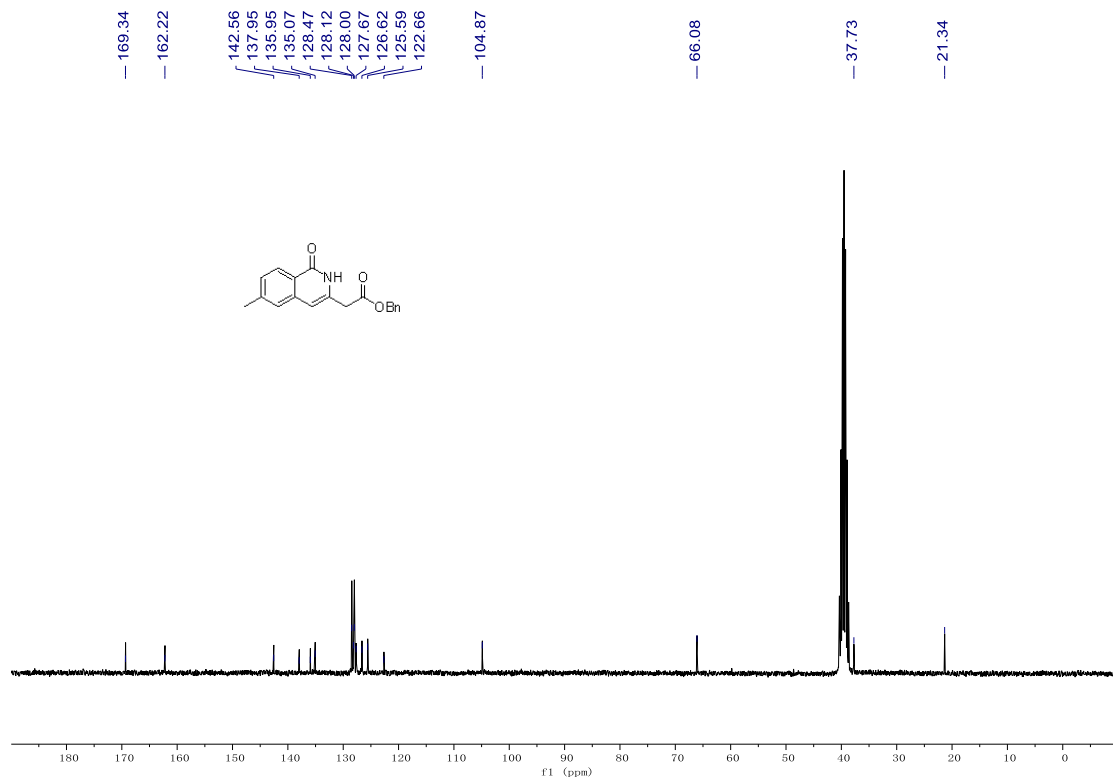



### <sup>1</sup>H NMR (300 MHz, DMSO-*d*<sub>6</sub>) Spectra of compound 3ca

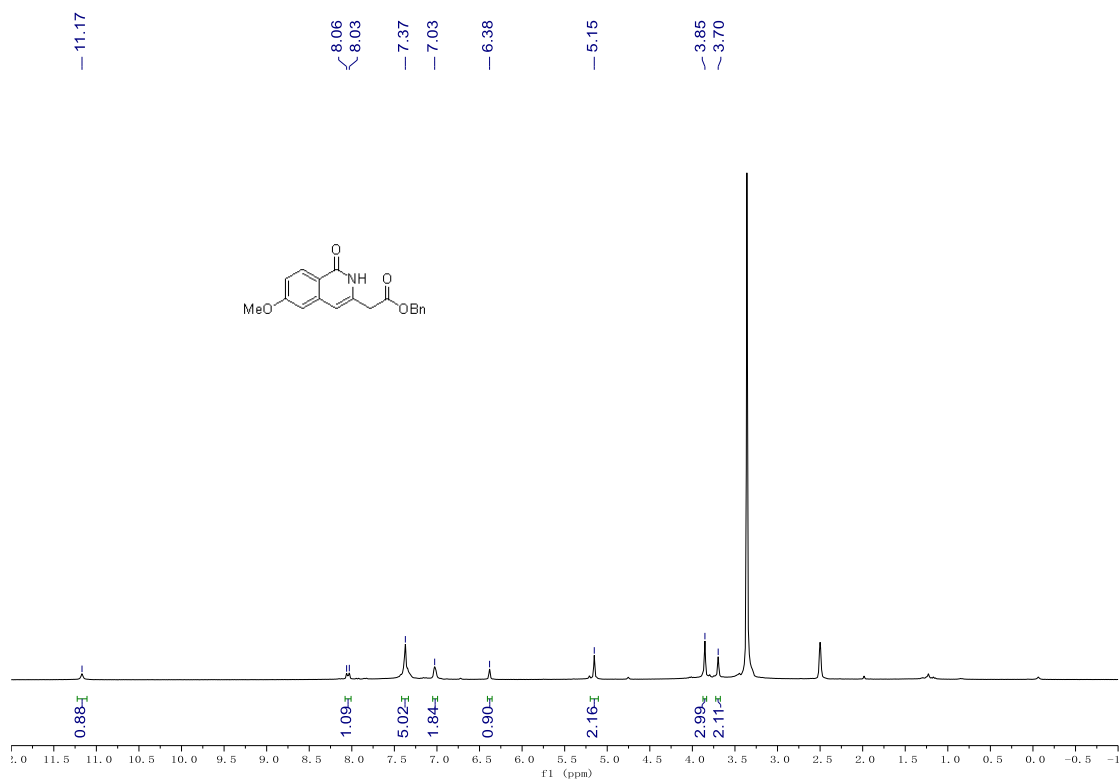

### <sup>13</sup>C NMR (75 MHz, DMSO-*d*<sub>6</sub>) Spectra of compound 3ca

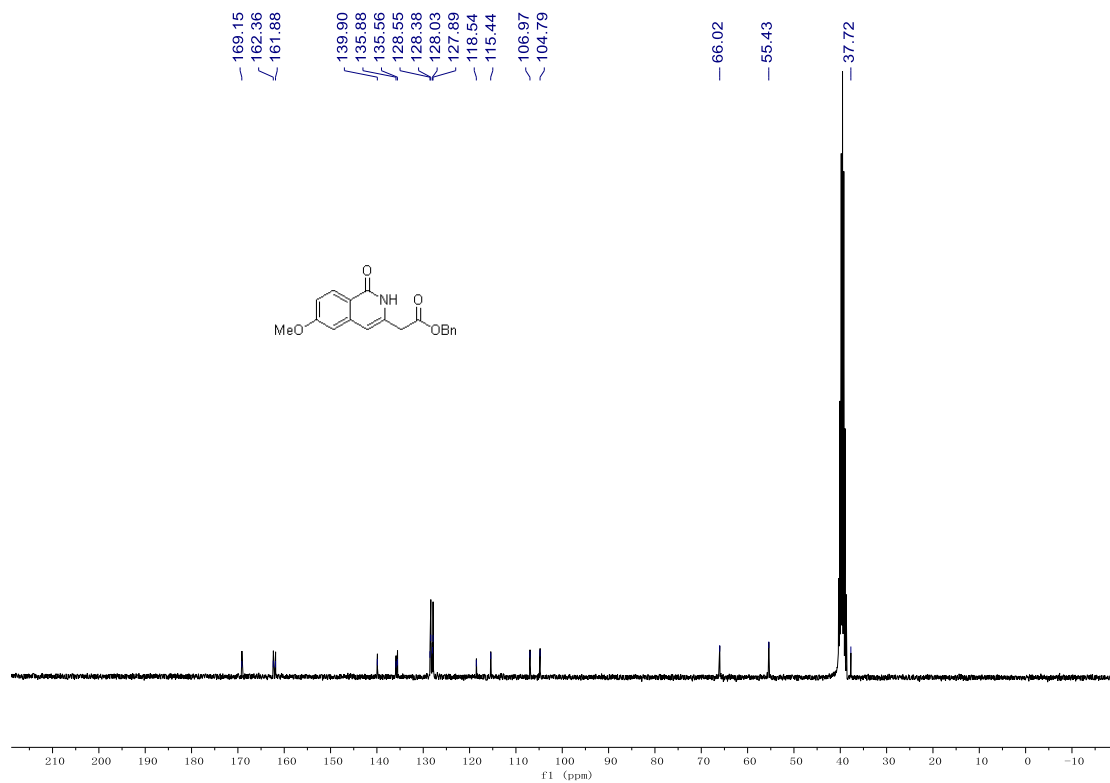

### <sup>1</sup>H NMR (500 MHz, CDCl<sub>3</sub>) Spectra of compound 3da

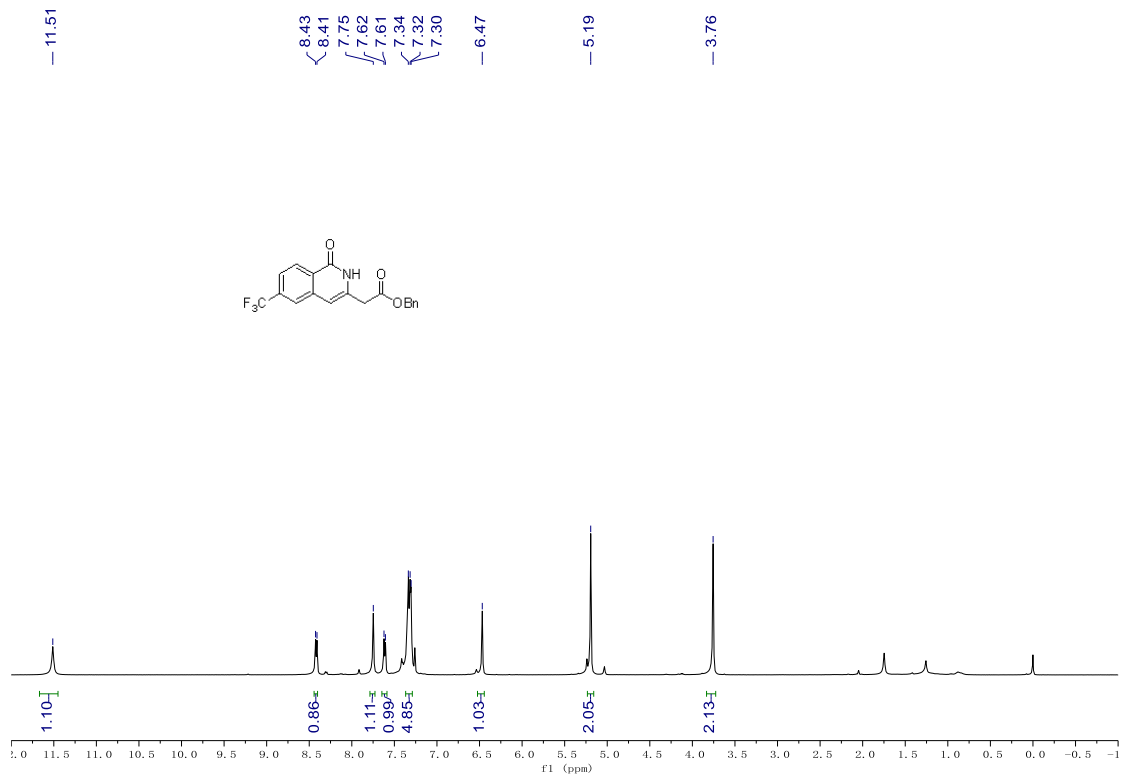

### <sup>13</sup>C NMR (126 MHz, CDCl<sub>3</sub>) Spectra of compound 3da

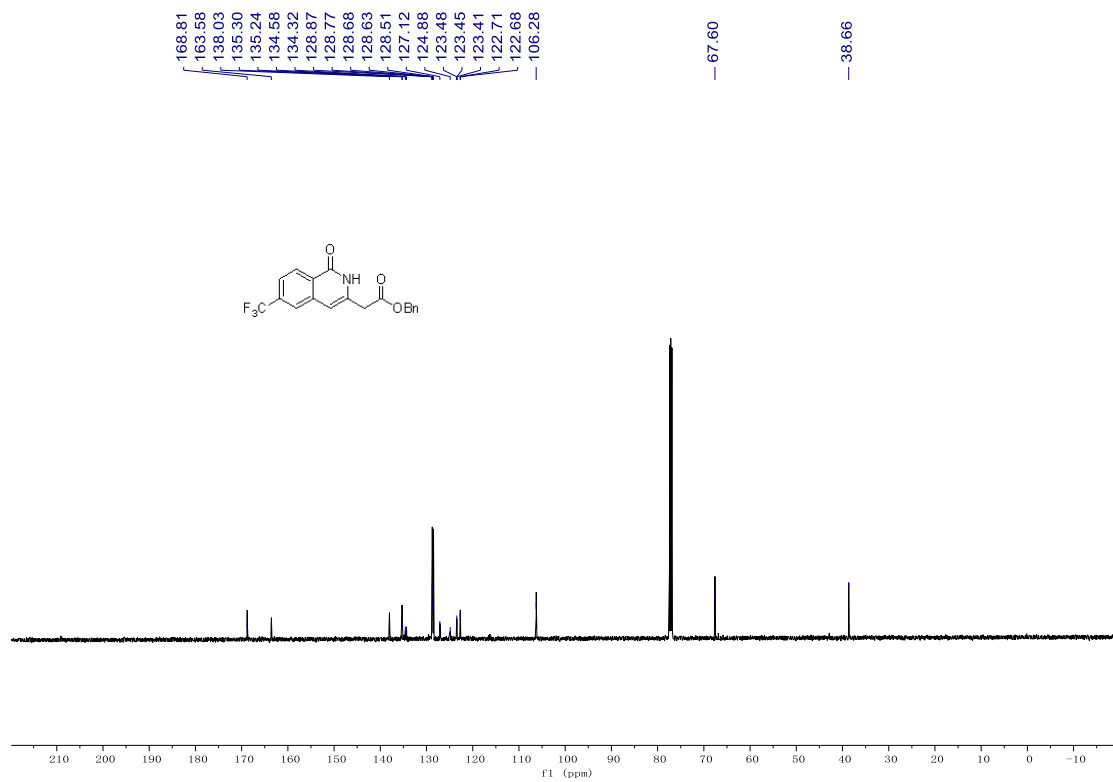

### <sup>1</sup>H NMR (300 MHz, DMSO-*d*<sub>6</sub>) Spectra of compound 3ea

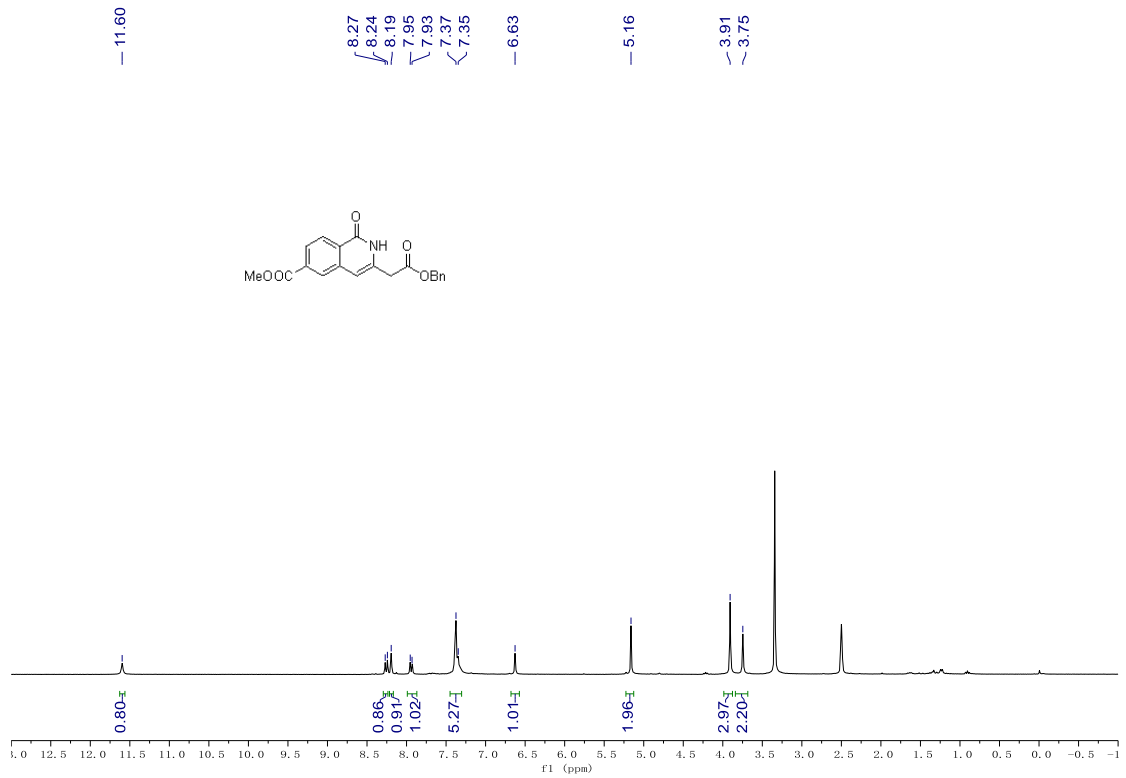

### <sup>13</sup>C NMR (75 MHz, DMSO-*d*<sub>6</sub>) Spectra of compound 3ea

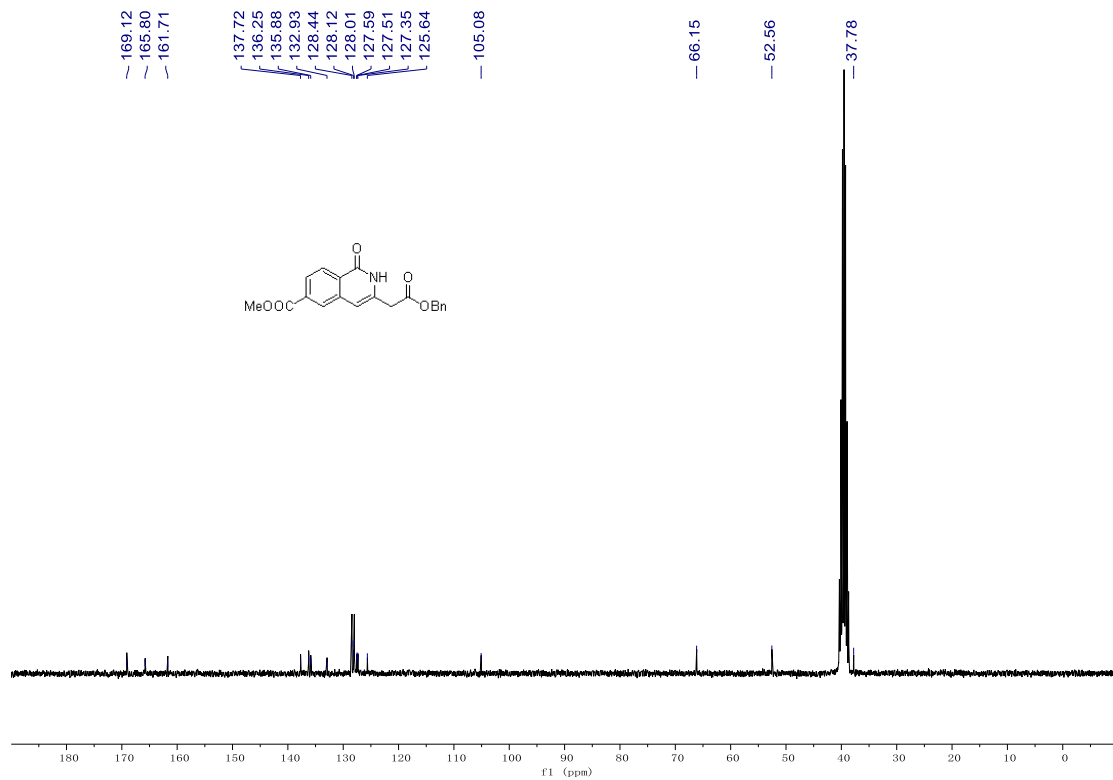

### <sup>1</sup>H NMR (500 MHz, DMSO-*d*<sub>6</sub>) Spectra of compound 3fa

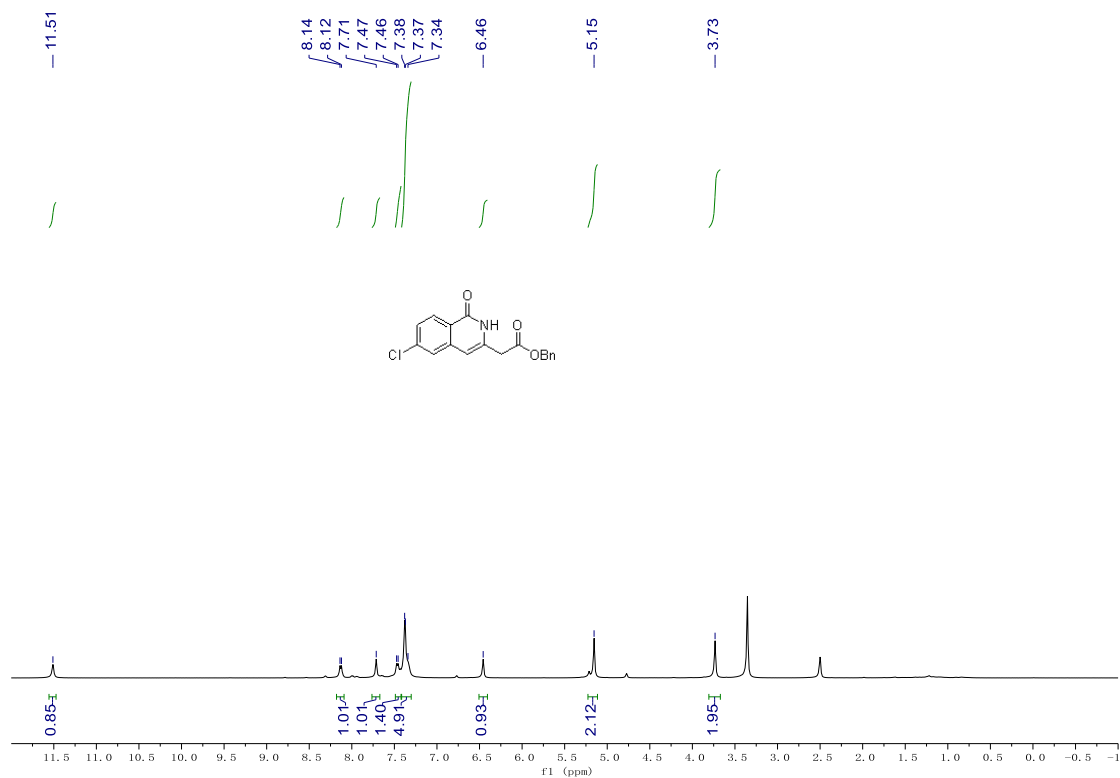

### <sup>13</sup>C NMR (126 MHz, DMSO-*d*<sub>6</sub>) Spectra of compound 3fa

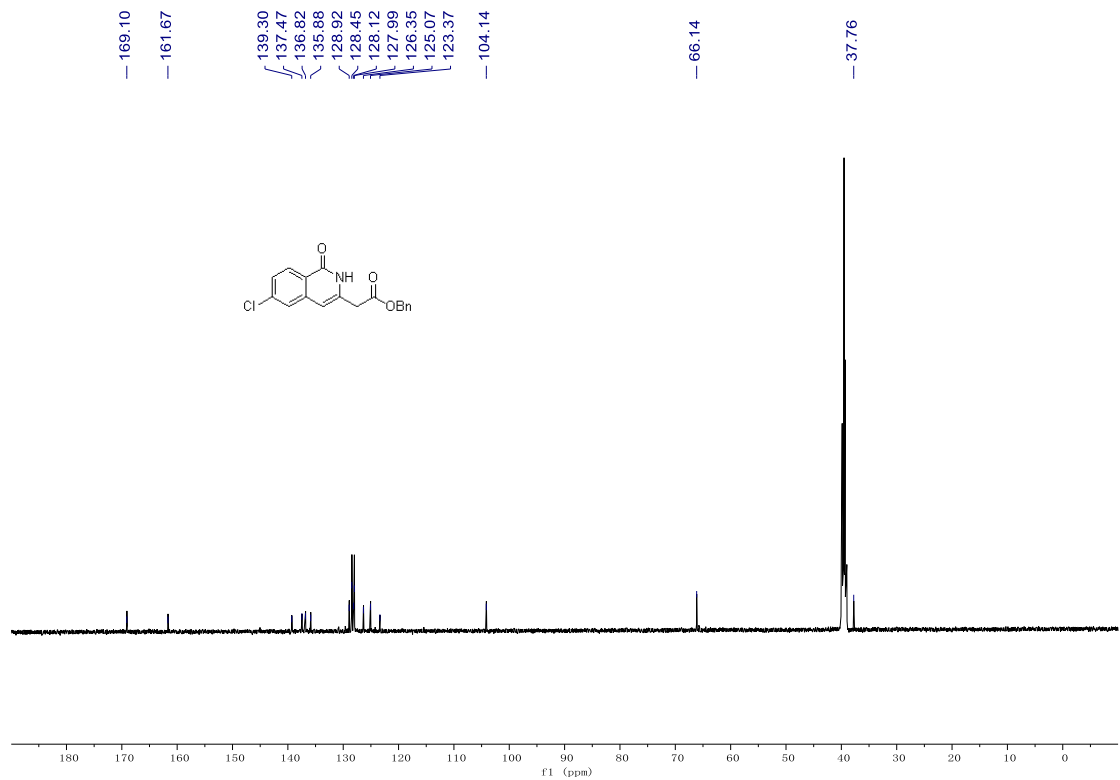

### <sup>1</sup>H NMR (500 MHz, DMSO-*d*<sub>6</sub>) Spectra of compound 3ga

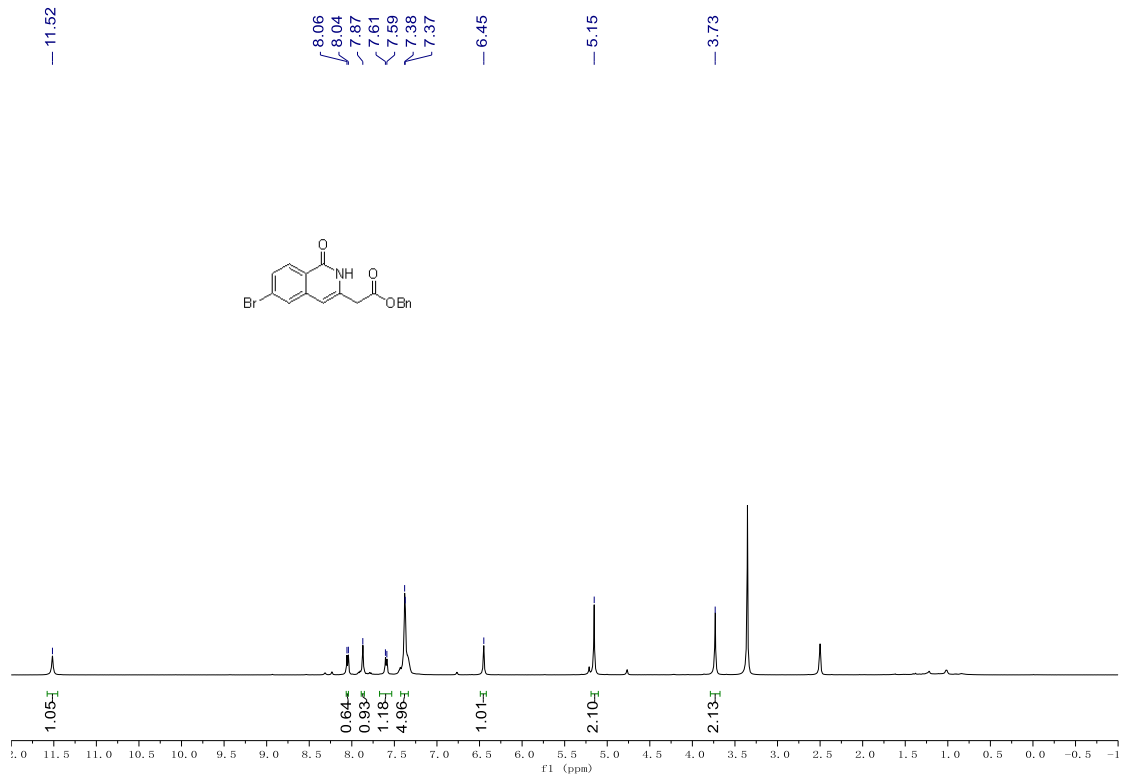

### <sup>13</sup>C NMR (126 MHz, DMSO-*d*<sub>6</sub>) Spectra of compound 3ga

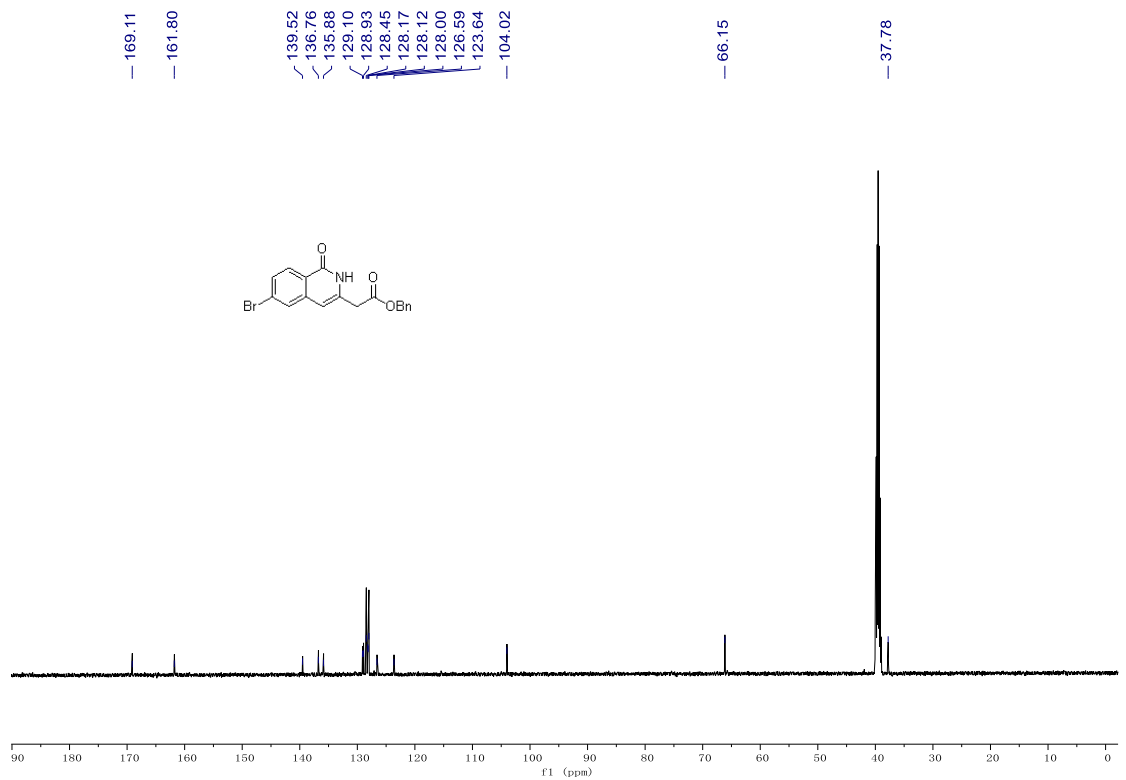

### $^1\text{H}$ NMR (300 MHz, $\text{DMSO-}d_6$ ) Spectra of compound 3ha

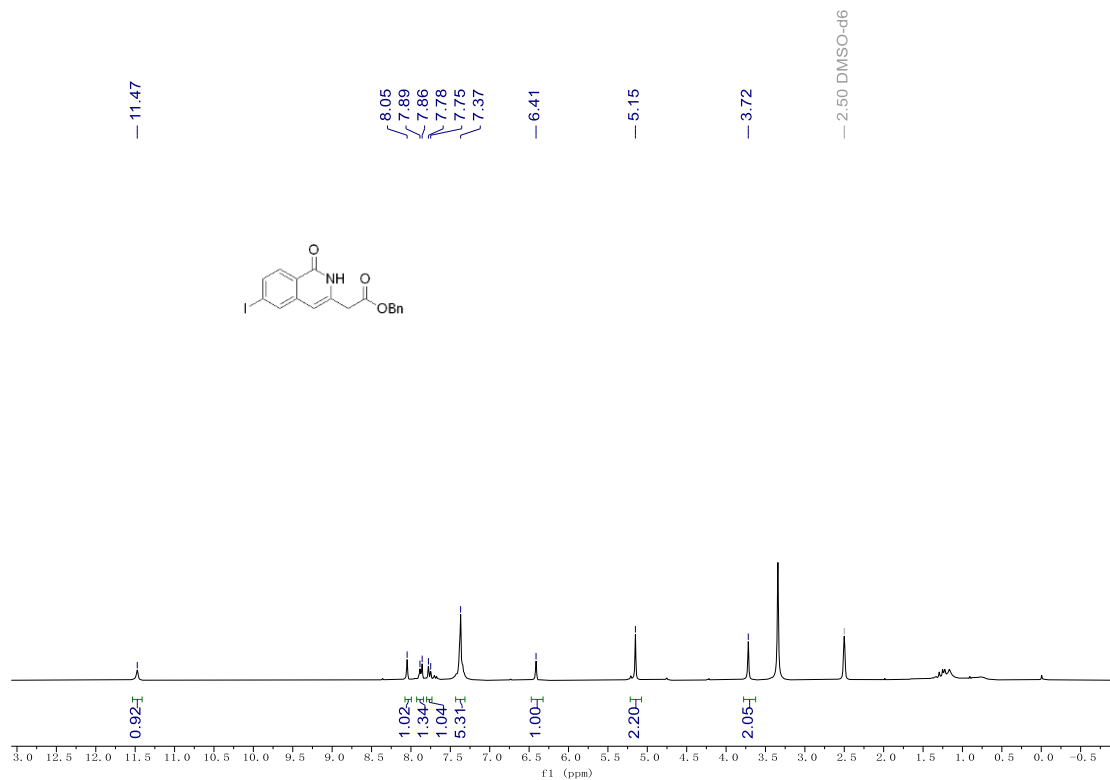

### $^{13}\text{C}$ NMR (75 MHz, $\text{CDCl}_3$ ) Spectra of compound 3ha

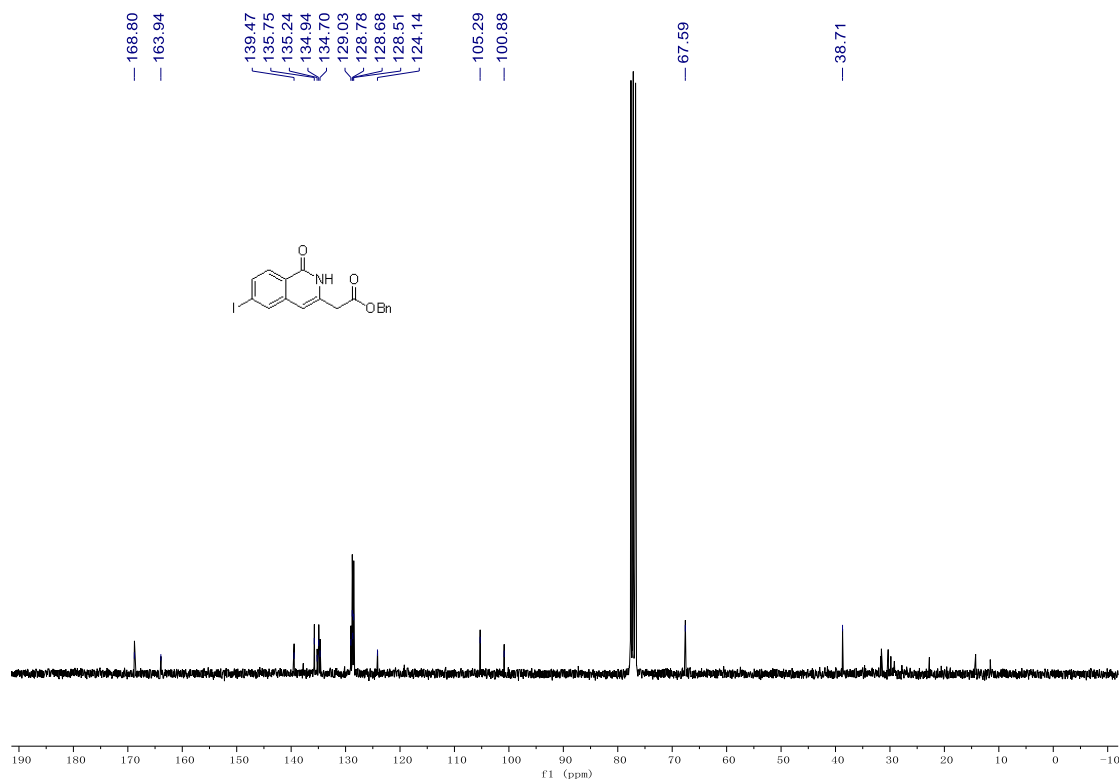

### <sup>1</sup>H NMR (300 MHz, CDCl<sub>3</sub>) Spectra of compound 3ia

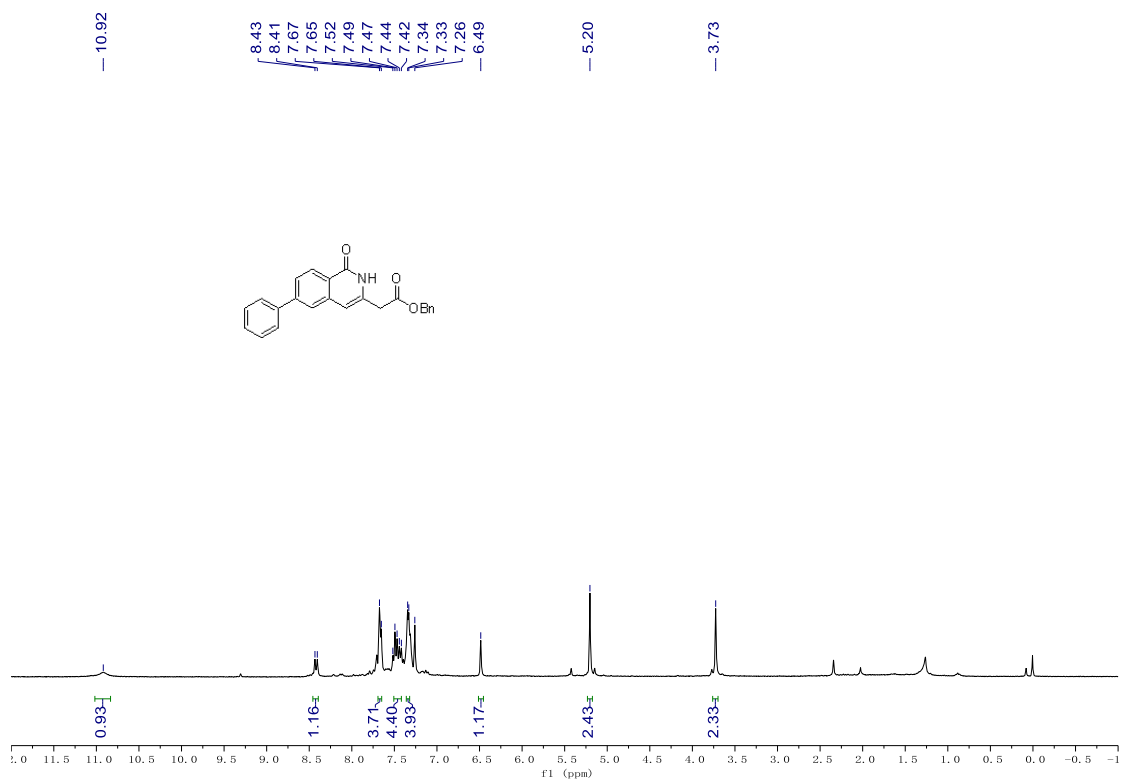

### <sup>13</sup>C NMR (126 MHz, DMSO-*d*<sub>6</sub>) Spectra of compound 3ia

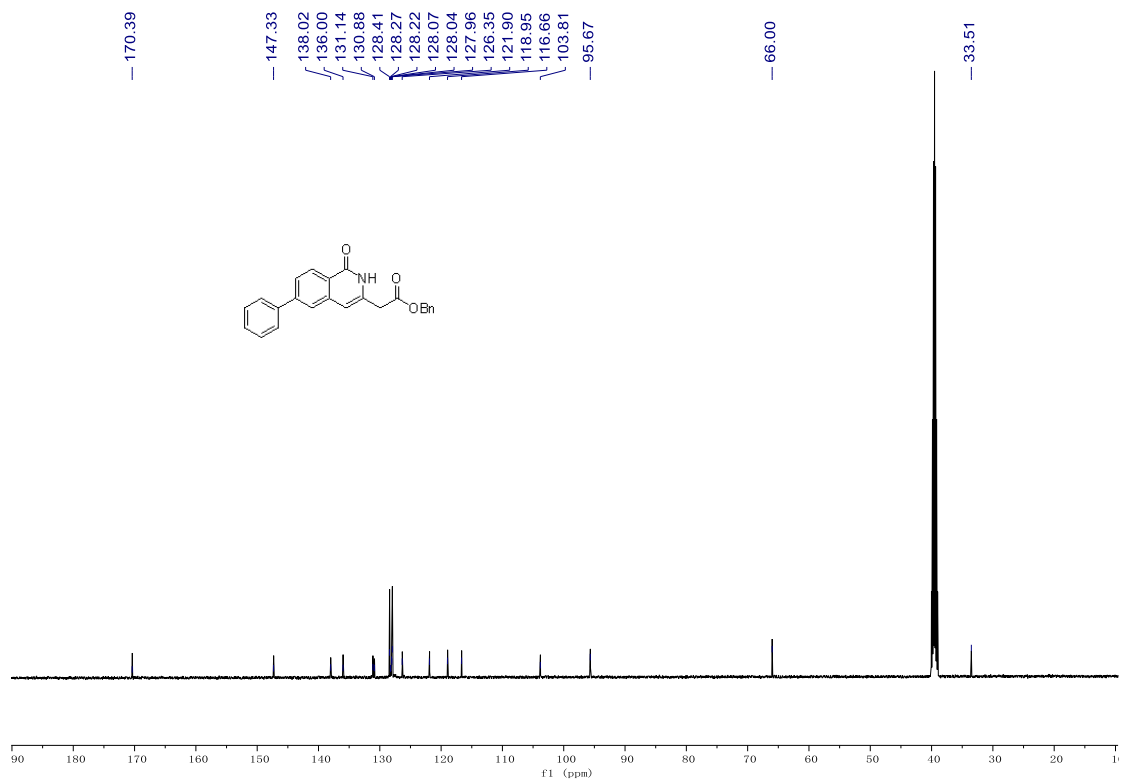

# <sup>1</sup>H NMR (300 MHz, DMSO-*d*<sub>6</sub>) Spectra of compound 3ja

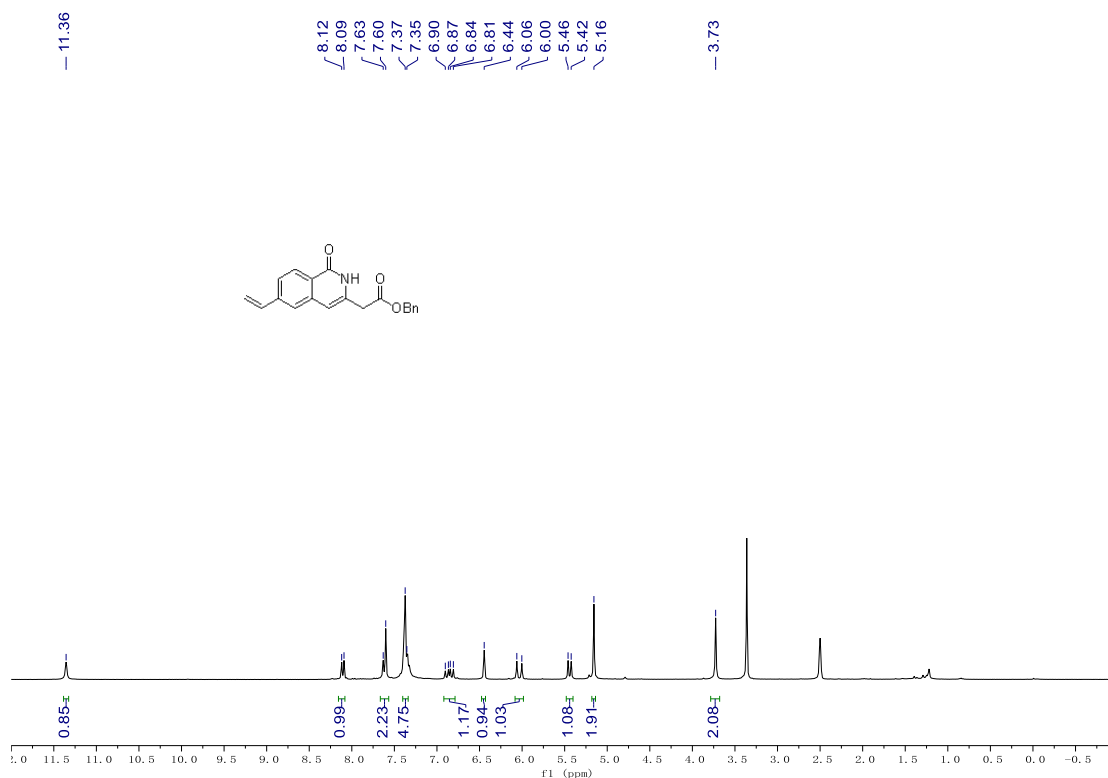

# <sup>13</sup>C NMR (75 MHz, DMSO-*d*<sub>6</sub>) Spectra of compound 3ja

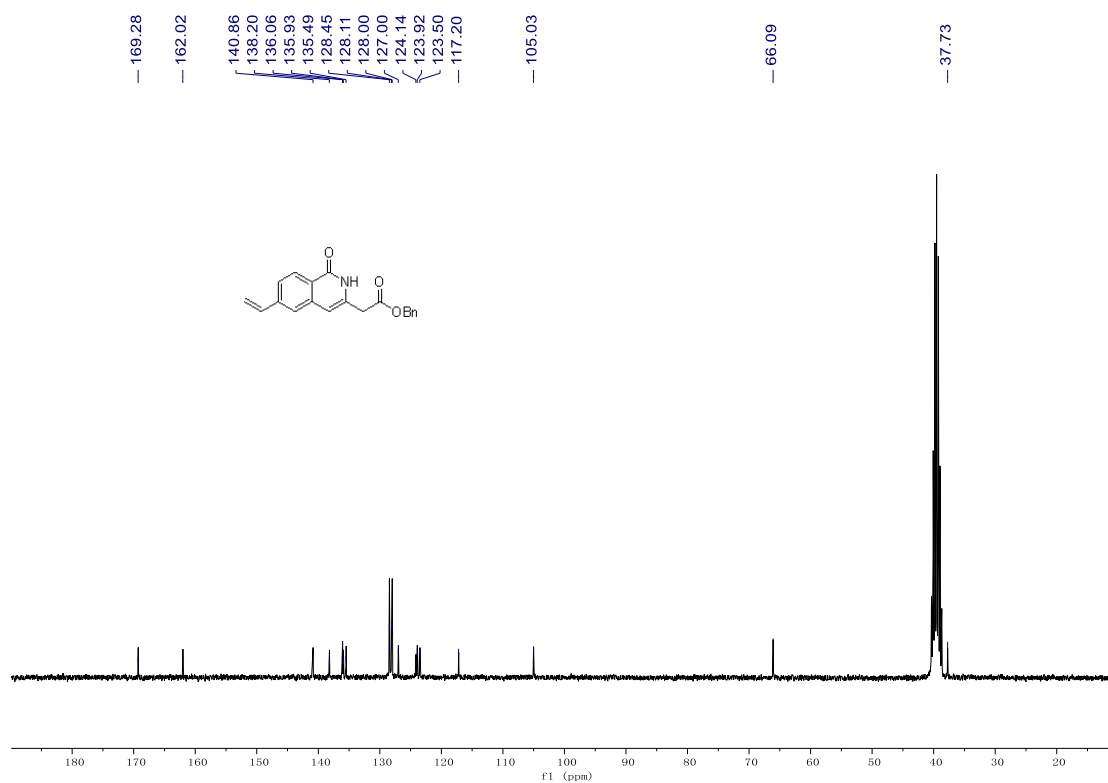



### <sup>1</sup>H NMR (300 MHz, CDCl<sub>3</sub>) Spectra of compound 3ka

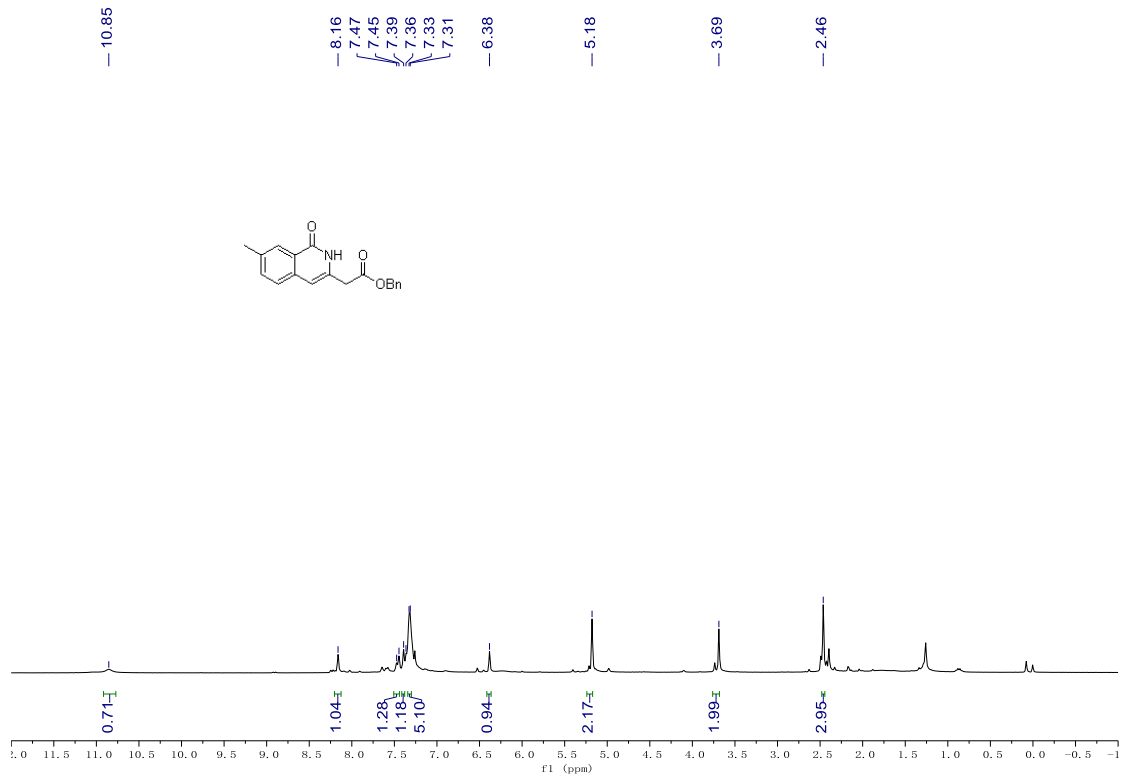

### <sup>13</sup>C NMR (126 MHz, DMSO-*d*<sub>6</sub>) Spectra of compound 3ka

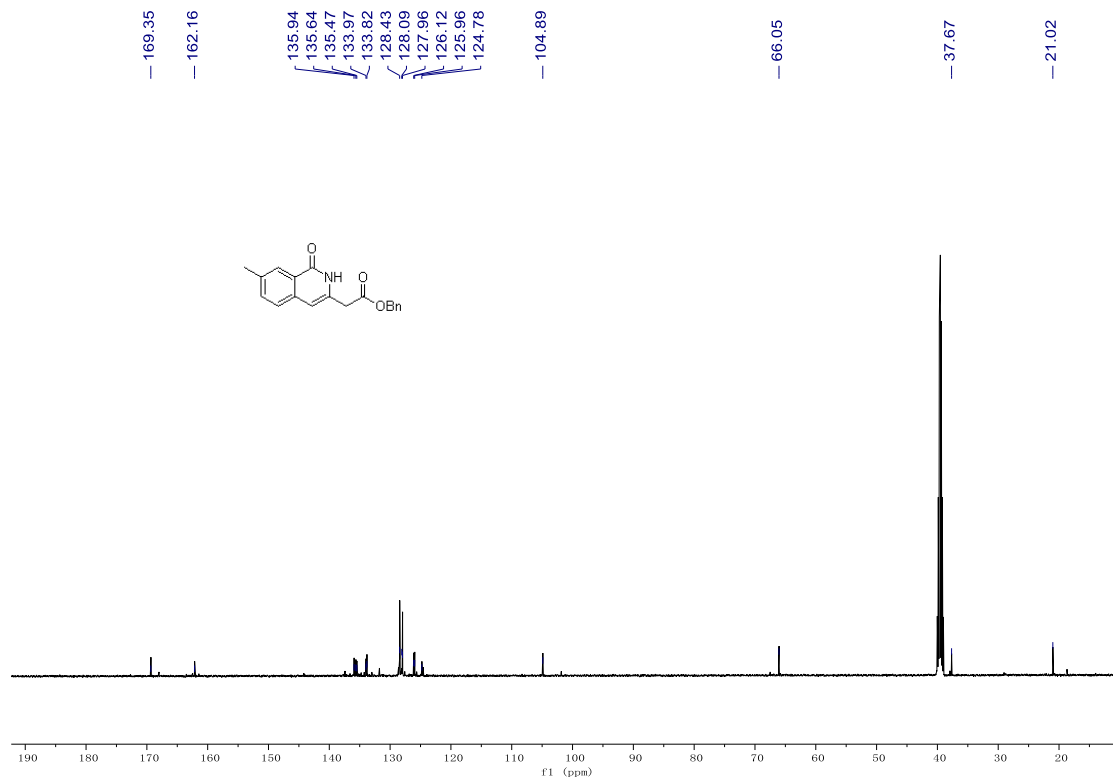

### <sup>1</sup>H NMR (400 MHz, CDCl<sub>3</sub>) Spectra of compound 3la

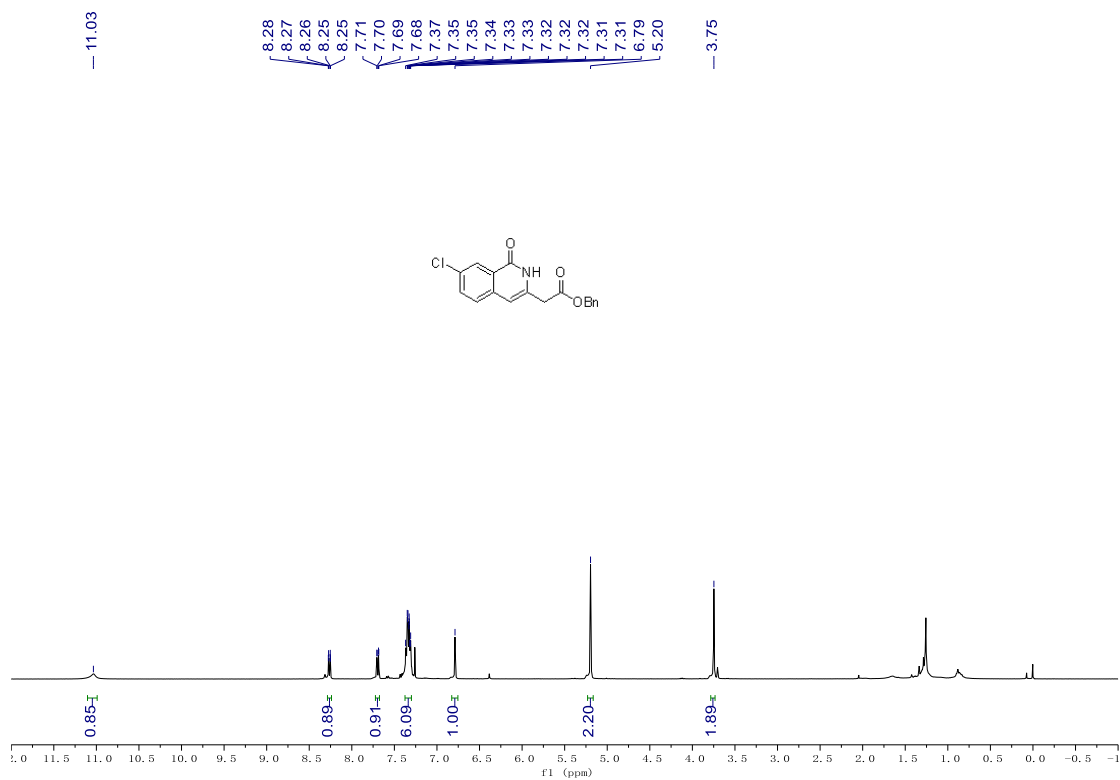

### <sup>13</sup>C NMR (75 MHz, DMSO-*d*<sub>6</sub>) Spectra of compound 3la

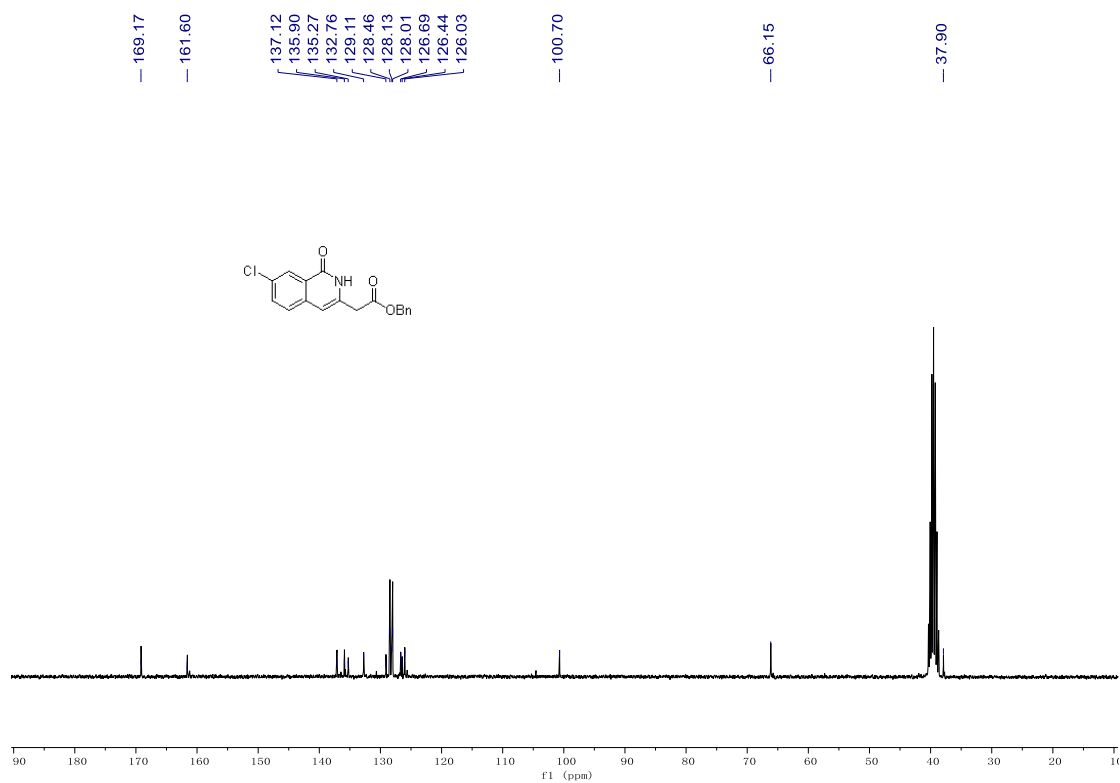

### <sup>1</sup>H NMR (500 MHz, DMSO-*d*<sub>6</sub>) Spectra of compound 3ma

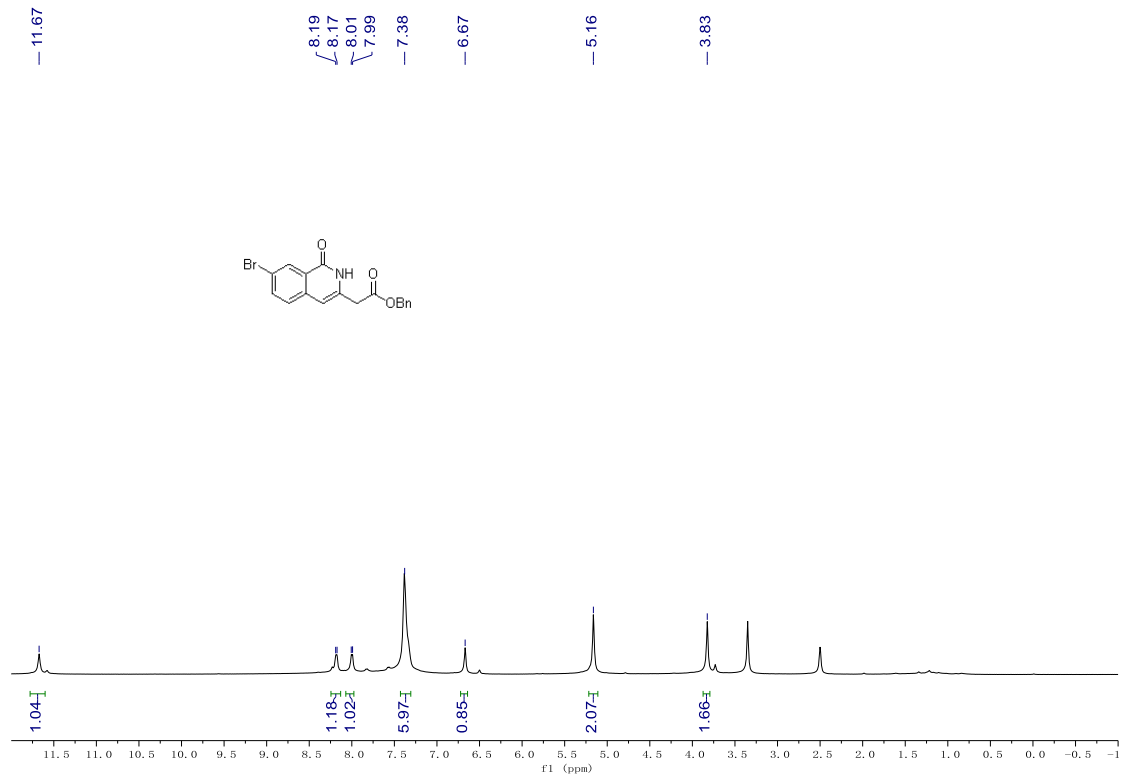

### <sup>13</sup>C NMR (126 MHz, DMSO-*d*<sub>6</sub>) Spectra of compound 3ma

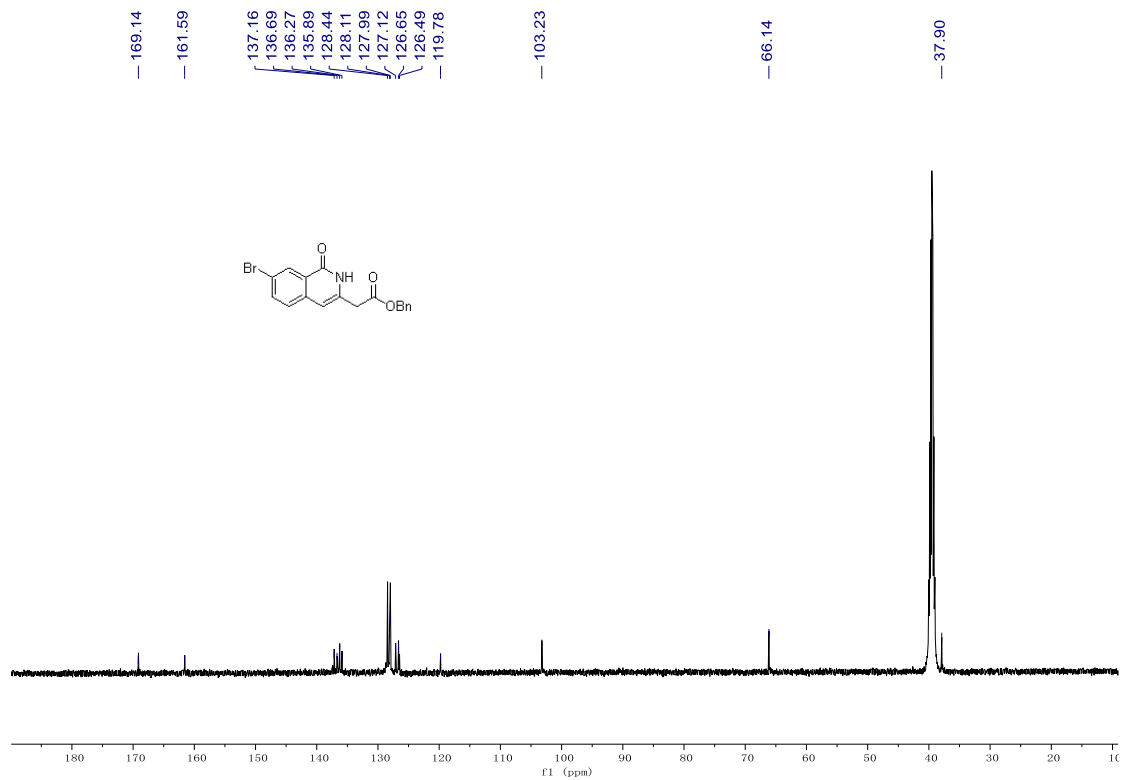

# <sup>1</sup>H NMR (400 MHz, CDCl<sub>3</sub>) Spectra of compound 3na

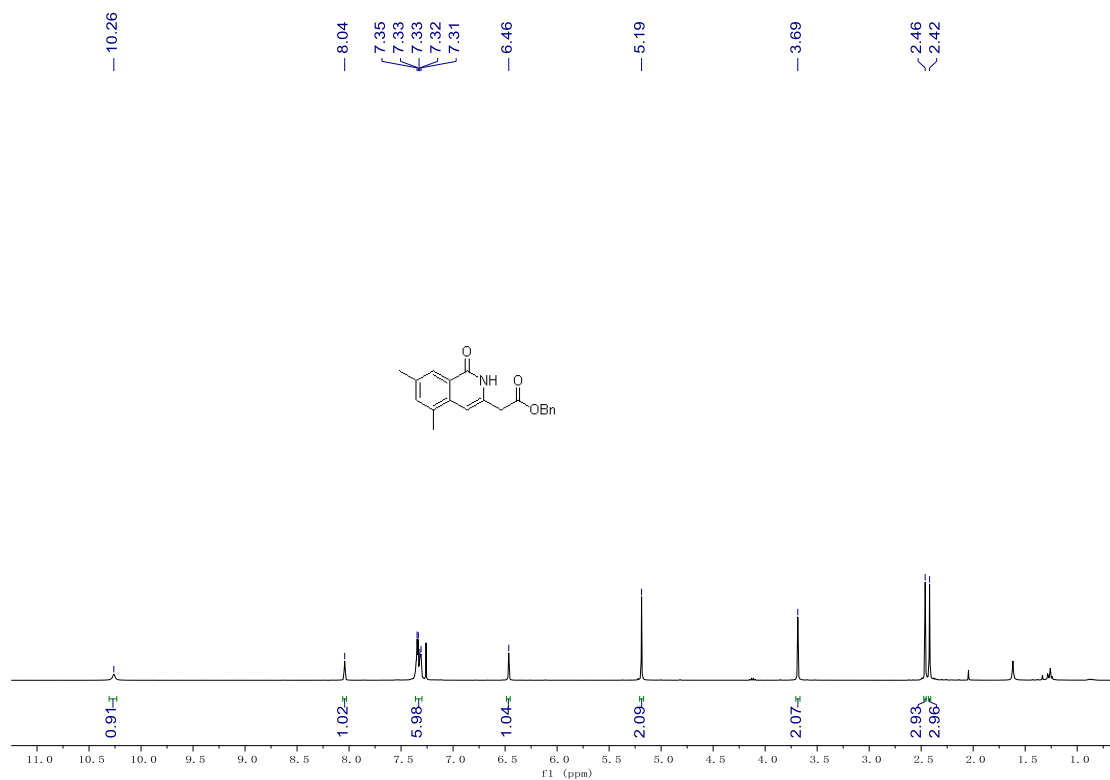

# <sup>13</sup>C NMR (75 MHz, DMSO-d<sub>6</sub>) Spectra of compound 3na

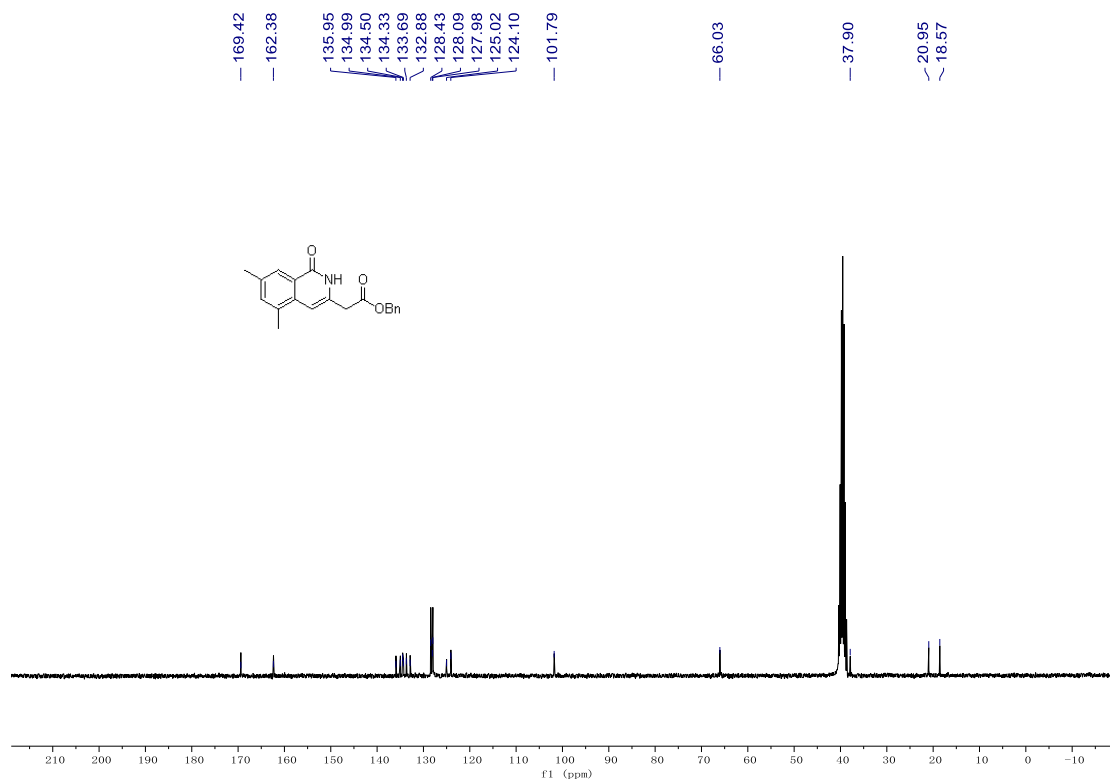

### <sup>1</sup>H NMR (500 MHz, DMSO-*d*<sub>6</sub>) Spectra of compound 30a

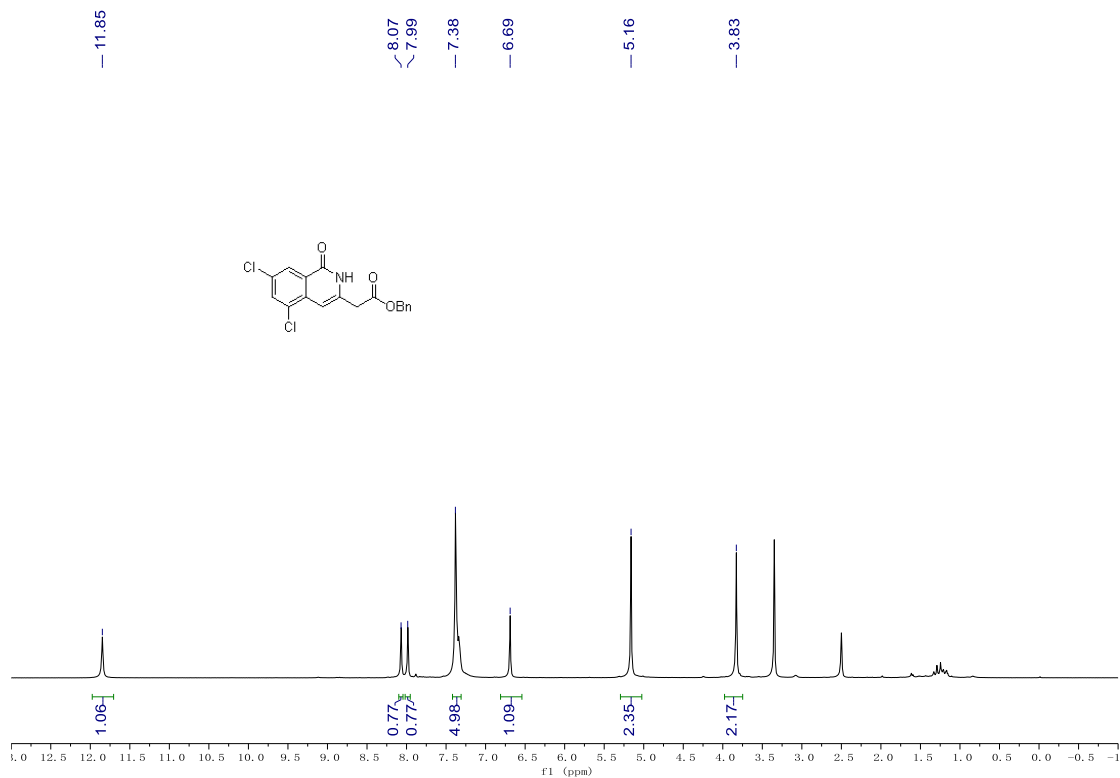

### <sup>13</sup>C NMR (126 MHz, DMSO-*d*<sub>6</sub>) Spectra of compound 30a

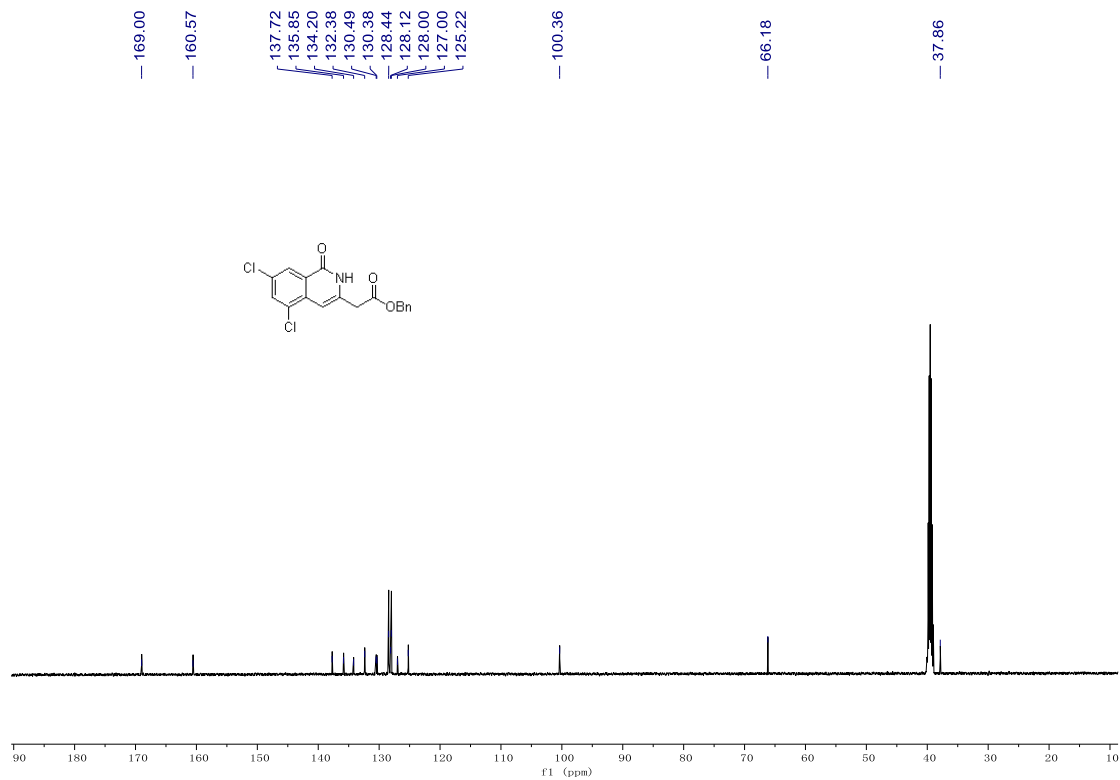

### <sup>1</sup>H NMR (500 MHz, DMSO-*d*<sub>6</sub>) Spectra of compound 3pa

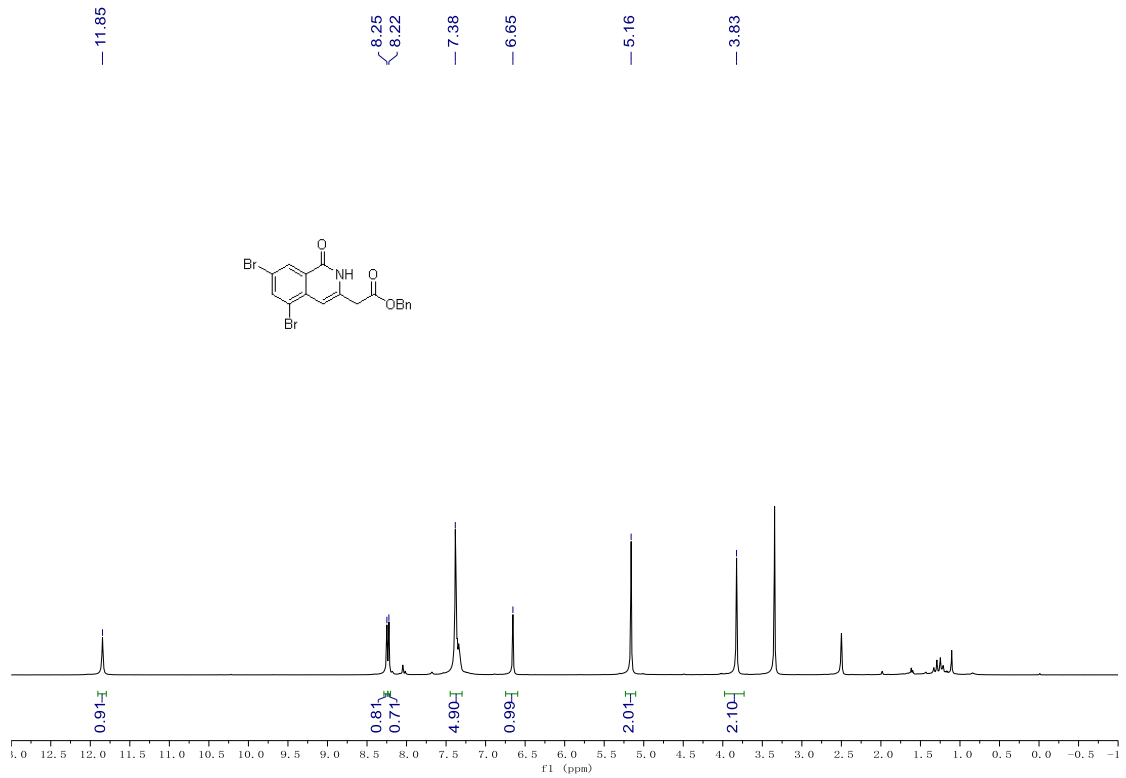

### <sup>13</sup>C NMR (126 MHz, DMSO-*d*<sub>6</sub>) Spectra of compound 3pa

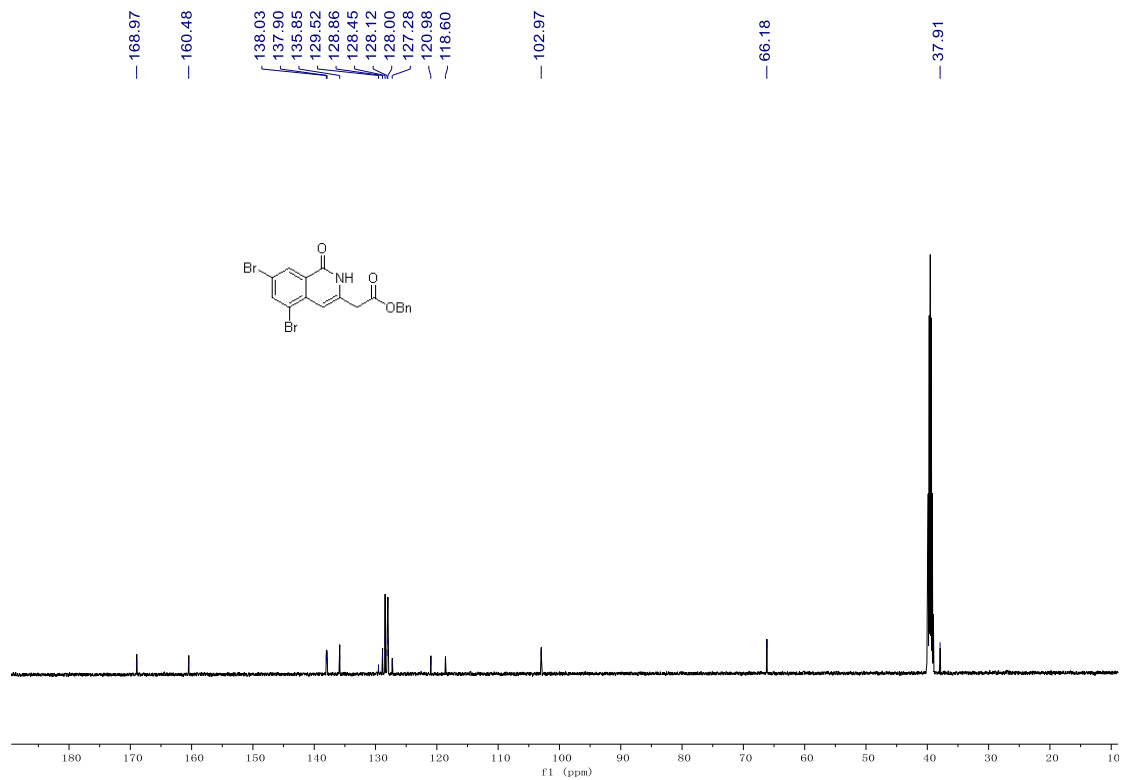

### <sup>1</sup>H NMR (300 MHz, DMSO-*d*<sub>6</sub>) Spectra of compound 3qa

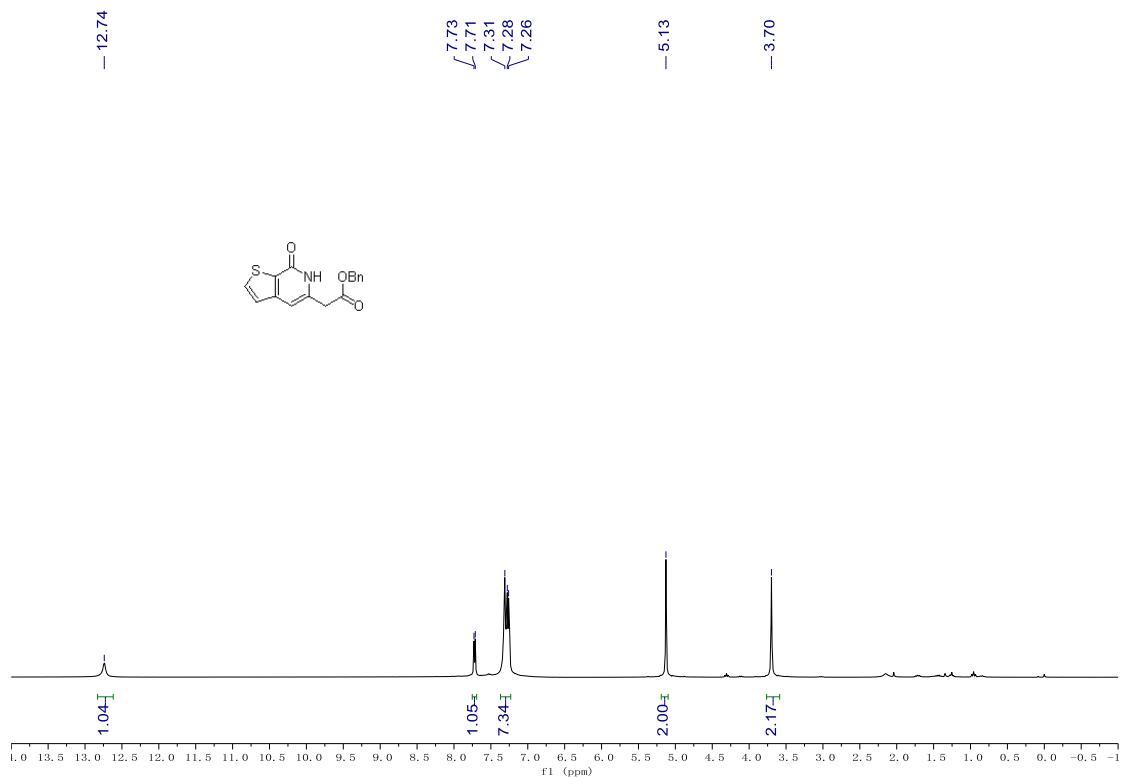

### <sup>13</sup>C NMR (75 MHz, DMSO-*d*<sub>6</sub>) Spectra of compound 3qa

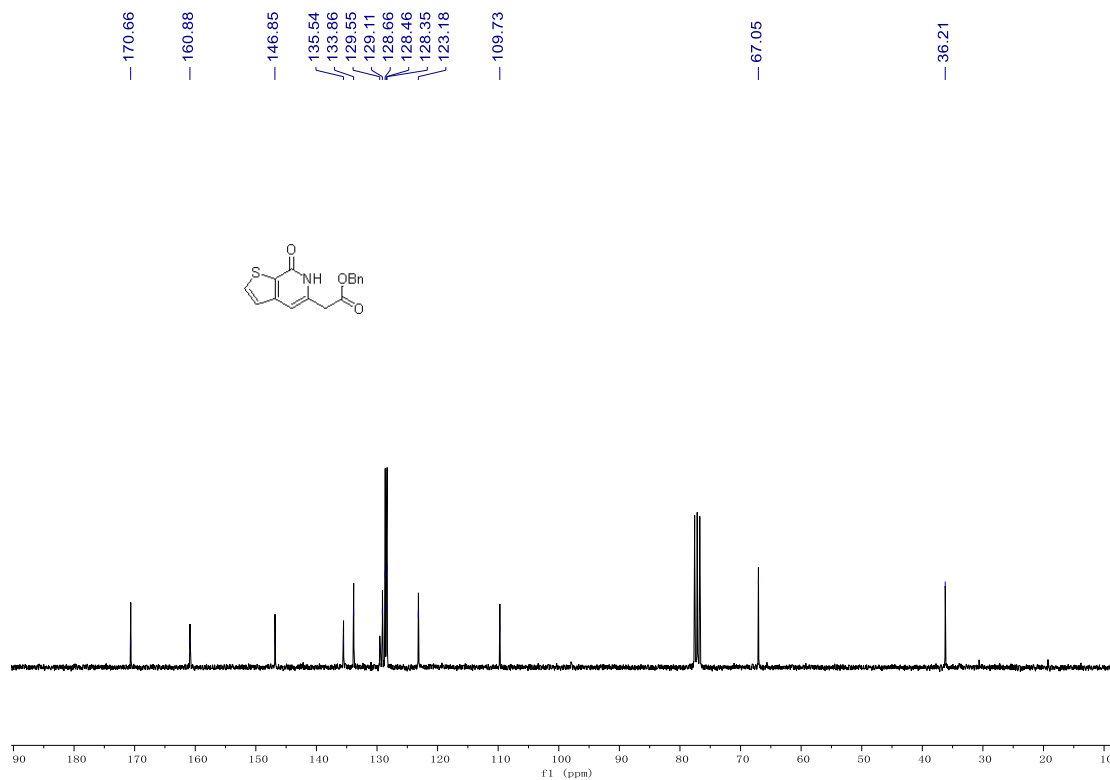

### <sup>1</sup>H NMR (300 MHz, DMSO-*d*<sub>6</sub>) Spectra of compound 3ra

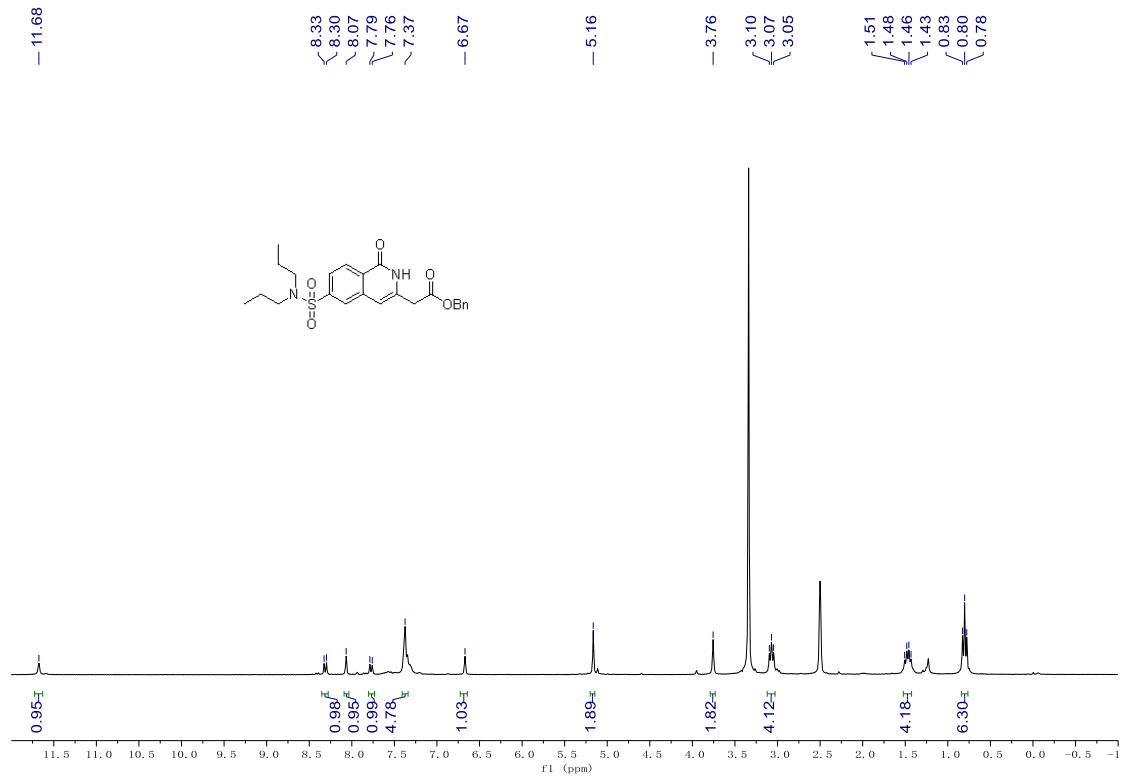

### <sup>13</sup>C NMR (75 MHz, DMSO-*d*<sub>6</sub>) Spectra of compound 3ra

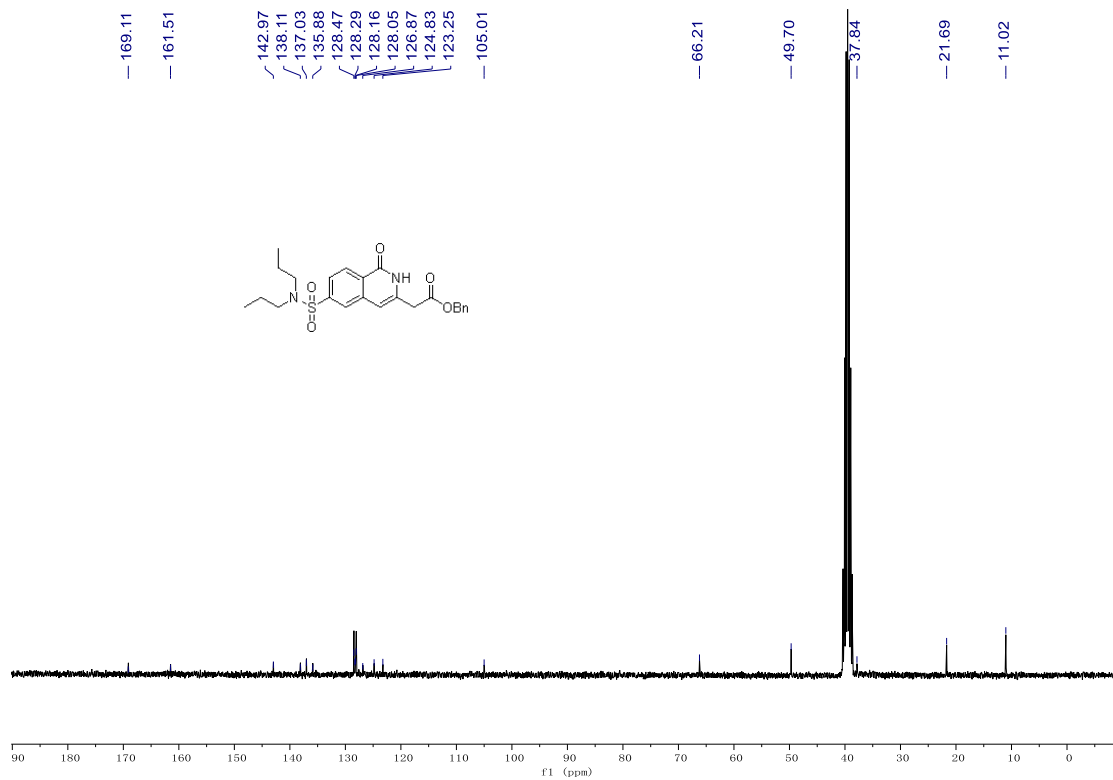



# <sup>1</sup>H NMR (500 MHz, DMSO-d<sub>6</sub>) Spectra of compound 3ab

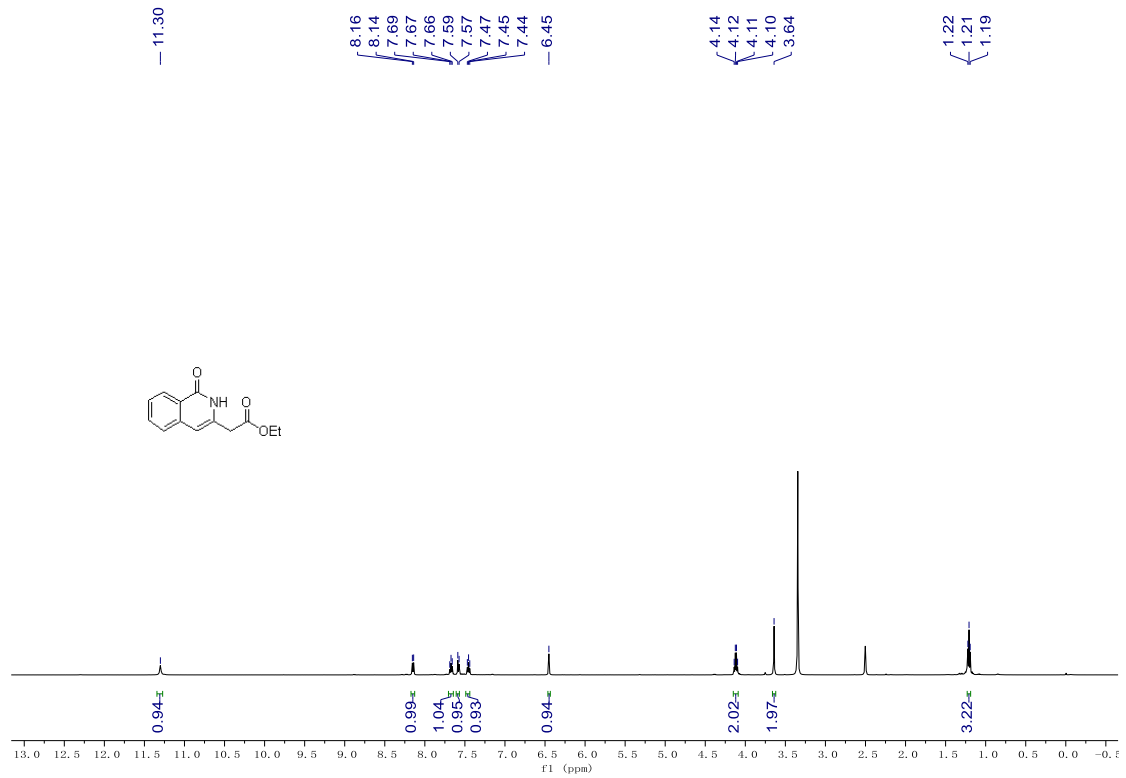

# <sup>13</sup>C NMR (126 MHz, DMSO-d<sub>6</sub>) Spectra of compound 3ab

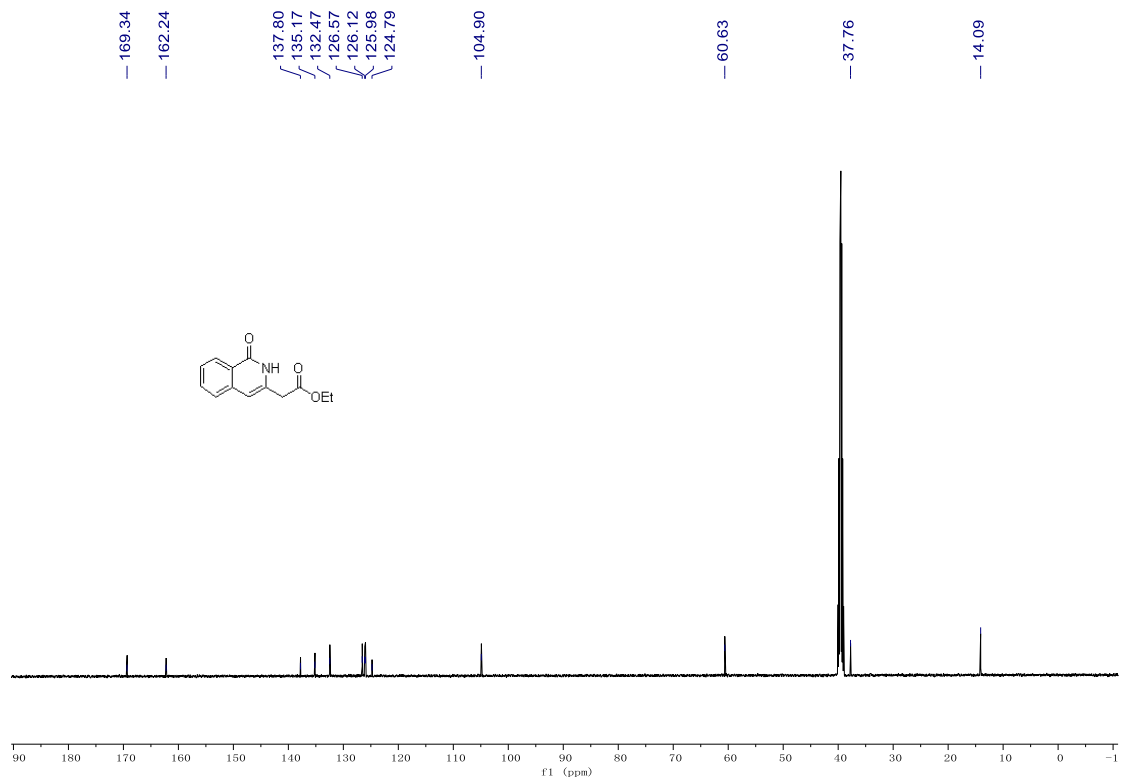

# <sup>1</sup>H NMR (400 MHz, CDCl<sub>3</sub>) Spectra of compound 3ac

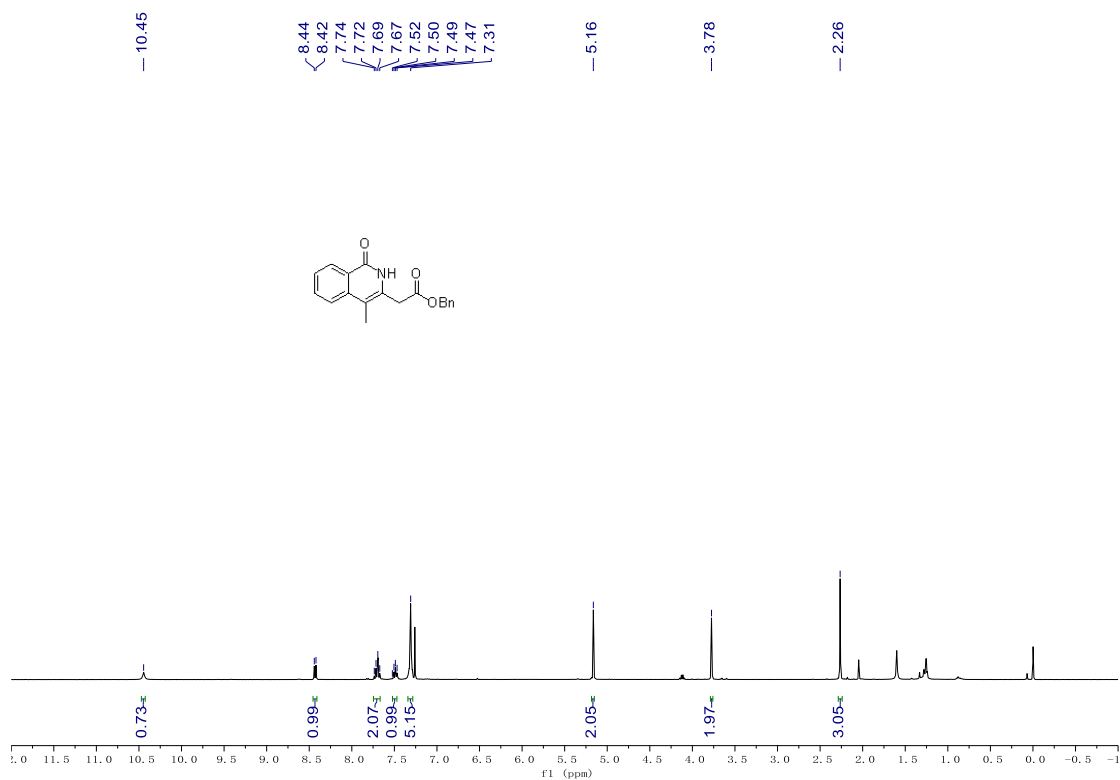

# <sup>13</sup>C NMR (75 MHz, DMSO-d<sub>6</sub>) Spectra of compound 3ac

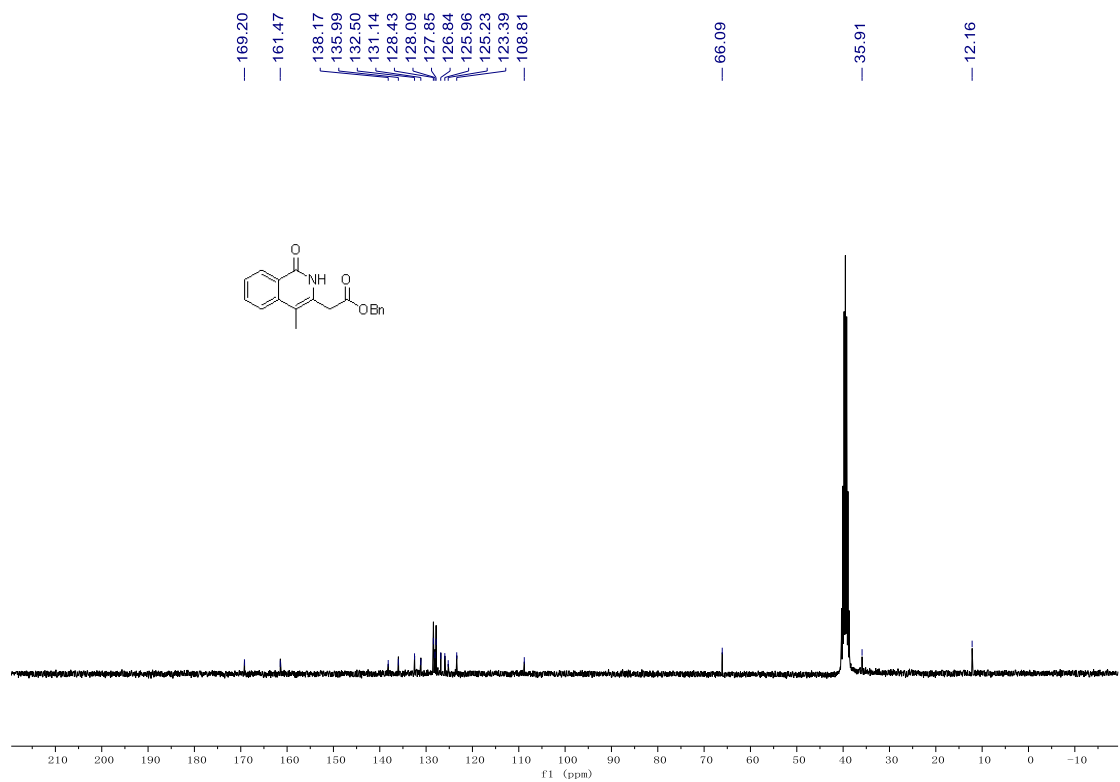

# <sup>1</sup>H NMR (300 MHz, CDCl<sub>3</sub>) Spectra of compound 3ad

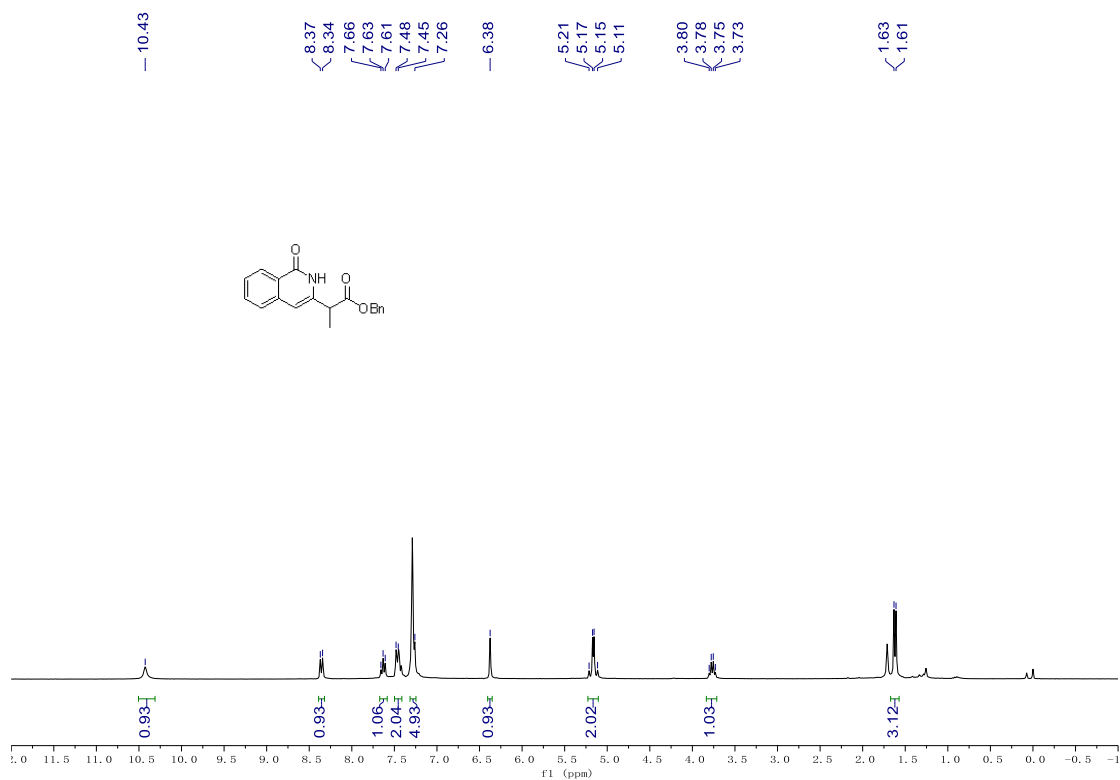

# <sup>13</sup>C NMR (75 MHz, CDCl<sub>3</sub>) Spectra of compound 3ad

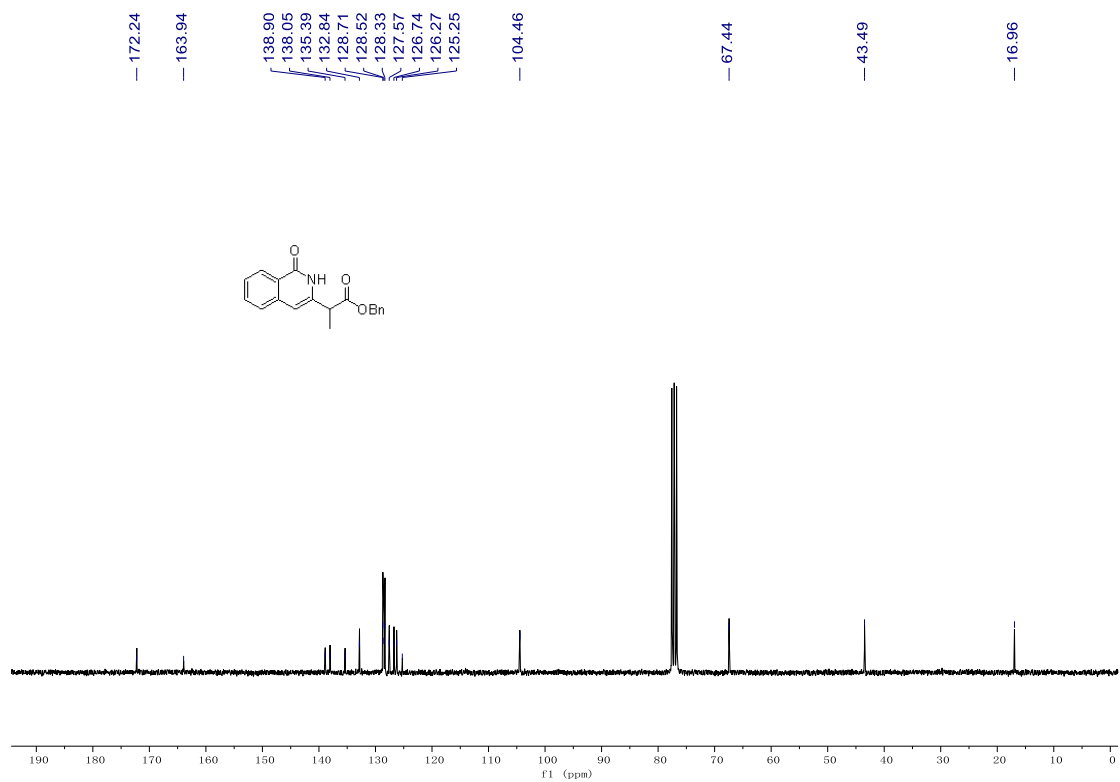



### <sup>1</sup>H NMR (300 MHz, DMSO-d<sub>6</sub>) Spectra of compound 3af

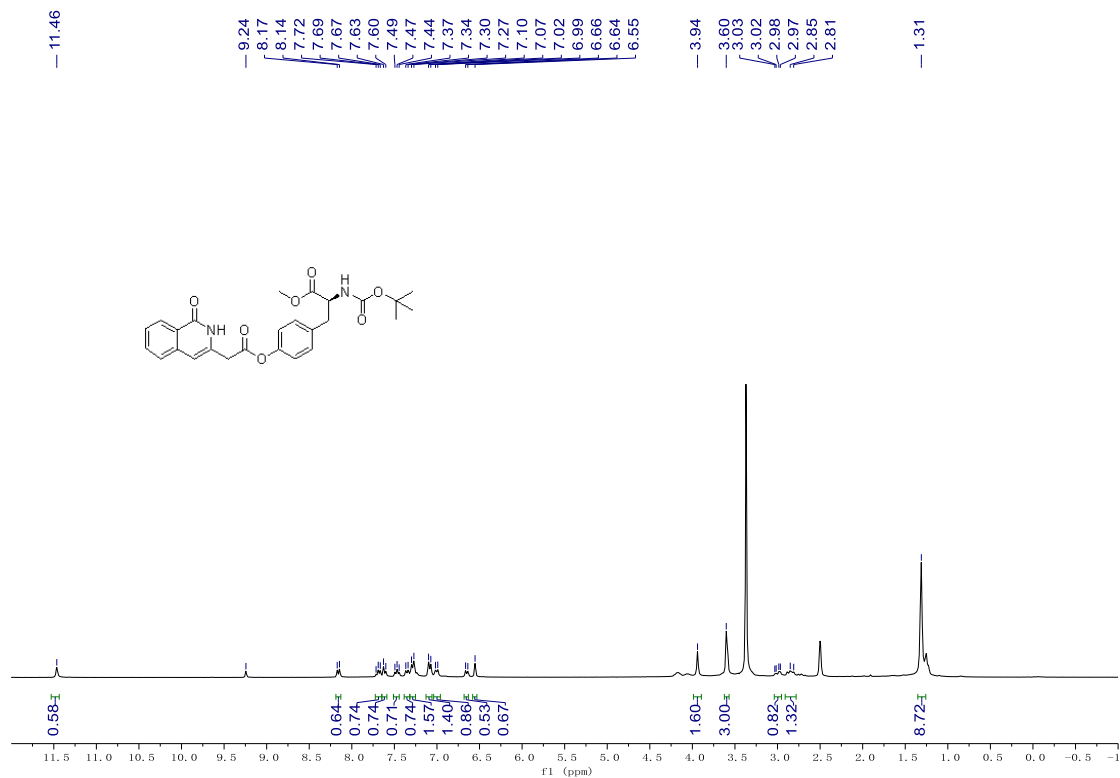

### <sup>13</sup>C NMR (126 MHz, DMSO-d<sub>6</sub>) Spectra of compound 3af

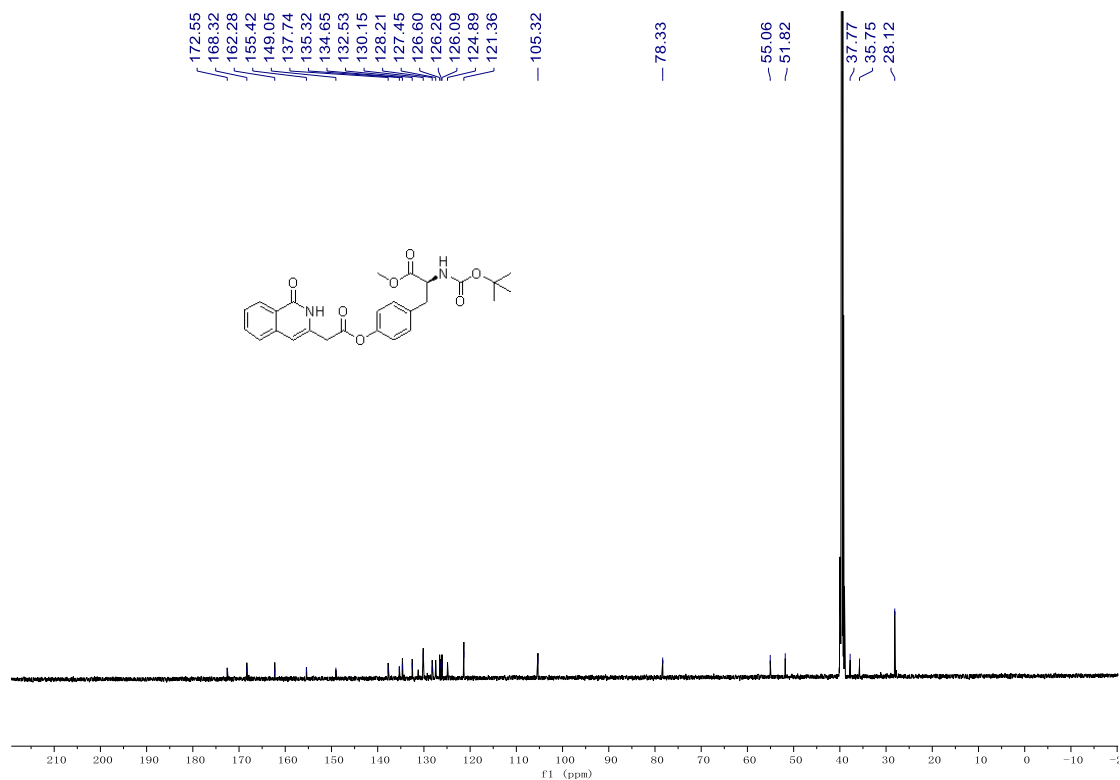

# <sup>1</sup>H NMR (300 MHz, CDCl<sub>3</sub>) Spectra of compound 3ag.

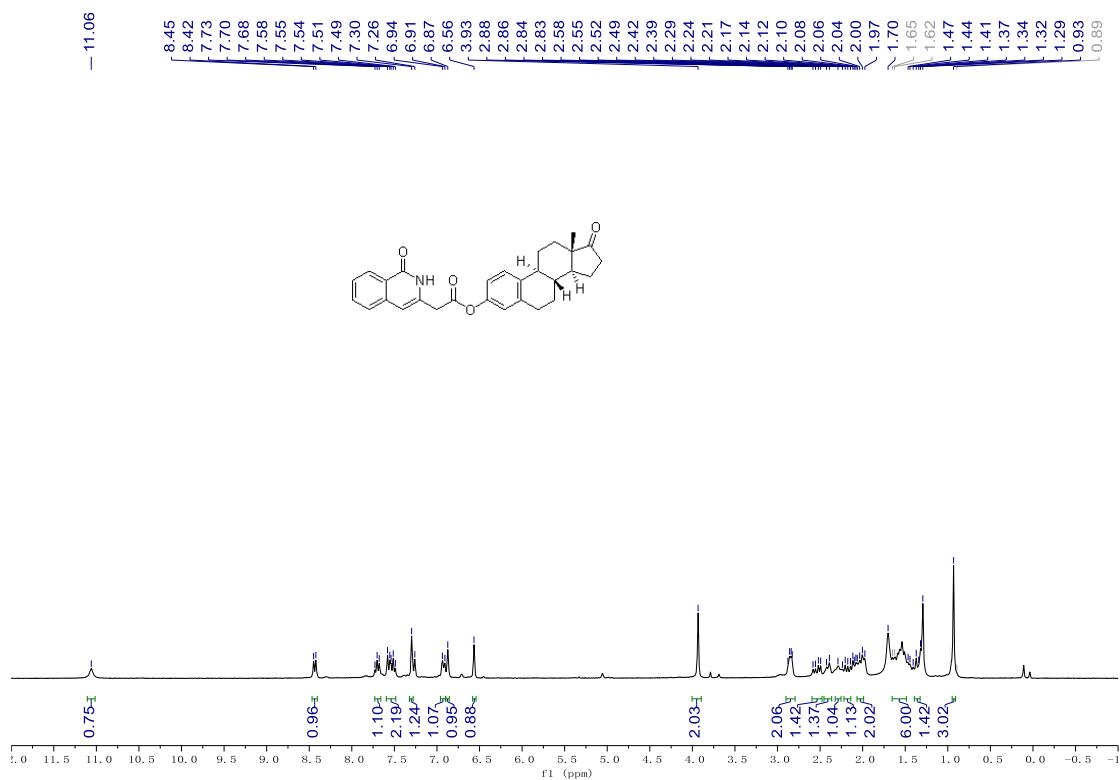

# <sup>13</sup>C NMR (75 MHz, CDCl<sub>3</sub>) Spectra of compound 3ag

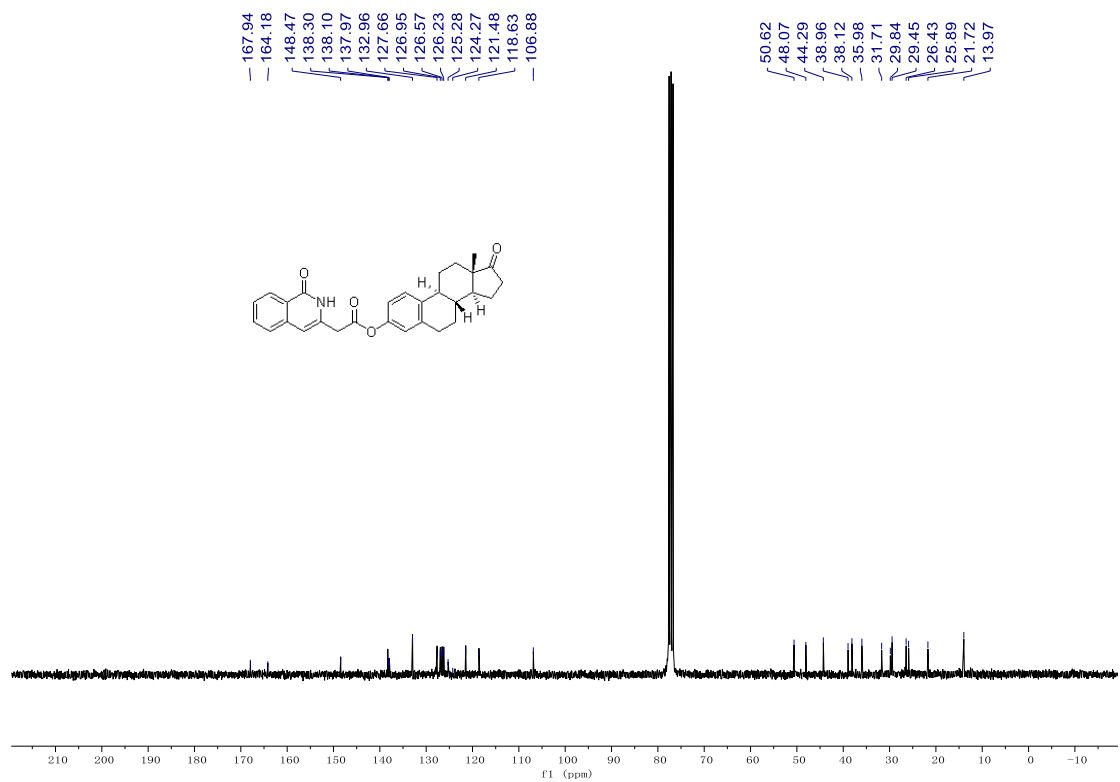

# <sup>1</sup>H NMR (300 MHz, CDCl<sub>3</sub>) Spectra of compound 3ah

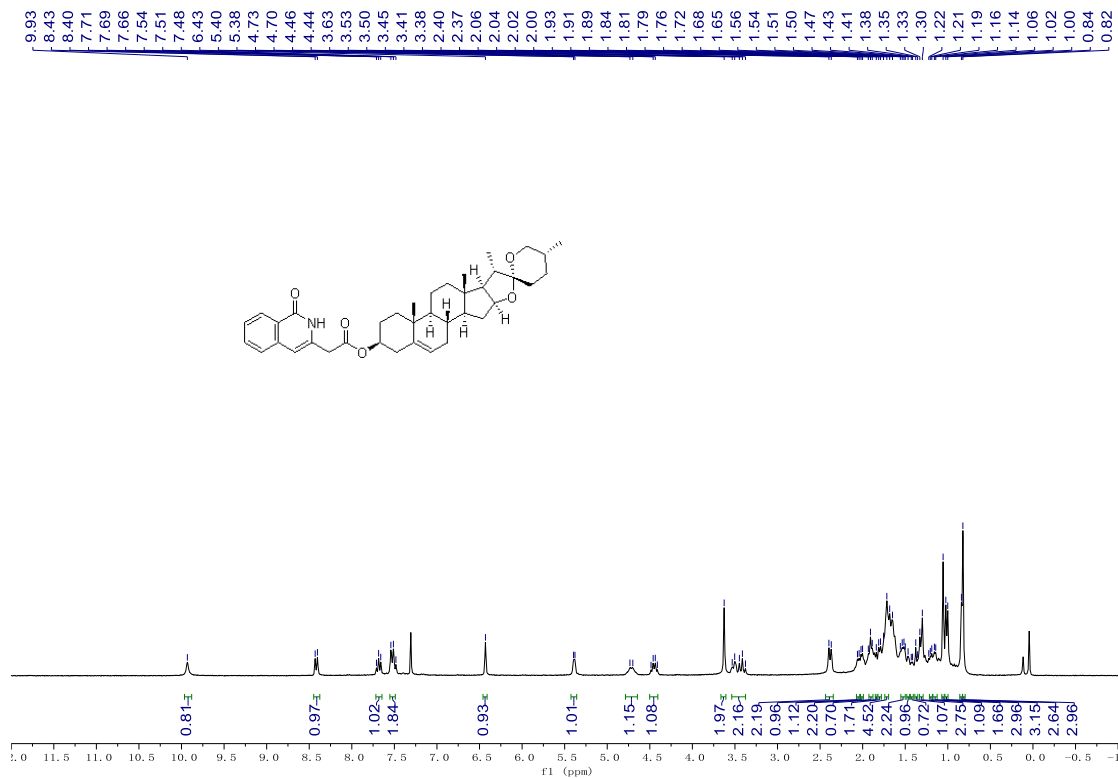

# <sup>13</sup>C NMR (126 MHz, CDCl<sub>3</sub>) Spectra of compound 3ah

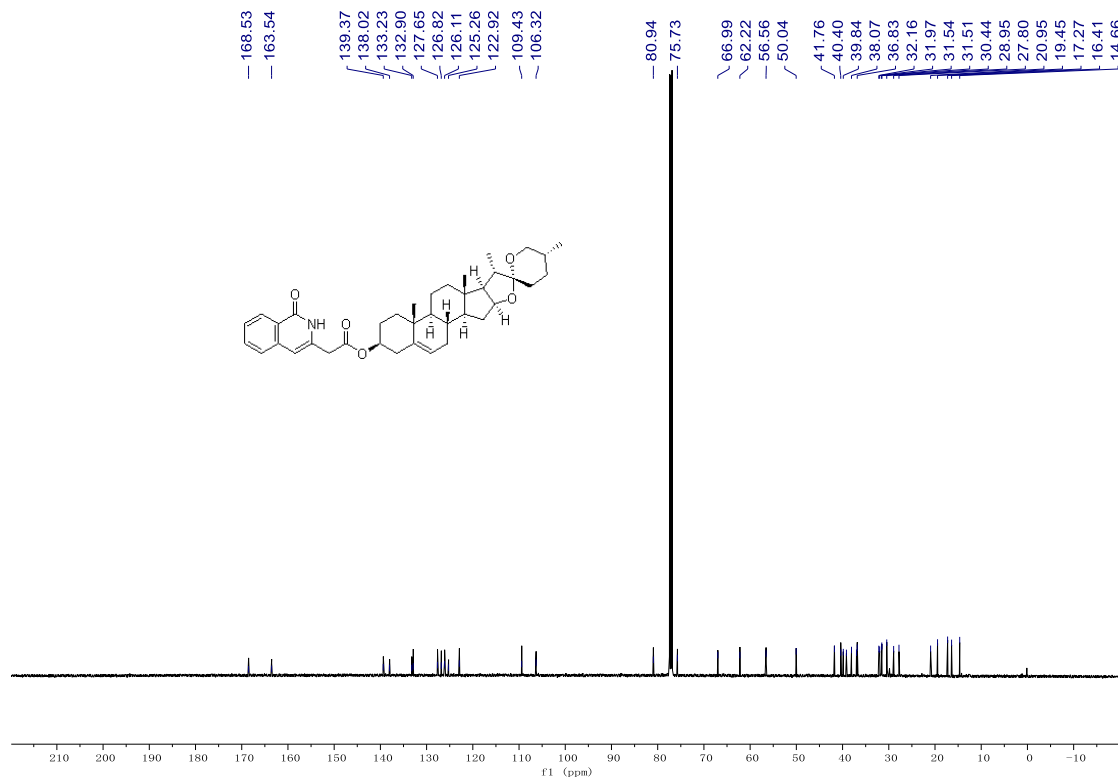

# <sup>1</sup>H NMR (300 MHz, CDCl<sub>3</sub>) Spectra of compound 5aa

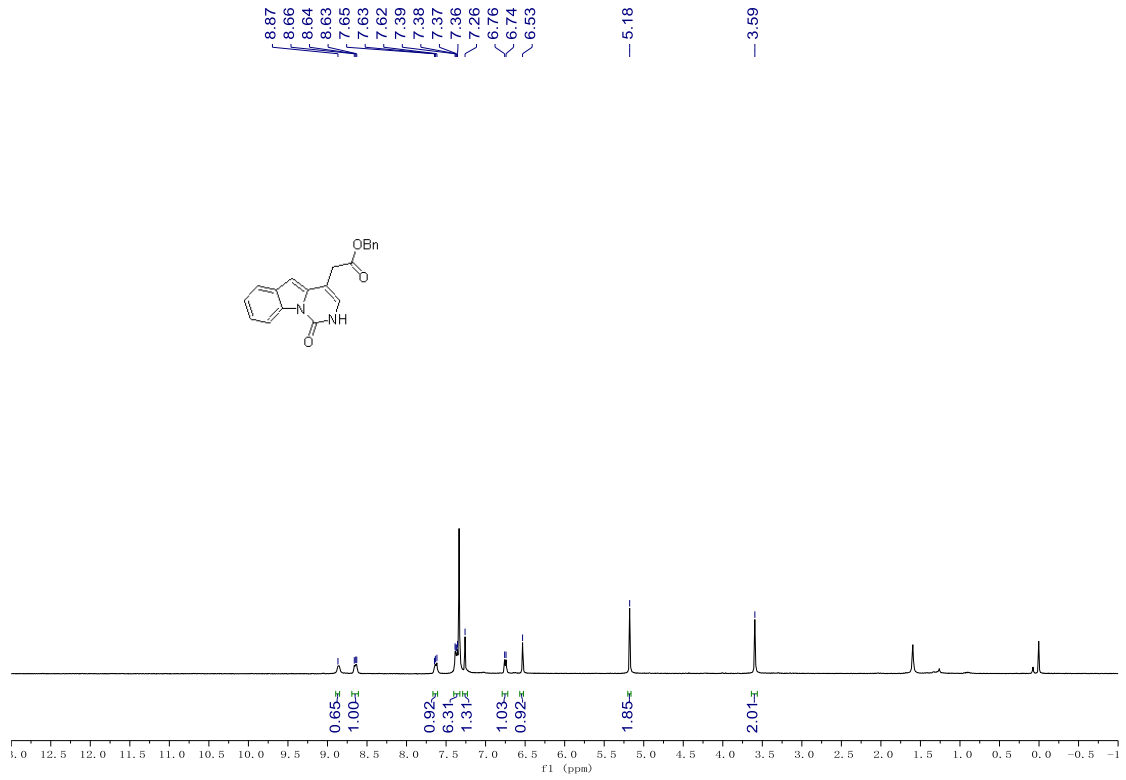

# <sup>13</sup>C NMR (126 MHz, CDCl<sub>3</sub>) Spectra of compound 5aa

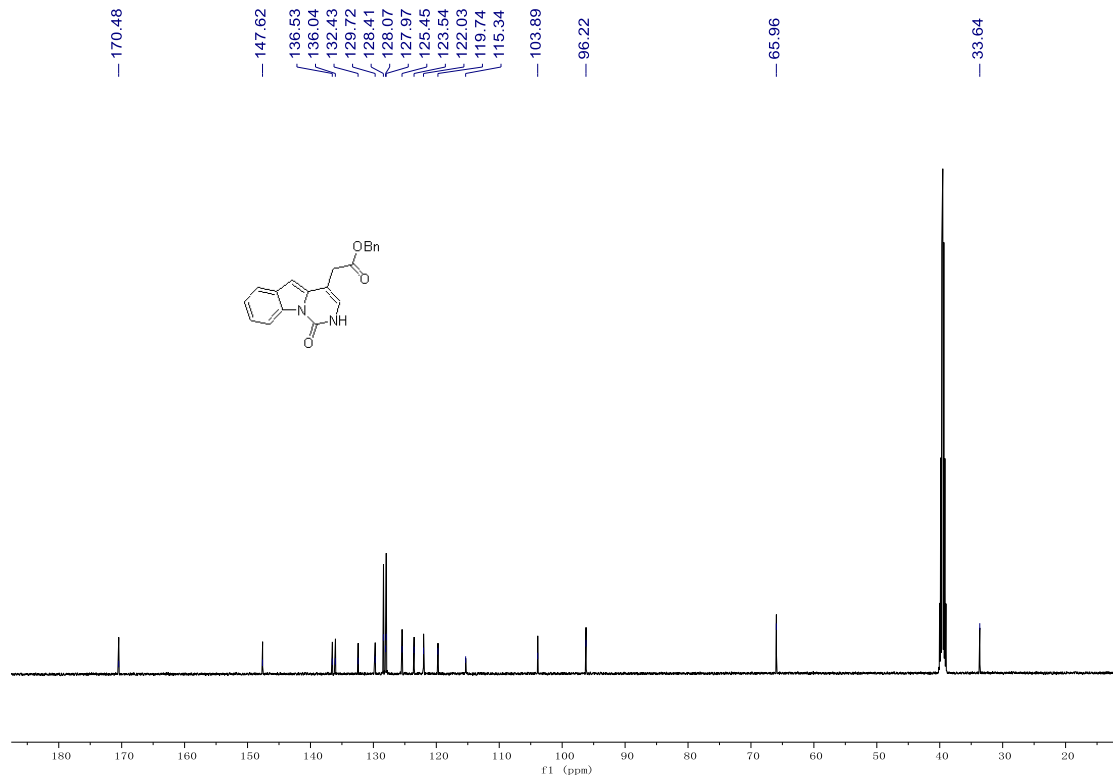



### <sup>1</sup>H NMR (400 MHz, DMSO-*d*<sub>6</sub>) Spectra of compound 5ba

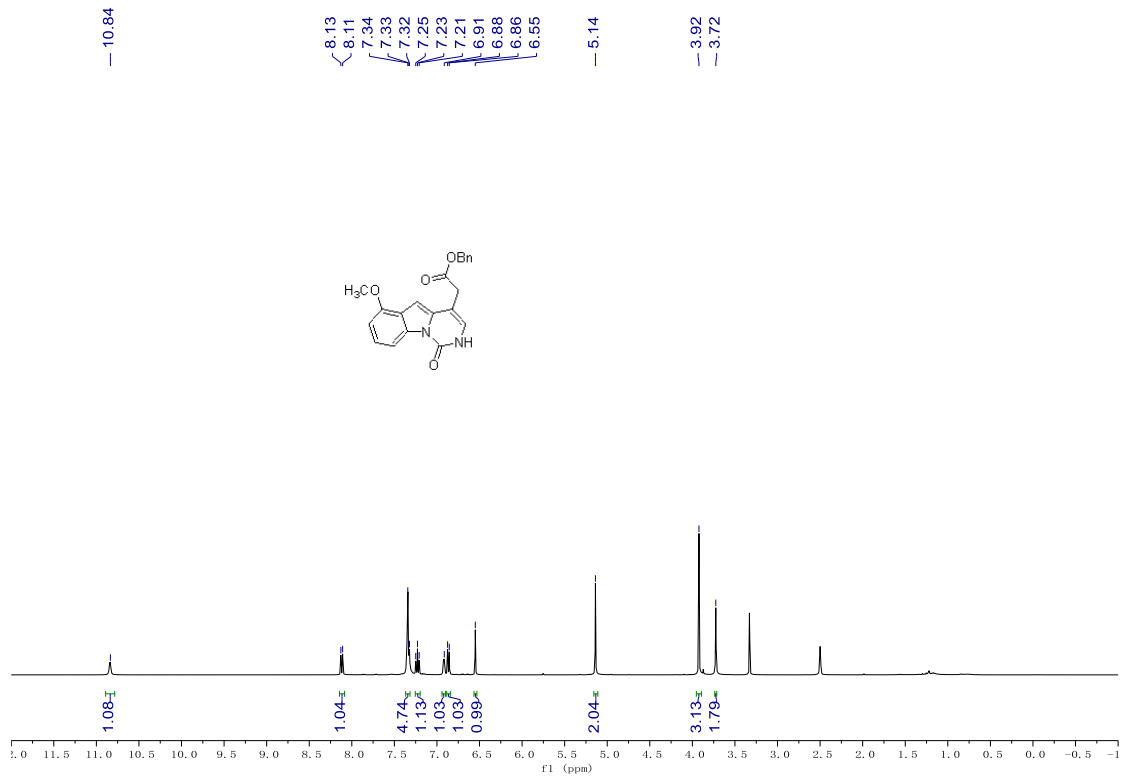

### <sup>13</sup>C NMR (75 MHz, DMSO-*d*<sub>6</sub>) Spectra of compound 5ba

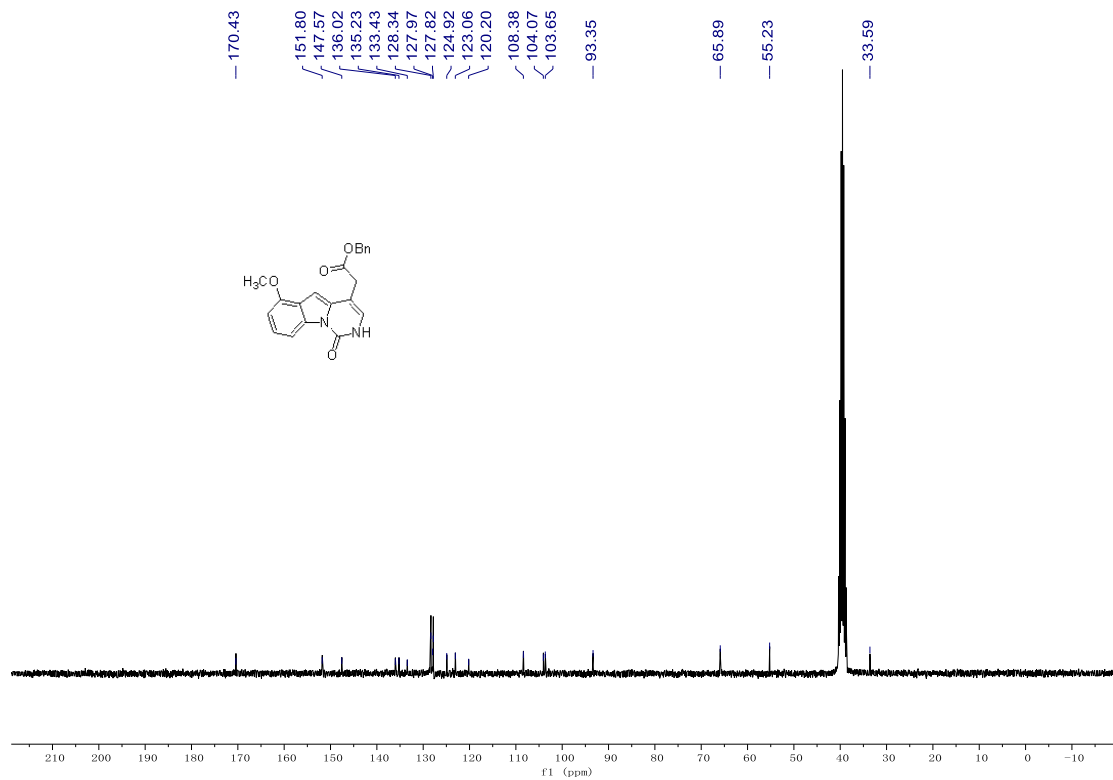

### <sup>1</sup>H NMR (400 MHz, DMSO-*d*<sub>6</sub>) Spectra of compound 5ca

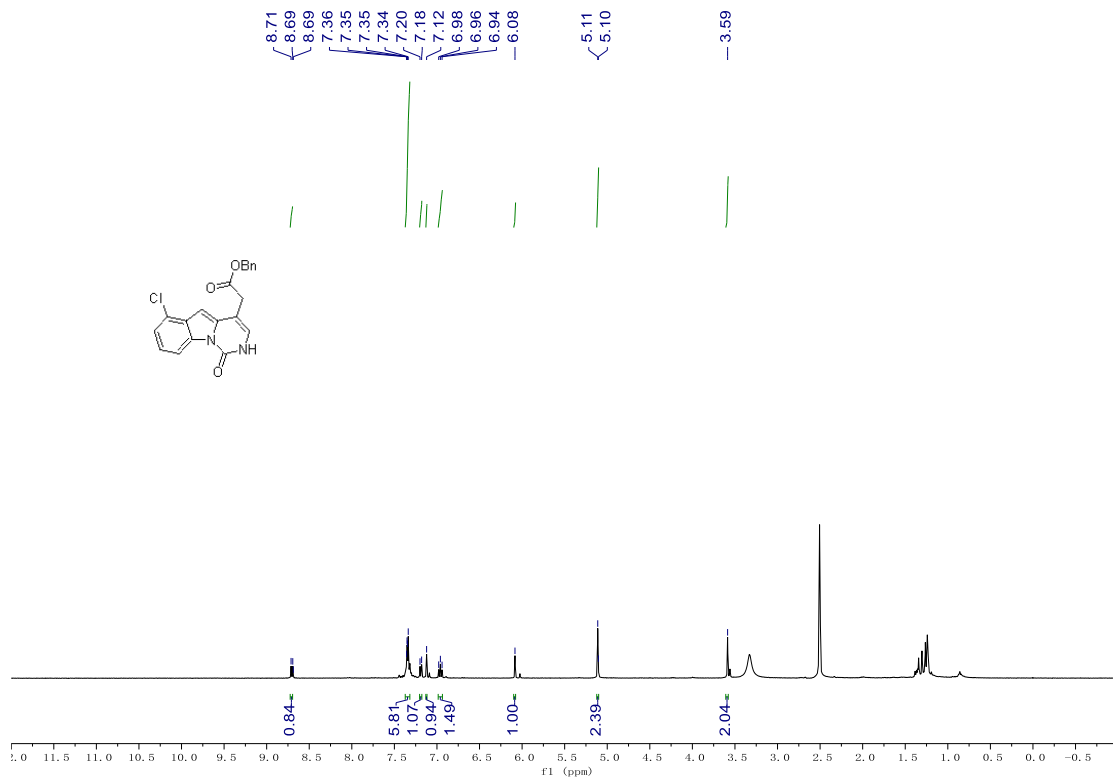

### <sup>13</sup>C NMR (75 MHz, DMSO-*d*<sub>6</sub>) Spectra of compound 5ca

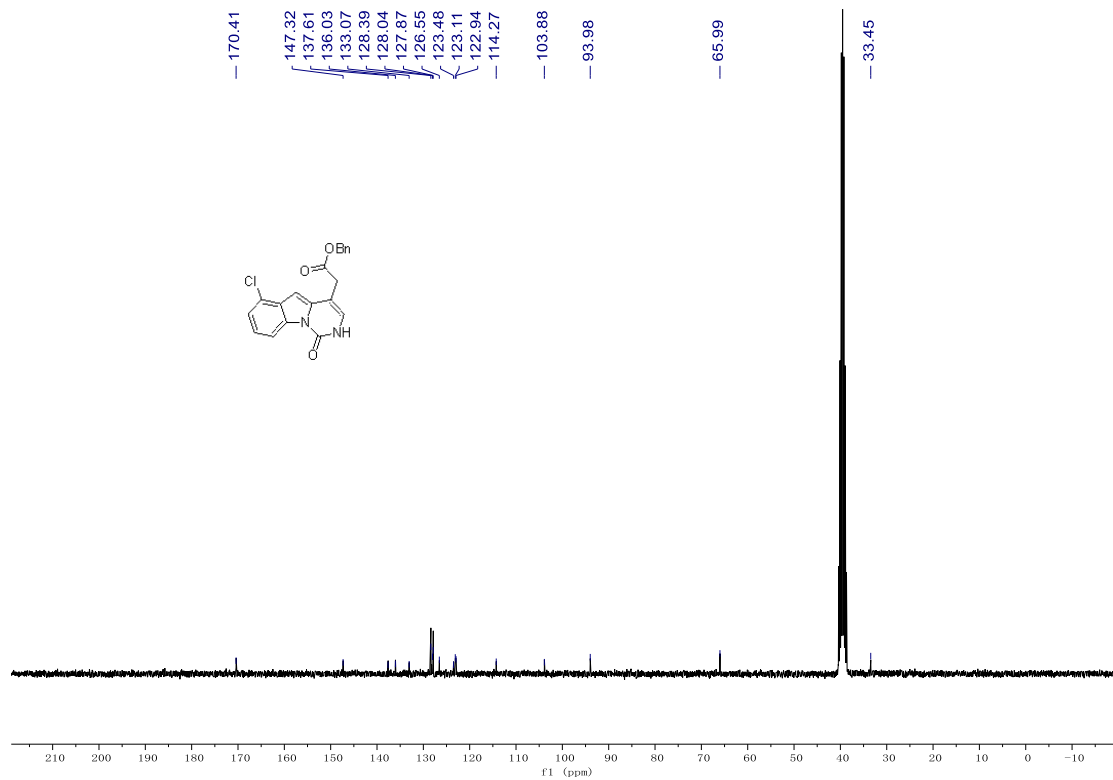

### <sup>1</sup>H NMR (300 MHz, DMSO-*d*<sub>6</sub>) Spectra of compound 5da

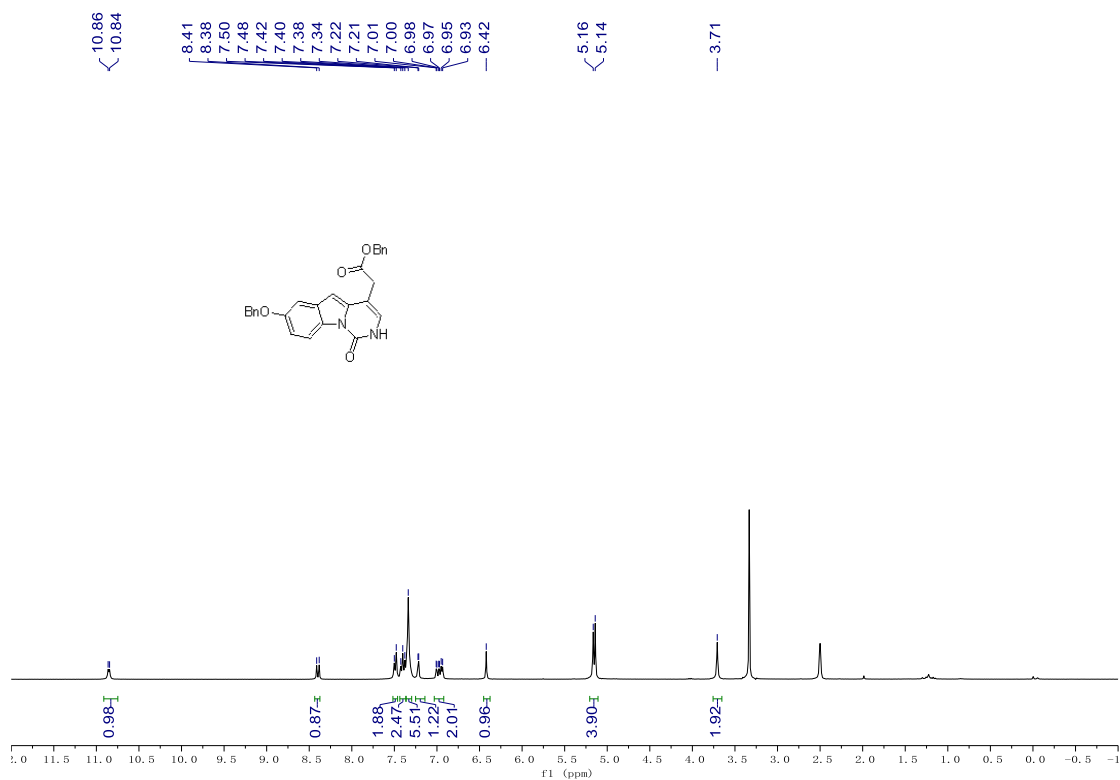

### <sup>13</sup>C NMR (75 MHz, DMSO-*d*<sub>6</sub>) Spectra of compound 5da

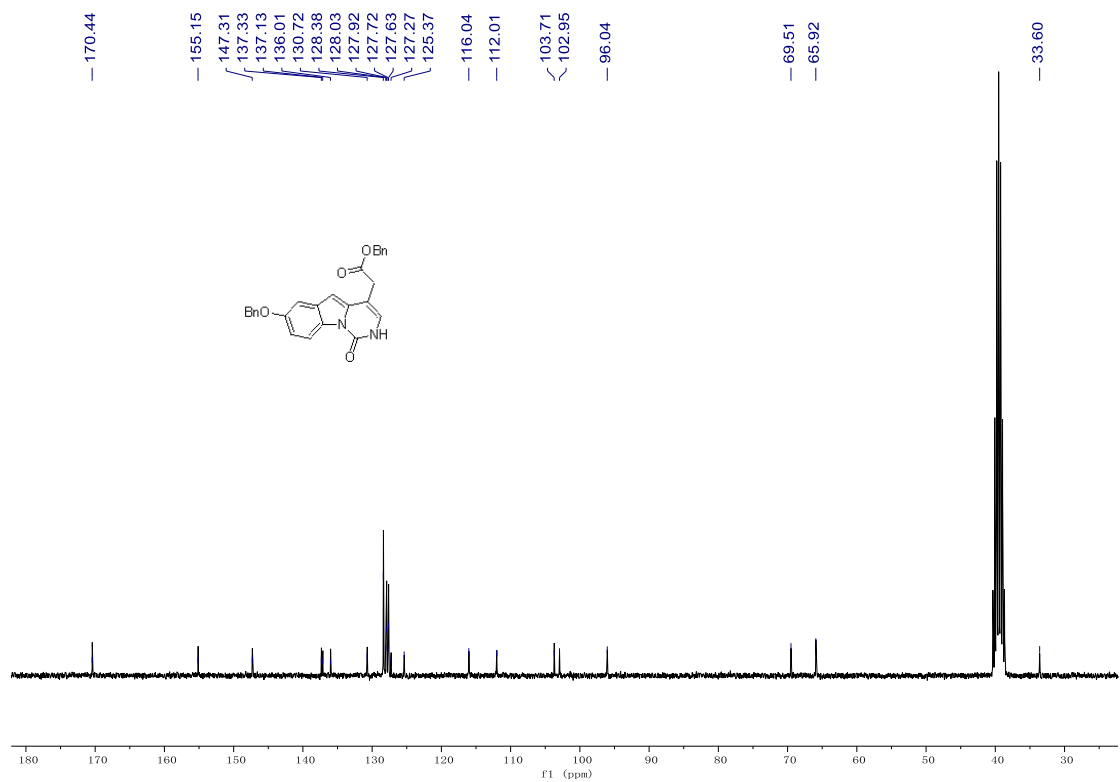

# <sup>1</sup>H NMR (300 MHz, DMSO-d<sub>6</sub>) Spectra of compound 5ea

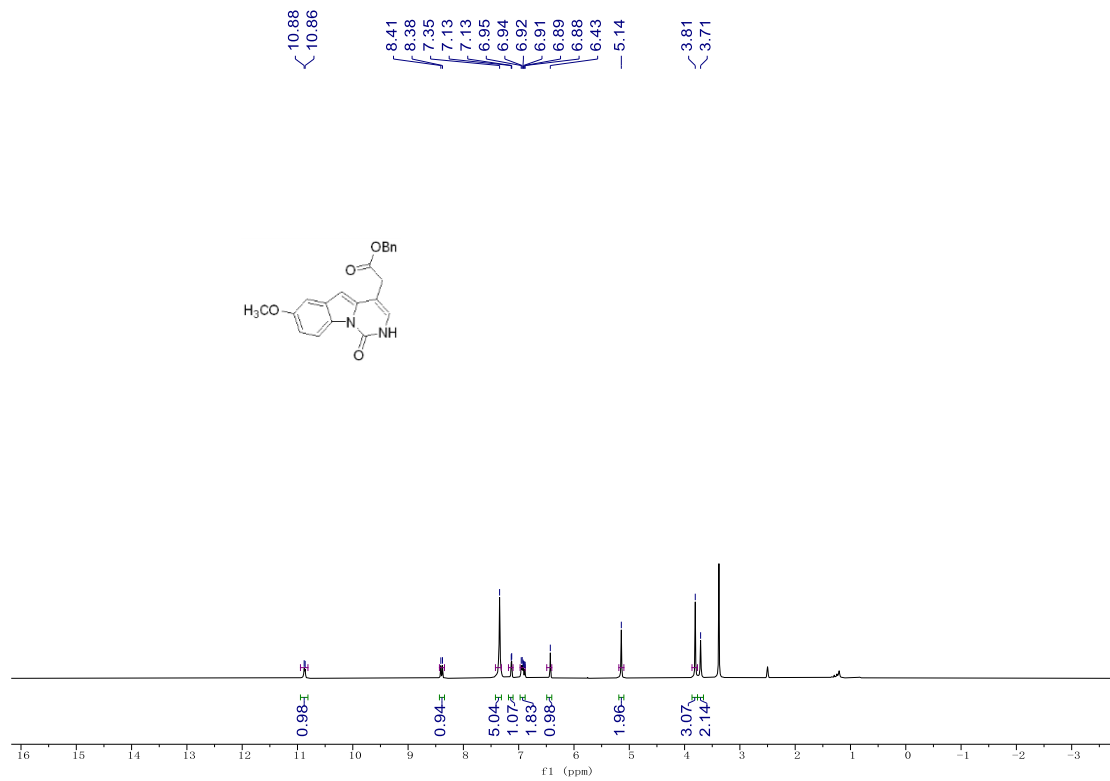

# <sup>13</sup>C NMR (300 MHz, DMSO-d<sub>6</sub>) Spectra of compound 5ea

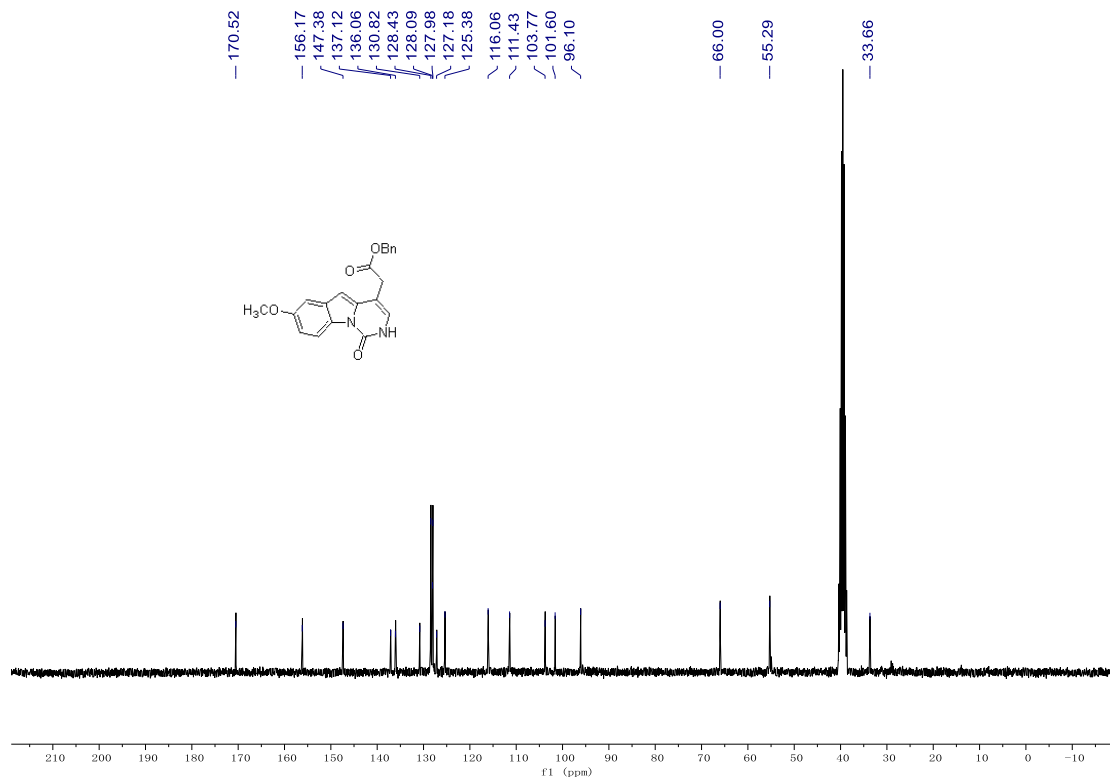

### <sup>1</sup>H NMR (400 MHz, DMSO-*d*<sub>6</sub>) Spectra of compound 5fa

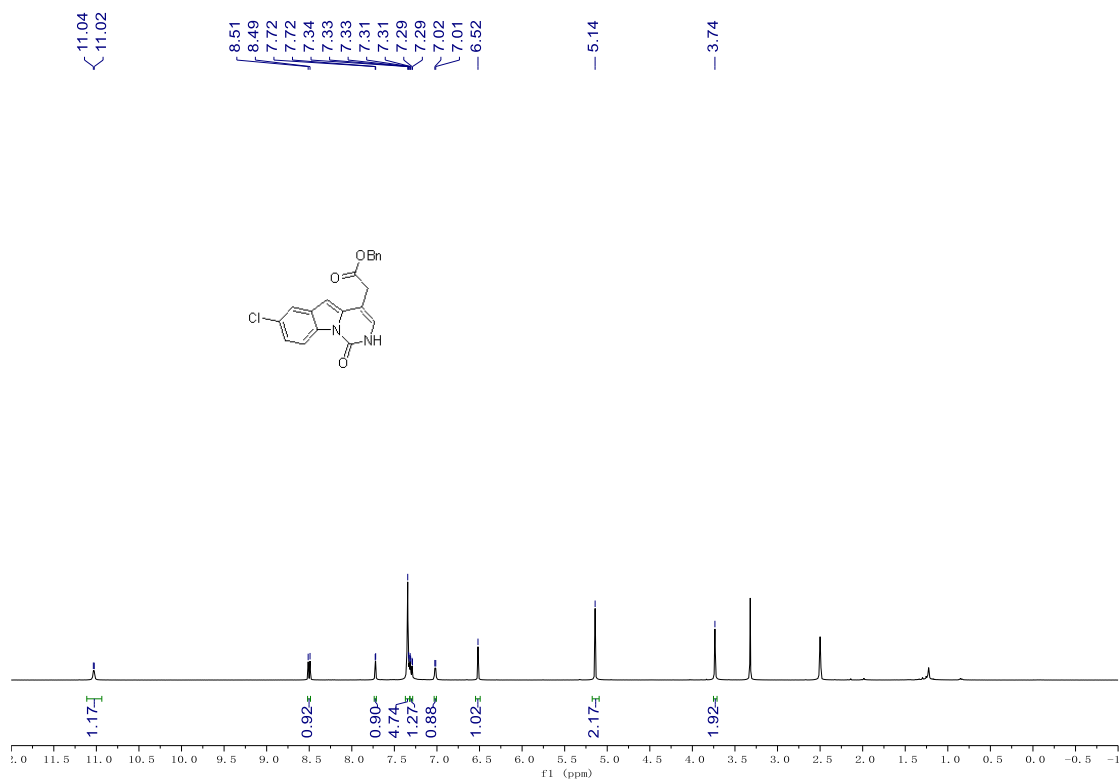

### <sup>13</sup>C NMR (75 MHz, DMSO-*d*<sub>6</sub>) Spectra of compound 5fa

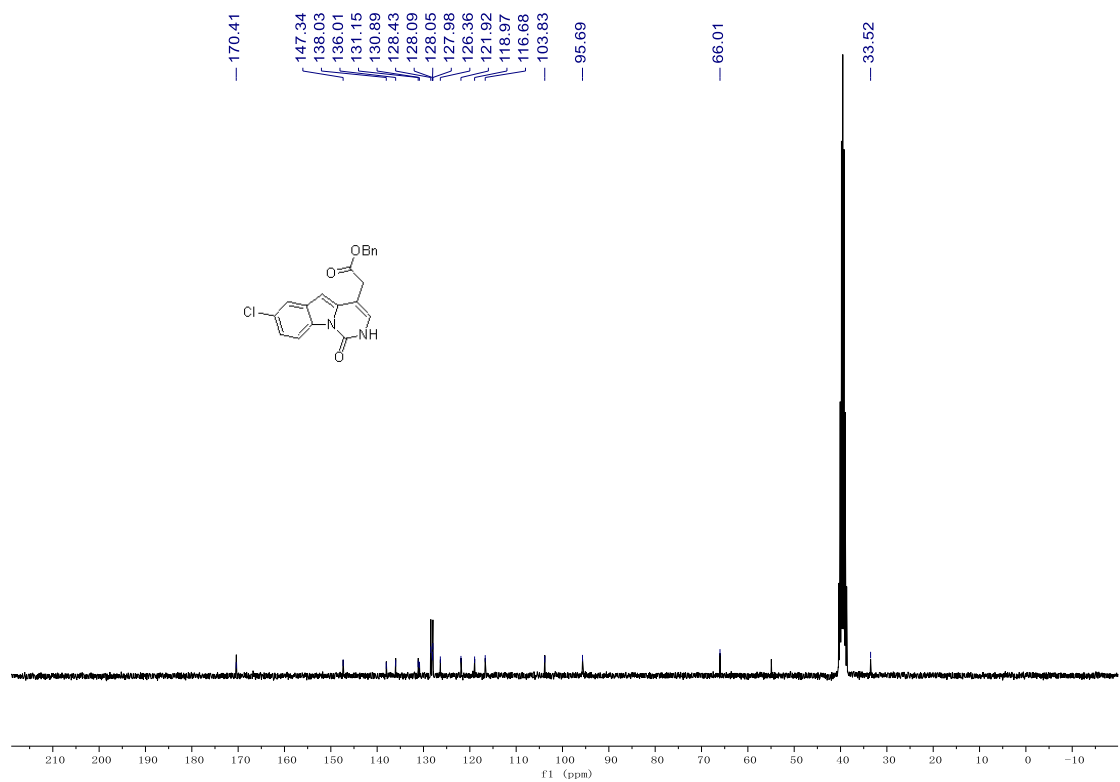

### <sup>1</sup>H NMR (300 MHz, DMSO-*d*<sub>6</sub>) Spectra of compound 5ga

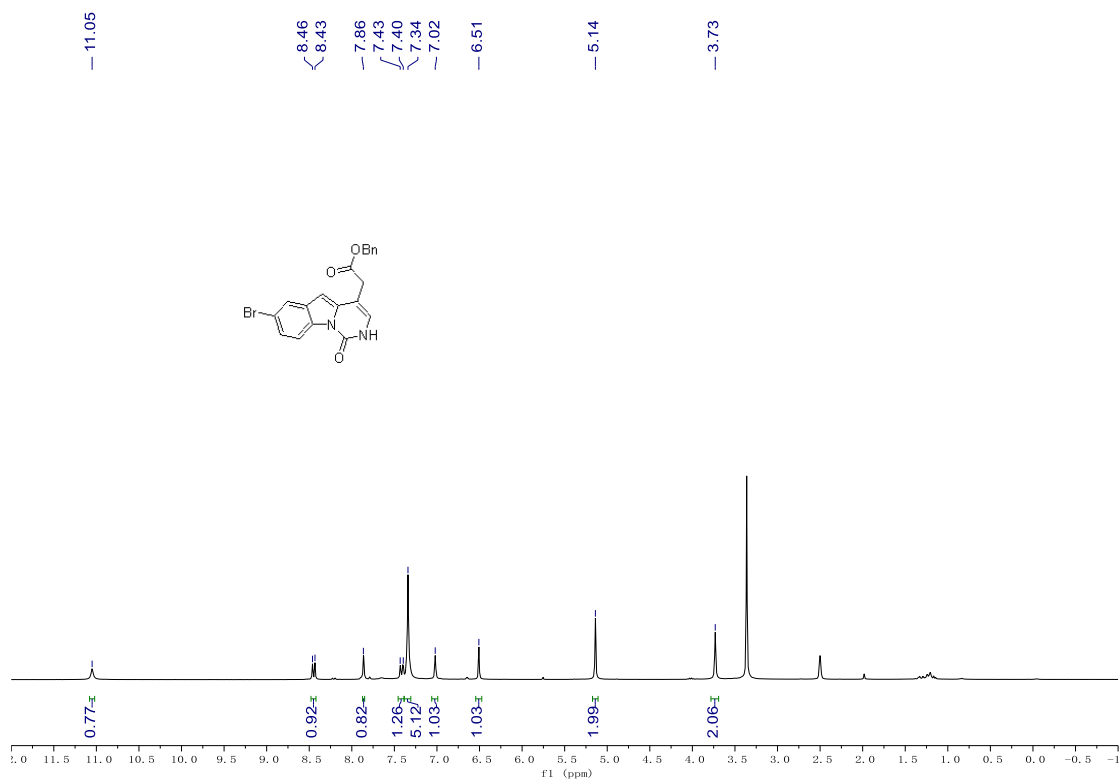

### <sup>13</sup>C NMR (75 MHz, DMSO-*d*<sub>6</sub>) Spectra of compound 5ga

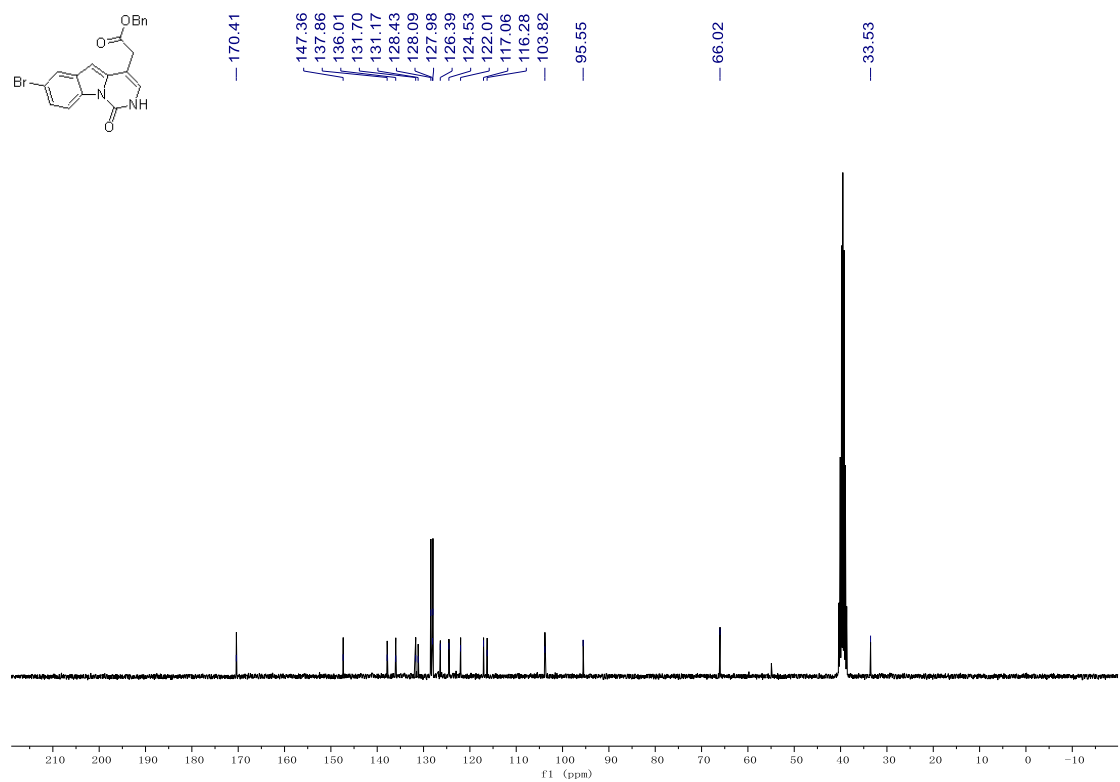

### <sup>1</sup>H NMR (300 MHz, DMSO-*d*<sub>6</sub>) Spectra of compound 5ha

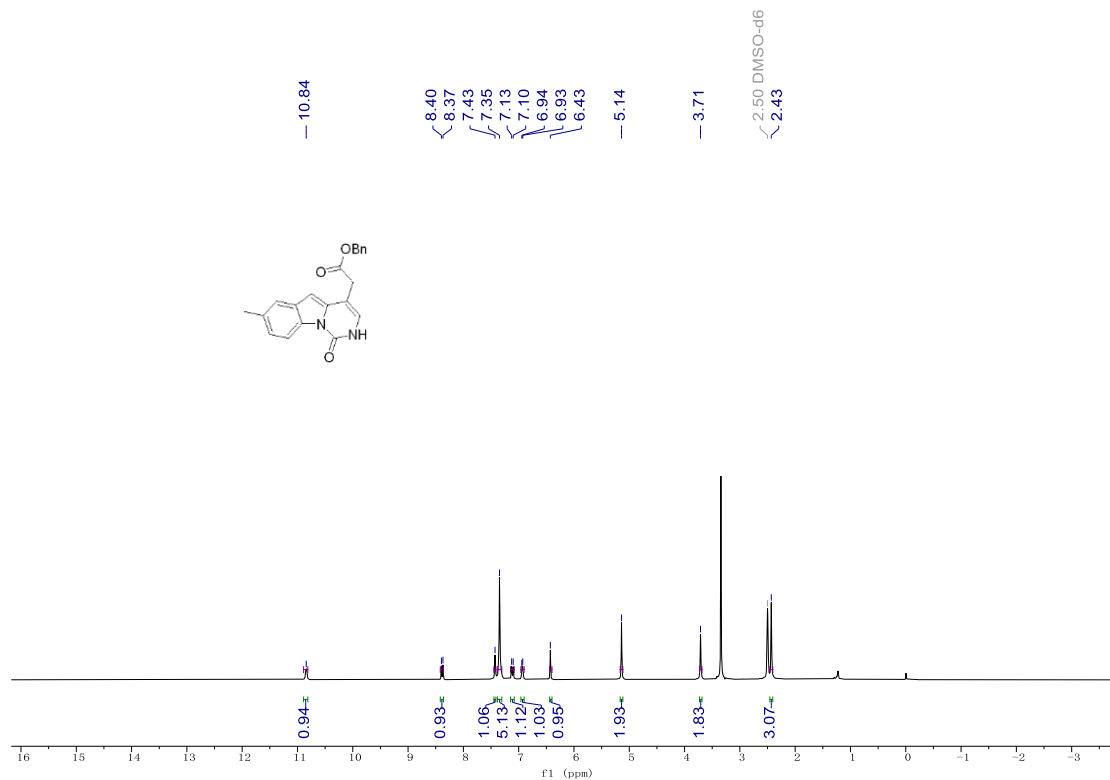

### <sup>13</sup>C NMR (75 MHz, DMSO-*d*<sub>6</sub>) Spectra of compound 5ha

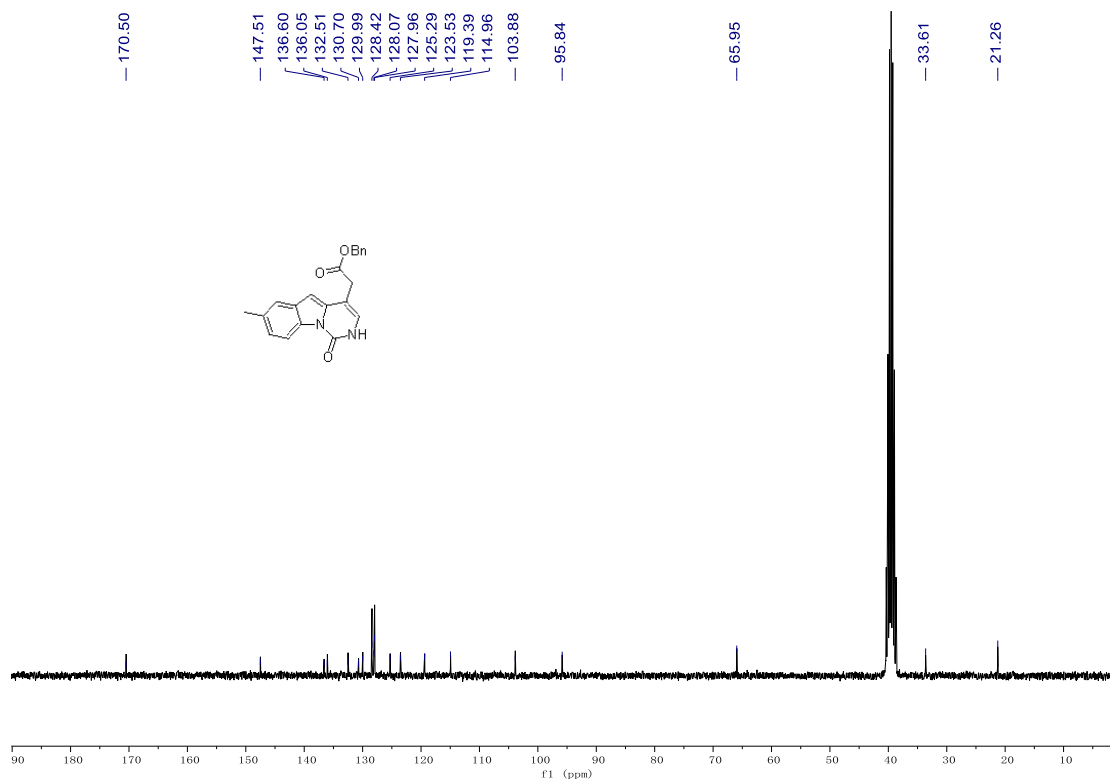

### <sup>1</sup>H NMR (400 MHz, DMSO-*d*<sub>6</sub>) Spectra of compound 5ia

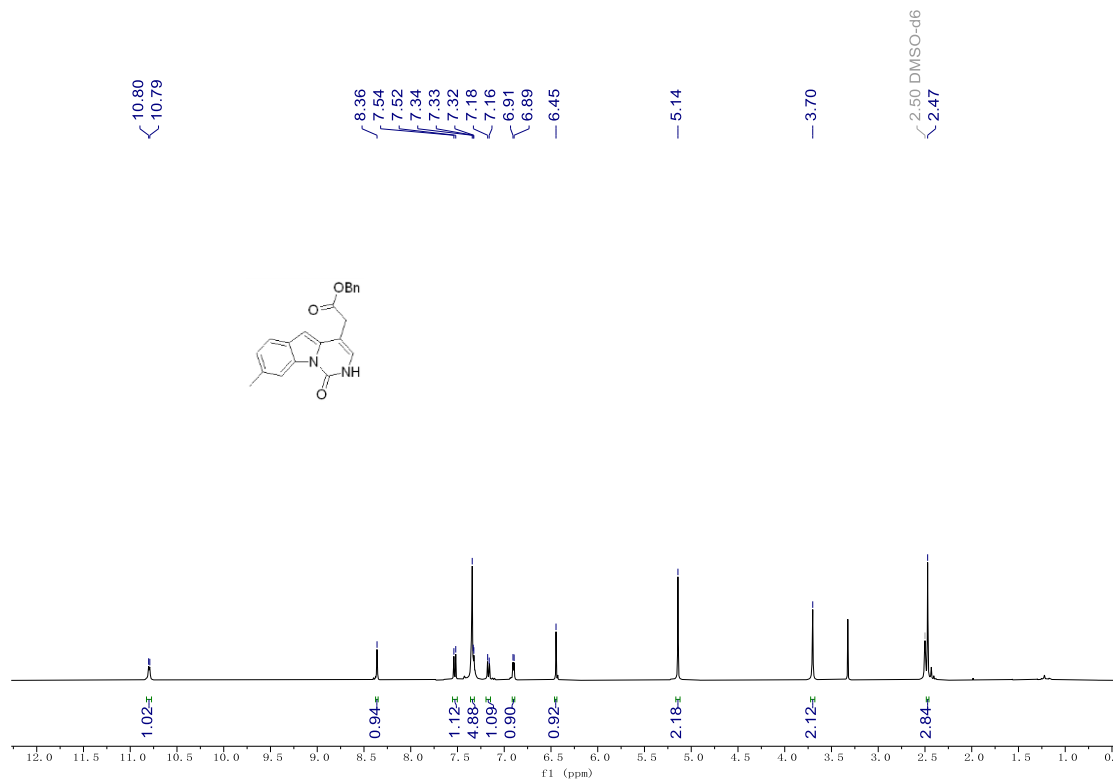

### <sup>13</sup>C NMR (75 MHz, DMSO-*d*<sub>6</sub>) Spectra of compound 5ia

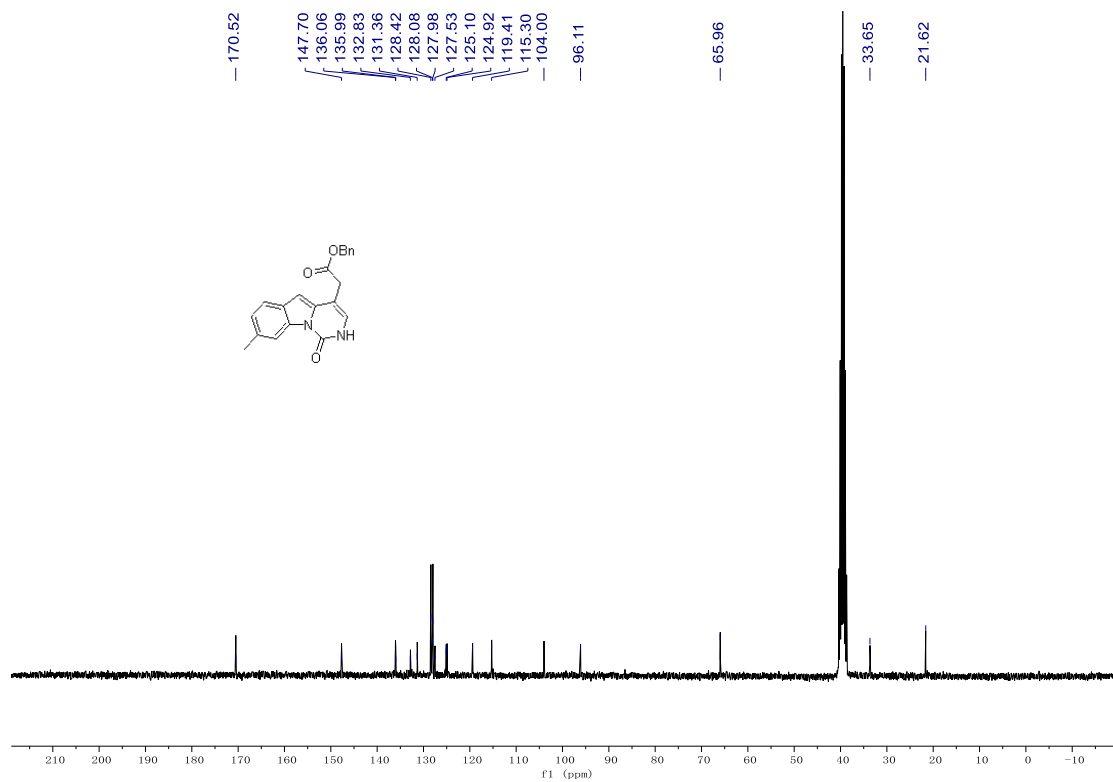



# <sup>1</sup>H NMR (400 MHz, DMSO-*d*<sub>6</sub>) Spectra of compound 5ja

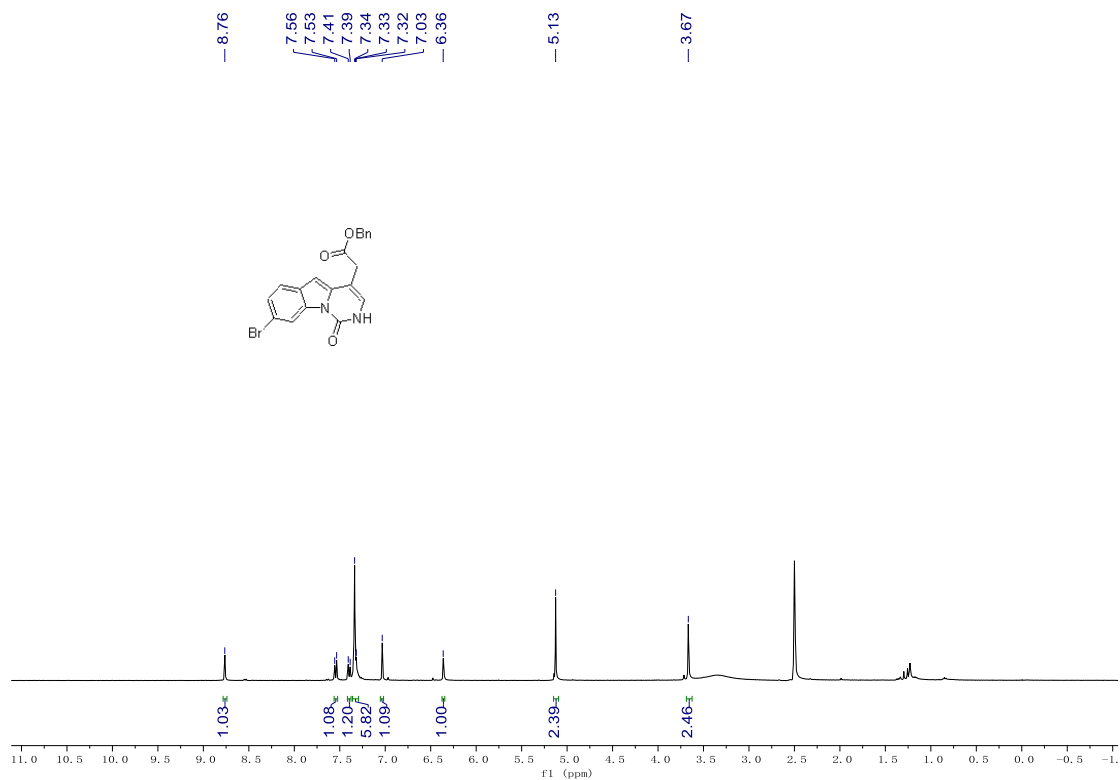

# <sup>13</sup>C NMR (75 MHz, DMSO-*d*<sub>6</sub>) Spectra of compound 5ja

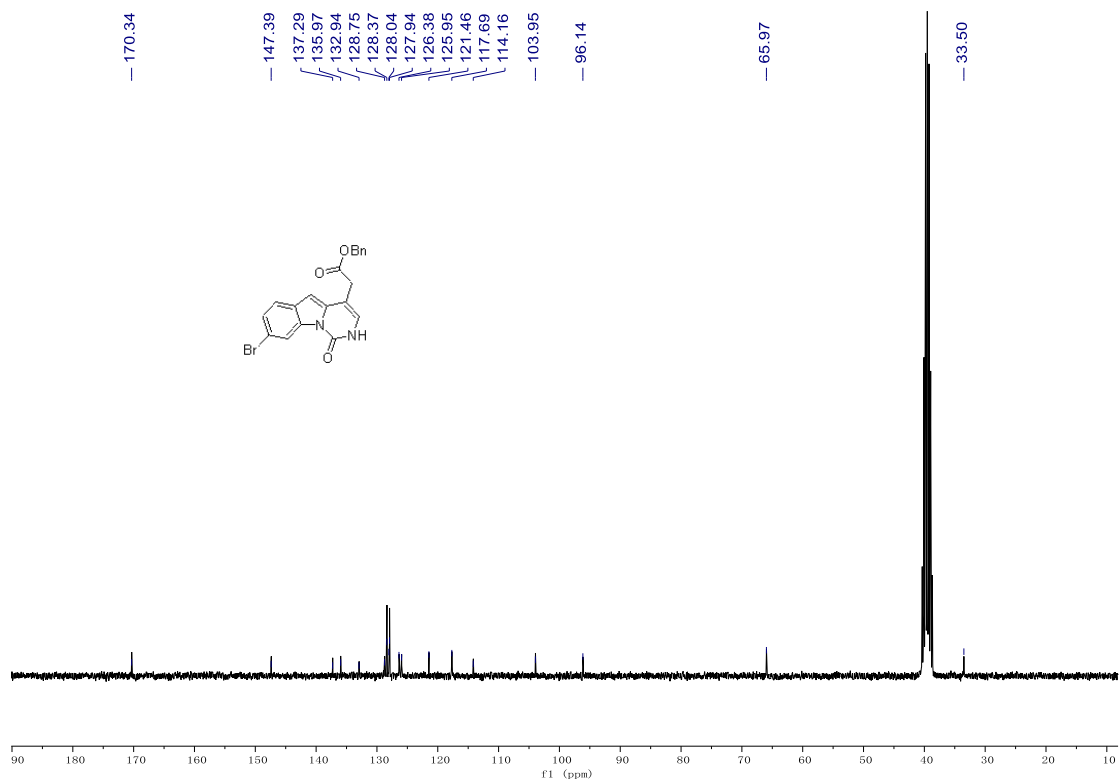

### <sup>1</sup>H NMR (400 MHz, DMSO-*d*<sub>6</sub>) Spectra of compound 5ka

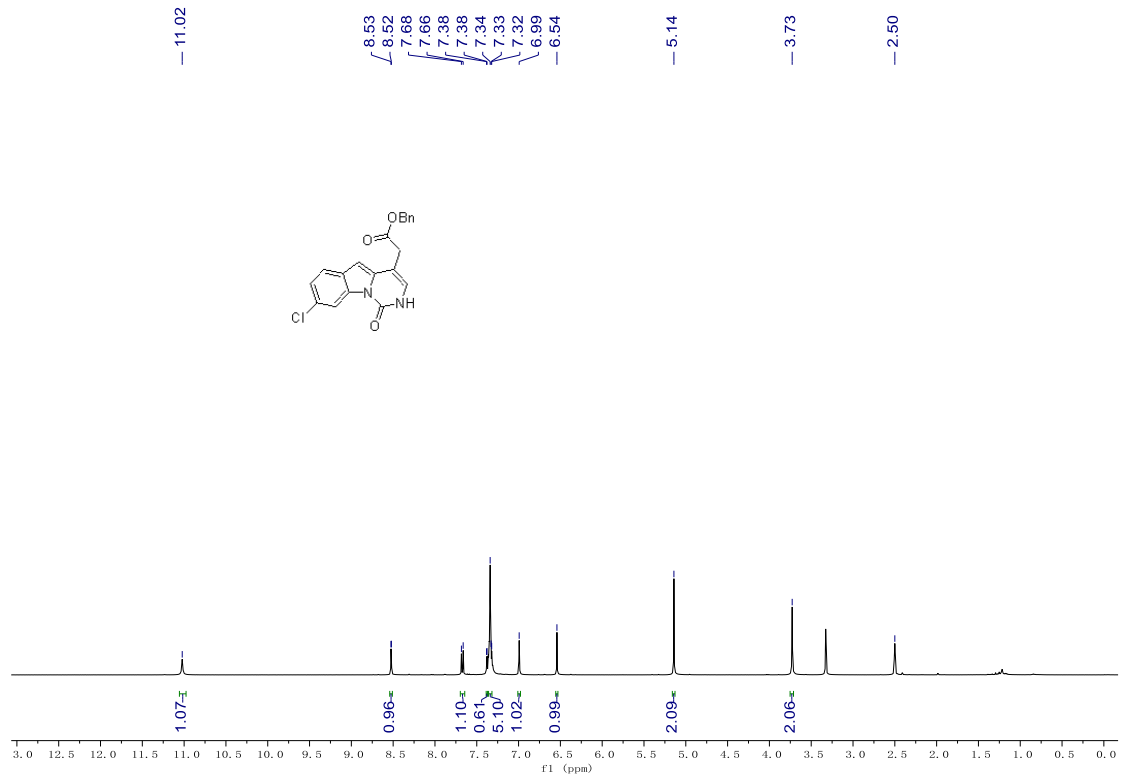

### <sup>13</sup>C NMR (75 MHz, DMSO-*d*<sub>6</sub>) Spectra of compound 5ka

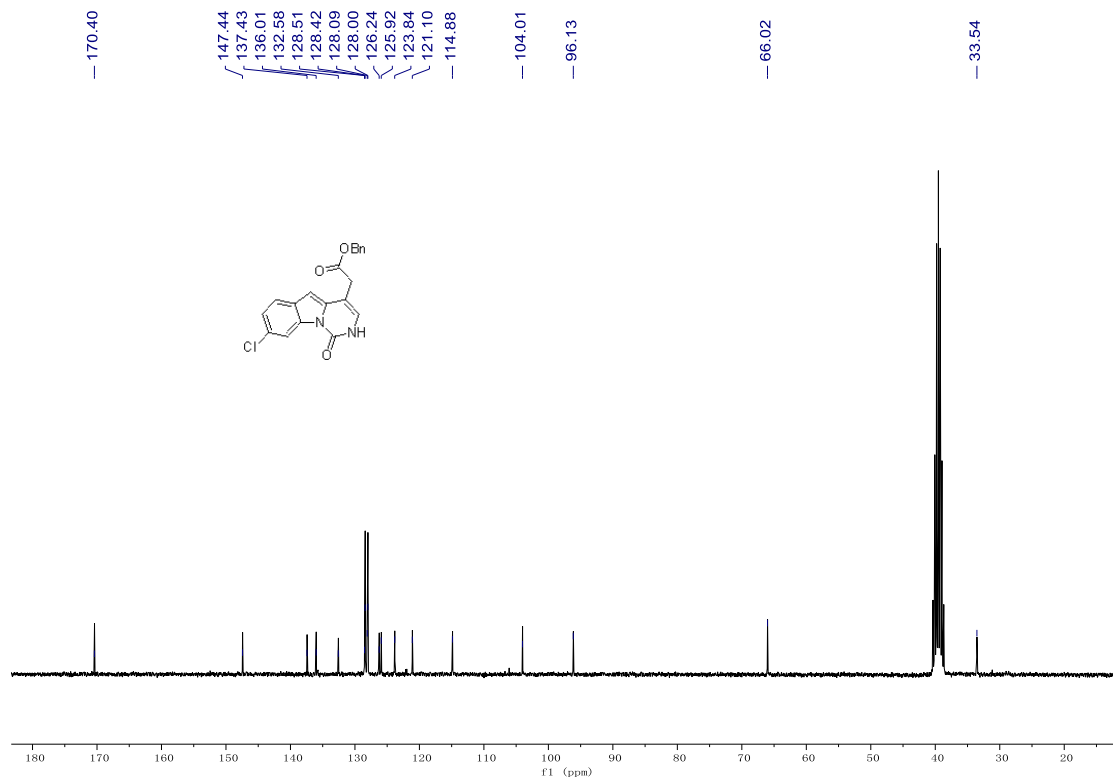

### <sup>1</sup>H NMR (400 MHz, DMSO-*d*<sub>6</sub>) Spectra of compound 5la

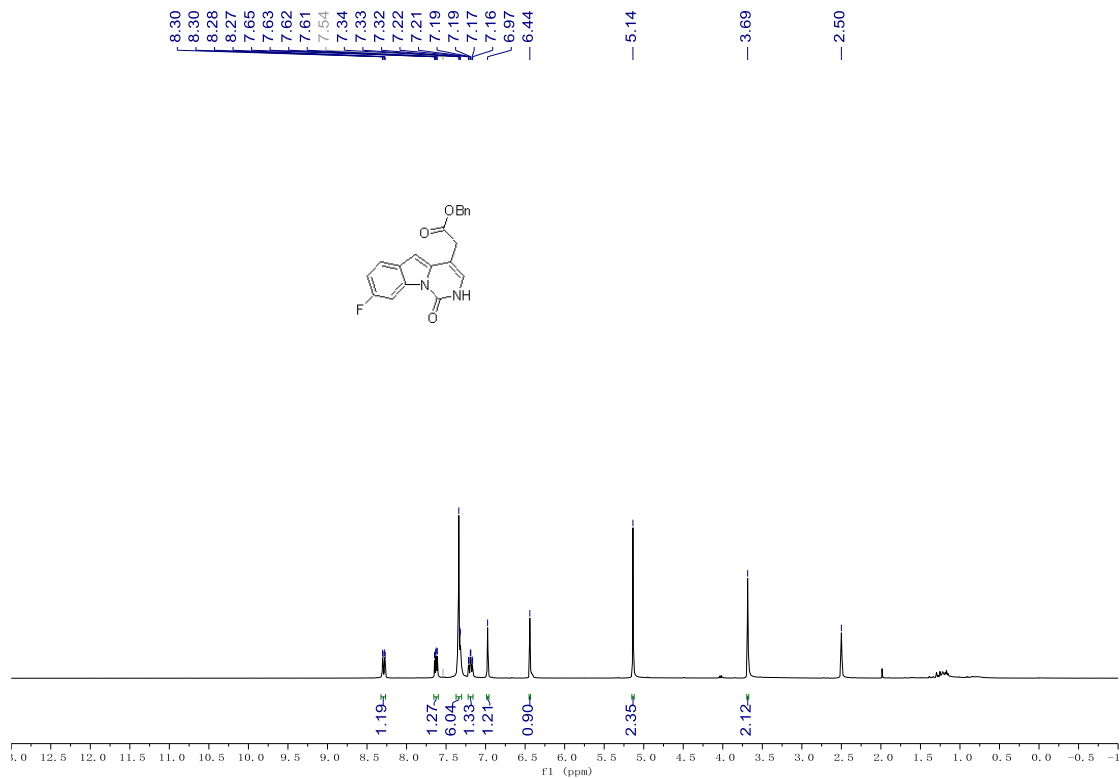

### <sup>13</sup>C NMR (101 MHz, DMSO-*d*<sub>6</sub>) Spectra of compound 5la

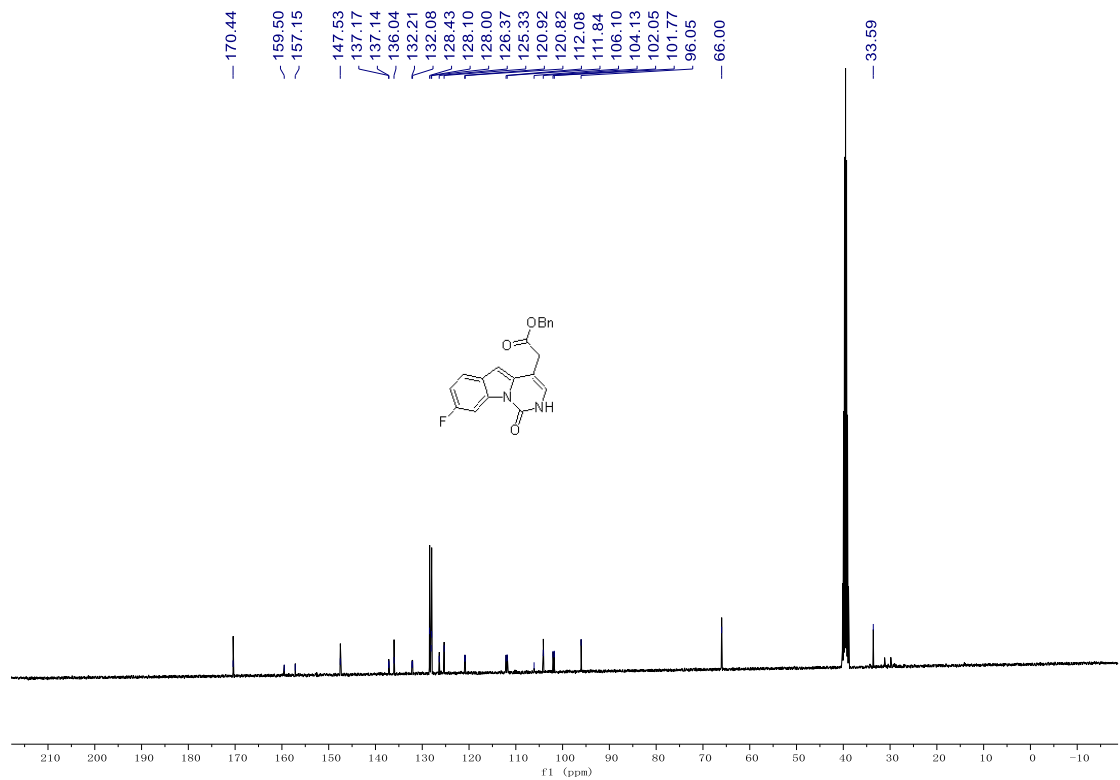

### <sup>1</sup>H NMR (400 MHz, DMSO-d<sub>6</sub>) Spectra of compound 5ma

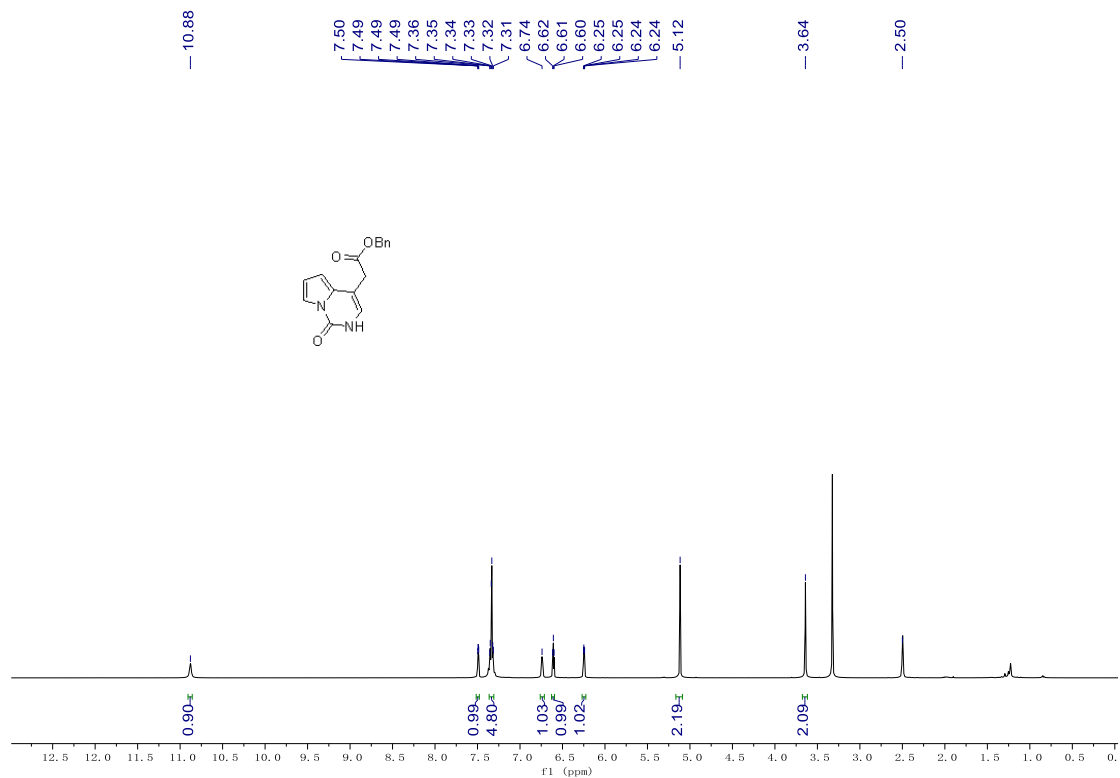

### <sup>13</sup>C NMR (126 MHz, DMSO-d<sub>6</sub>) Spectra of compound 5ma

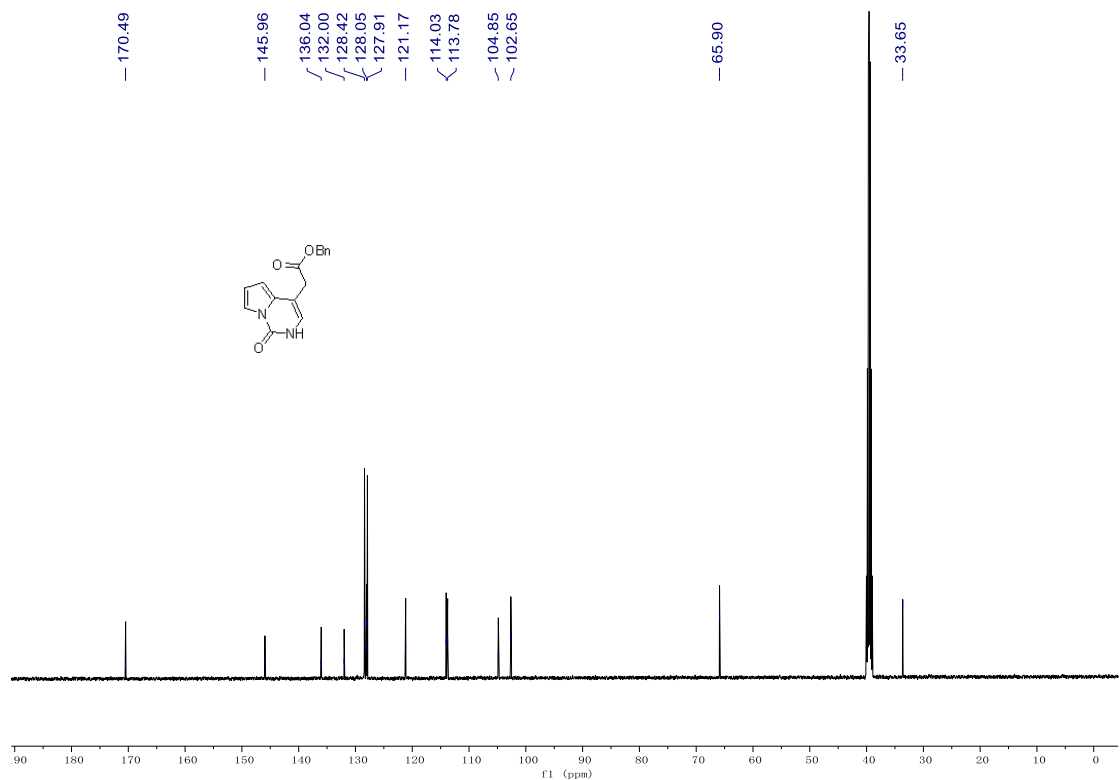

# <sup>1</sup>H NMR (500 MHz, CDCl<sub>3</sub>) Spectra of compound 5ab

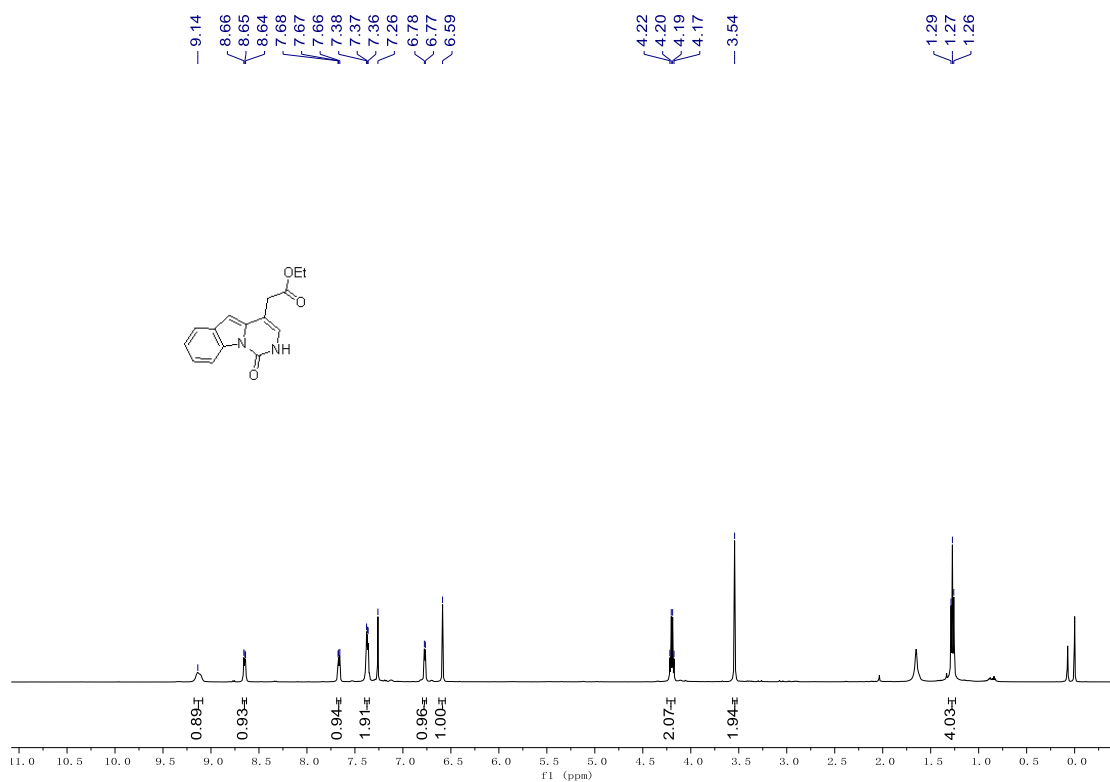

# <sup>13</sup>C NMR (126 MHz, CDCl<sub>3</sub>) Spectra of compound 5ab

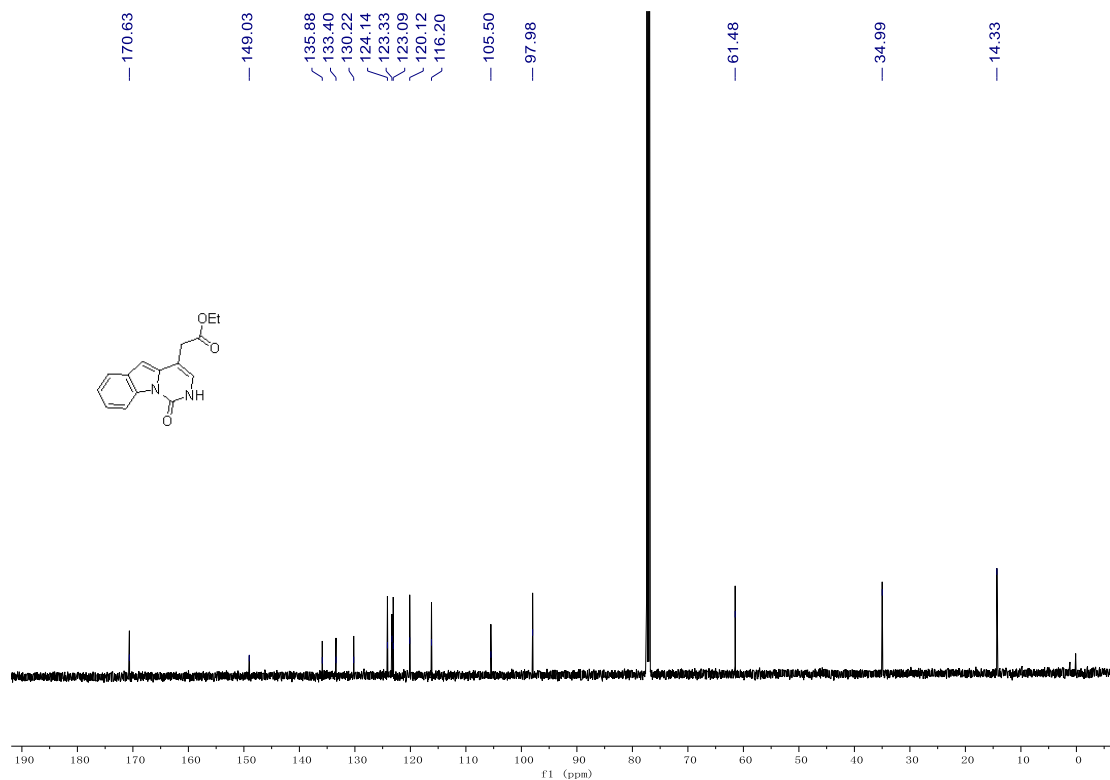

### $^1\text{H}$ NMR (300 MHz, $\text{DMSO-}d_6$ ) Spectra of compound **5ac**

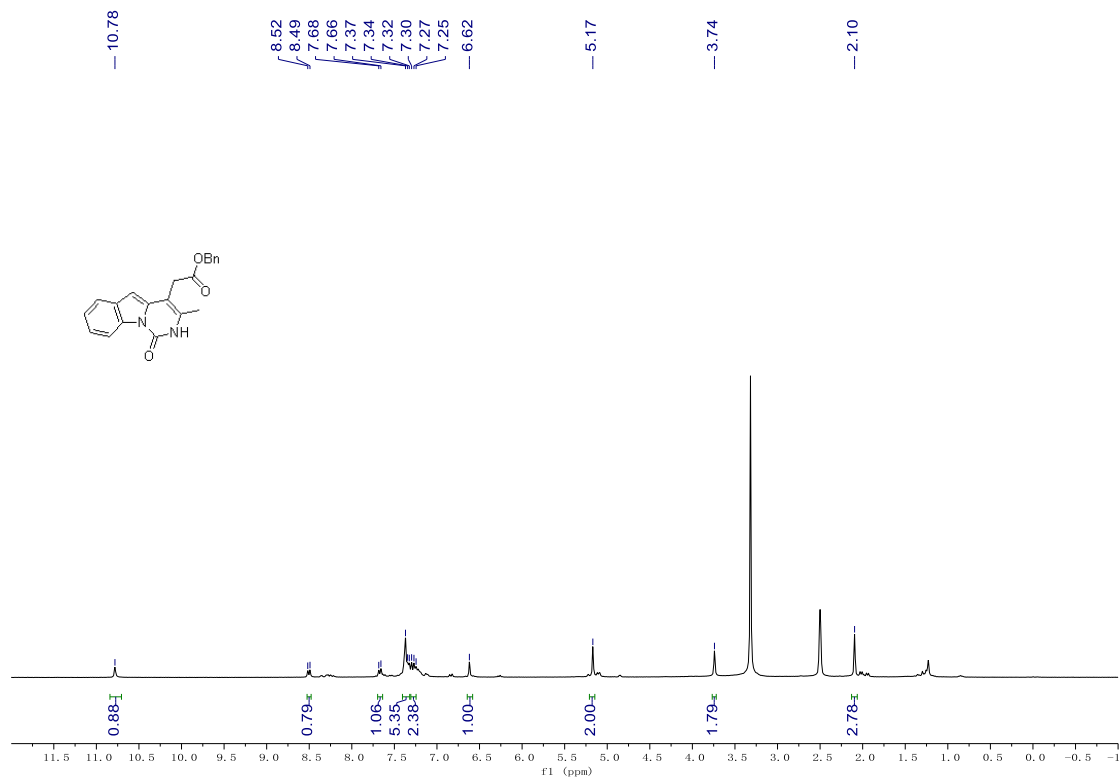

### $^{13}\text{C}$ NMR (75 MHz, $\text{DMSO-}d_6$ ) Spectra of compound **5ac**

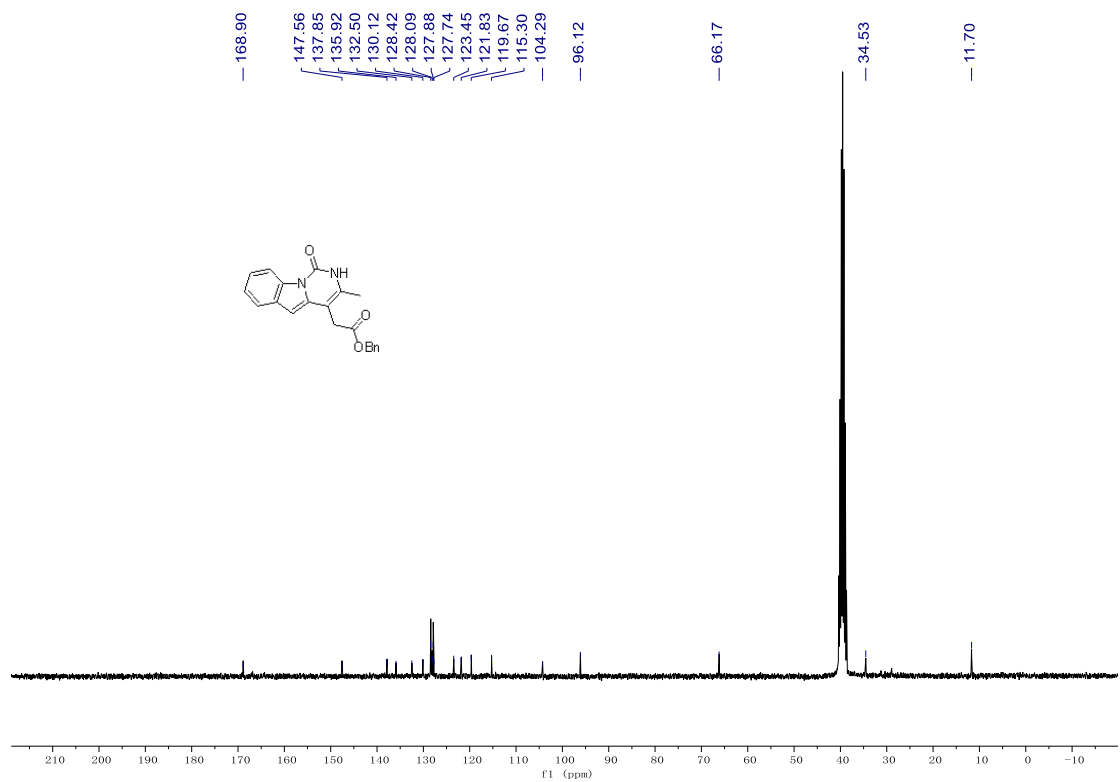

# <sup>1</sup>H NMR (500 MHz, DMSO-*d*<sub>6</sub>) Spectra of compound 5ad

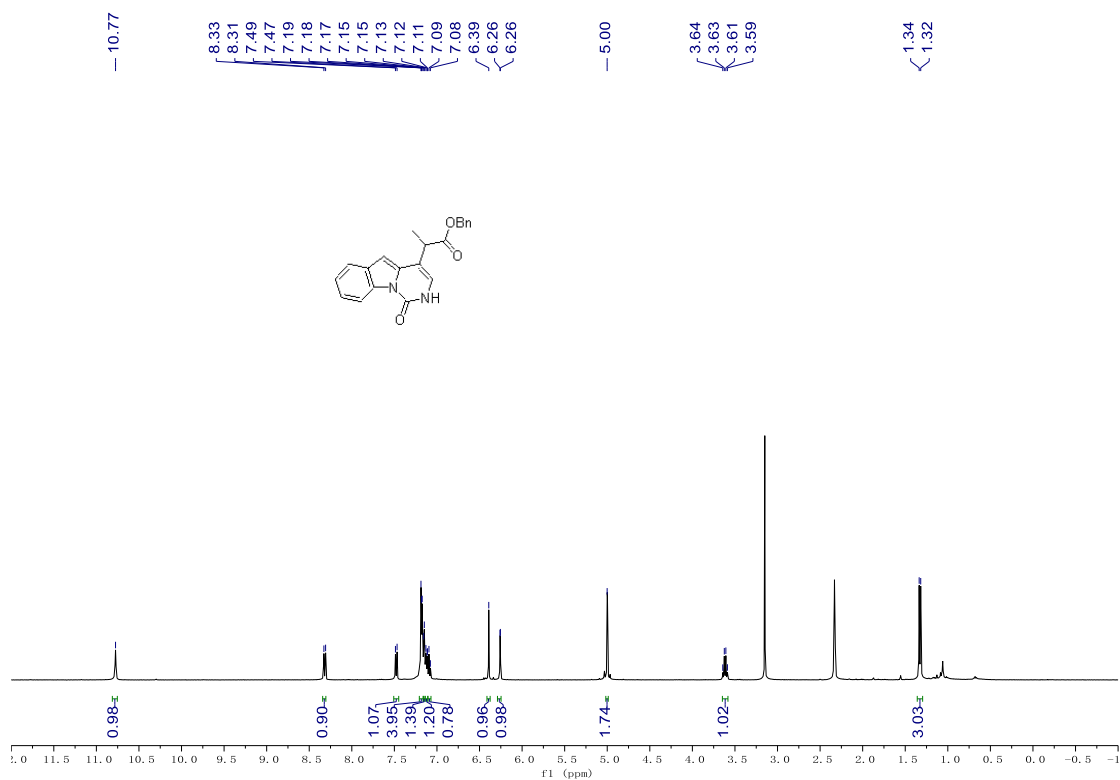

# <sup>13</sup>C NMR (126 MHz, DMSO-*d*<sub>6</sub>) Spectra of compound 5ad

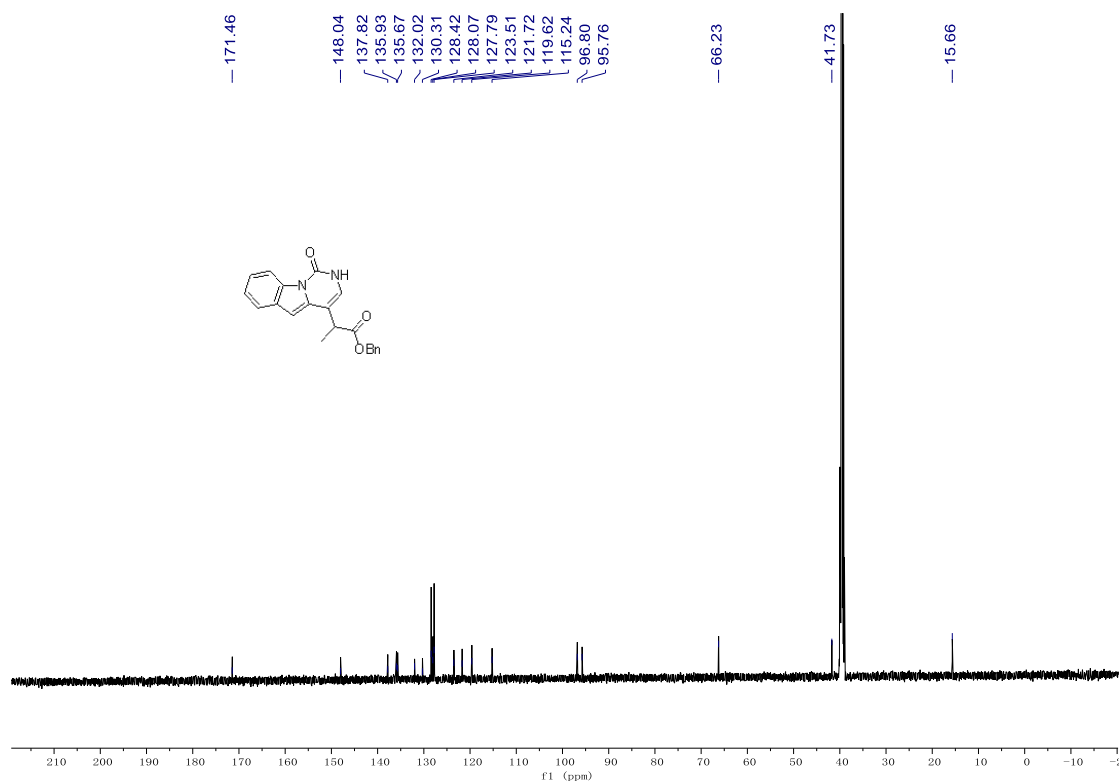

<sup>1</sup>H NMR (500 MHz, CDCl<sub>3</sub>) Spectra of compound 5ae

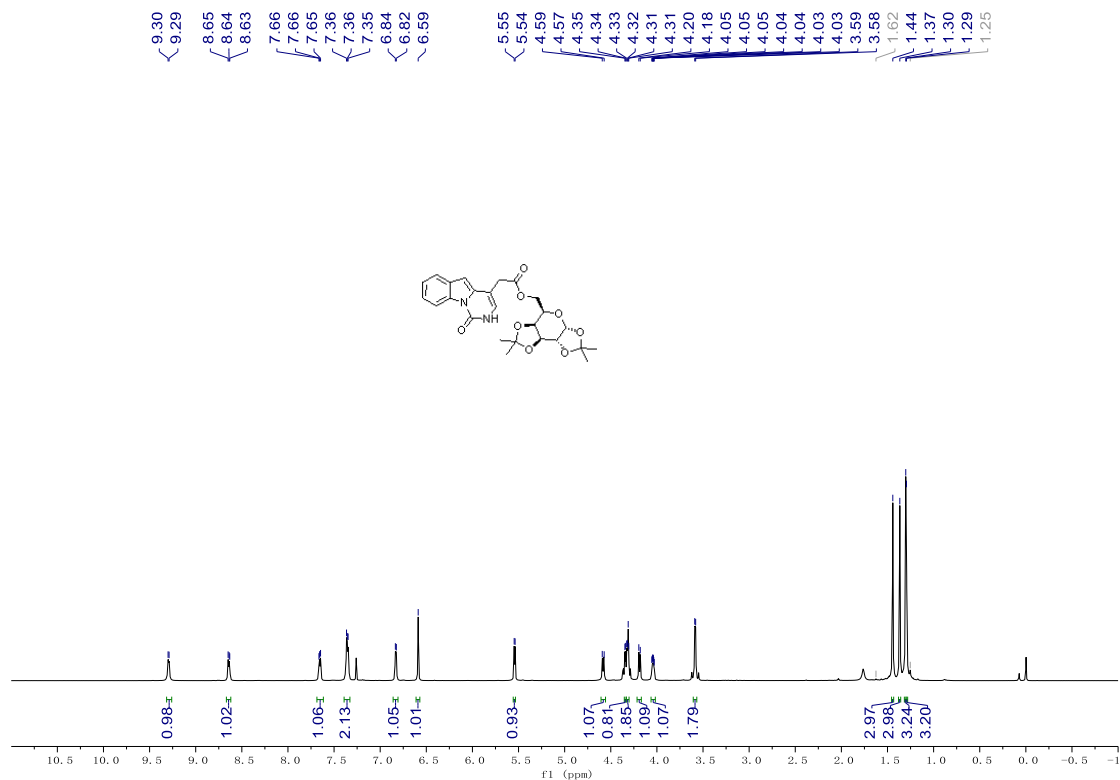

<sup>13</sup>C NMR (126 MHz, CDCl<sub>3</sub>) Spectra of compound 5ae

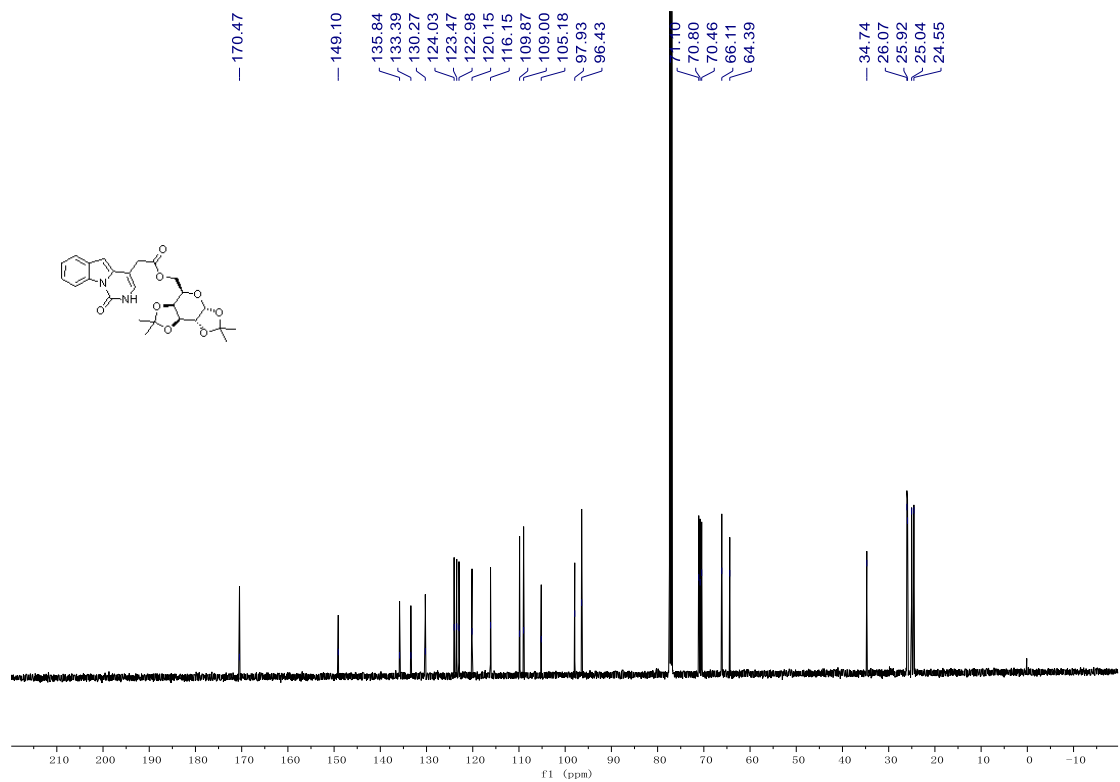



# <sup>1</sup>H NMR (300 MHz, CDCl<sub>3</sub>) Spectra of compound 5ag

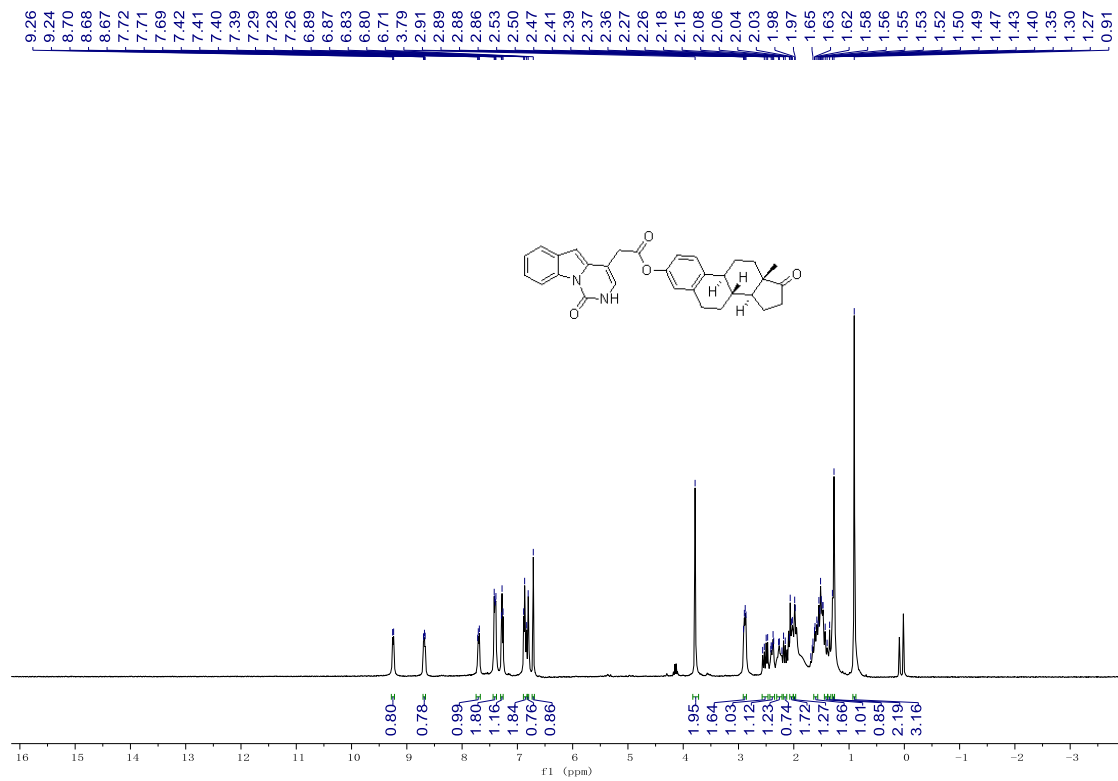

# <sup>13</sup>C NMR (126 MHz, CDCl<sub>3</sub>) Spectra of compound 5ag

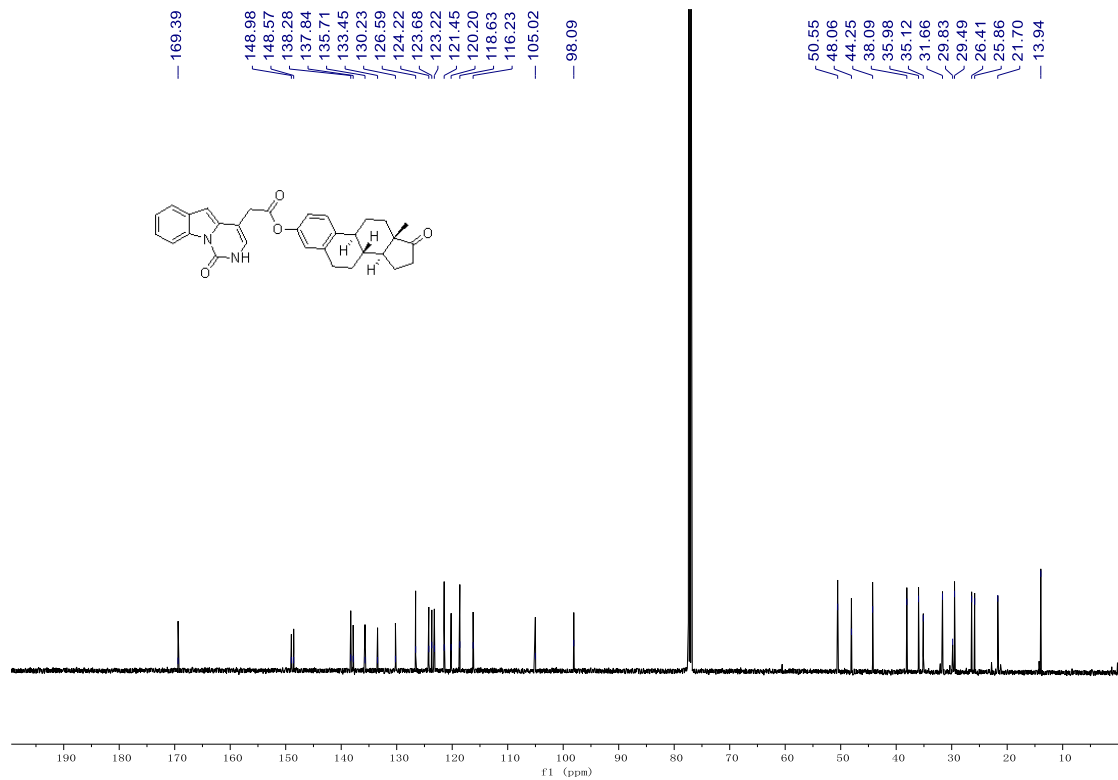



# <sup>1</sup>H NMR (300 MHz, CDCl<sub>3</sub>) Spectra of compound 5ai

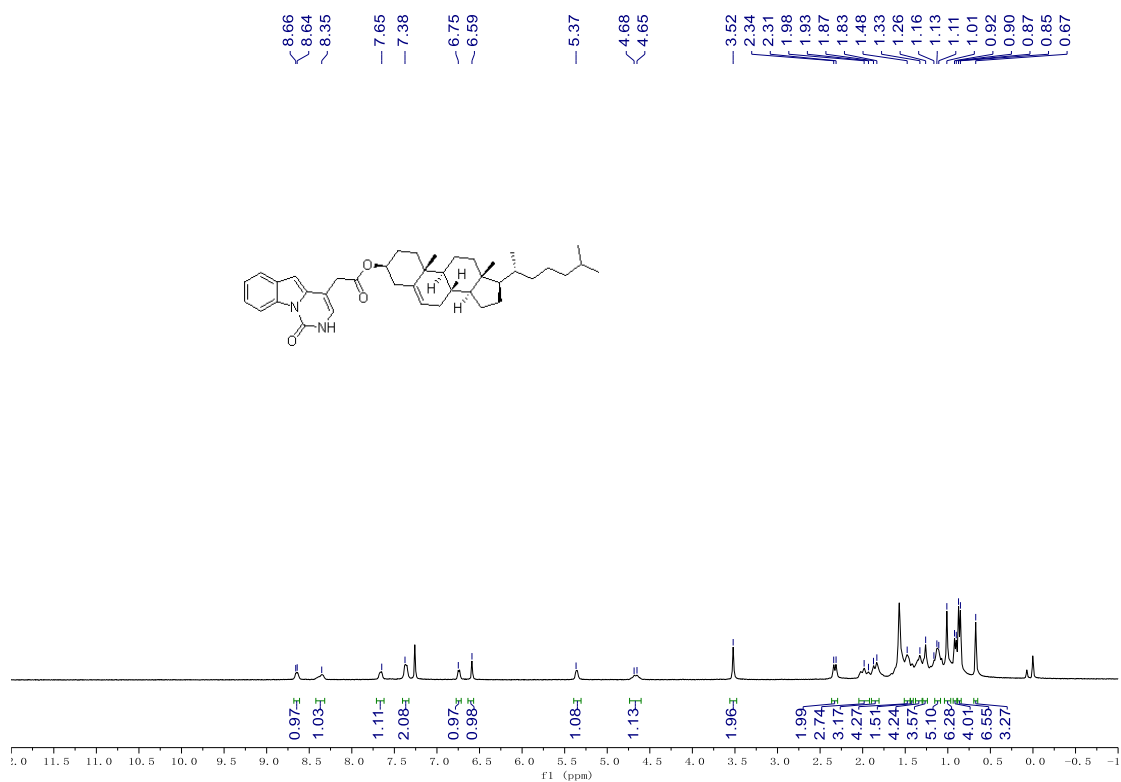

# <sup>13</sup>C NMR (75 MHz, CDCl<sub>3</sub>) Spectra of compound 5ai

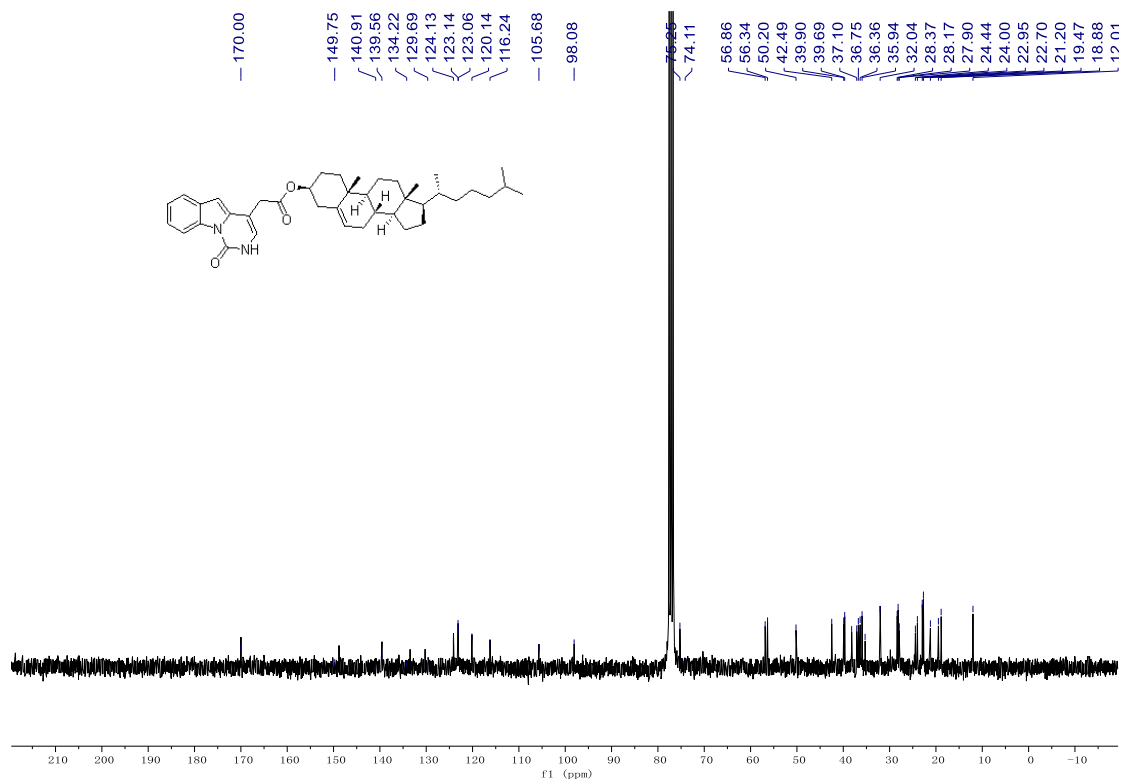

Supplement: d3cc05342c1.pdf [file d3cc05342c1.pdf]
